# Supplementary material for: A DFT study of NHC-catalyzed reactions of [3+3] annulations of 2-bromoenals and thioamides: mechanisms and regio- and stereoselectivities
Source: Royal Society of Chemistry journal article supplement (doi:10.1039/d3nj04532c), 2023-01-01
Supplement: d3nj04532c1.pdf [file d3nj04532c1.pdf]

*Supporting Information*

**A DFT Study of NHC-Catalyzed Reaction of [3 + 3] Annulation of 2-Bromo-enals  
and Thioamides: Mechanism, Regio- and Stereoselectivities**

**Yan Li\*, Lina Geng, Zhiyi Song, Zhiqiang Zhang\***

*School of Chemical Engineering, University of Science and Technology Liaoning,*

*Qianshan Road 185, Anshan 114051, China*

***Corresponding person: Yan Li***

***E-mail: [yanli@ustl.edu.cn](mailto:yanli@ustl.edu.cn)***

***[zzq@ustl.edu.com](mailto:zzq@ustl.edu.com)***

***Telephone: +86-412-5929627***

***Fax: +86-412-5929627***

## List of Contents

|                                                            |     |
|------------------------------------------------------------|-----|
| 1. Computational Details.....                              | S1  |
| 2. Test results at different levels.....                   | S3  |
| 3. Generation of NHC.....                                  | S4  |
| 4. Generation of R2.....                                   | S6  |
| 5. Unfavorable pathways for steps1-2.....                  | S8  |
| 6. Unfavorable pathways for 2-4.....                       | S9  |
| 7. Conformation search of TS5.....                         | S10 |
| 8. Possible pathways for 1,5-proton transfer.....          | S11 |
| 9. Cartesian coordinates of all the stationary points..... | S12 |

## 1. Computational Details

### (1) Calculation of enantiomeric excess (ee)

The extent of enantioselectivity, in terms of enantiomeric excess (ee %), was calculated by using the Boltzmann distribution of diastereomeric transition states with the following equations:

$$\frac{[R]}{[S]} = \frac{\exp(-G_{[R]}^\ddagger)}{\exp(-G_{[S]}^\ddagger)} = \exp(\Delta G^\ddagger / RT) \quad (1)$$

$$ee = \frac{[R] - [S]}{[R] + [S]} \times 100\% = \frac{\frac{[R]}{[S]} - 1}{\frac{[R]}{[S]} + 1} \times 100\% \quad (2)$$

Where  $G^\ddagger$  is the Gibbs free energy barrier of the competing diastereomeric transition state and  $\Delta G^\ddagger$  is the Gibbs free energy difference between the two diastereomeric transition states.

### (2) Distortion-interaction model

In distortion-interaction analysis, the transition state was divided into two fragments, followed by single point energy calculations on each fragment. The activation energy  $\Delta E^\ddagger$  was divided into  $\Delta E_{\text{dist}}^\ddagger$  and  $\Delta E_{\text{int}}^\ddagger$ , where  $\Delta E_{\text{dist}}^\ddagger$  and  $\Delta E_{\text{int}}^\ddagger$  are distortion energy and interaction energy, respectively. The distortion energy  $\Delta E_{\text{dist}}^\ddagger$  of each fragment is the energy difference between the distorted fragment and the corresponding optimized structure without the other fragment. The interaction energy  $\Delta E_{\text{int}}^\ddagger$  can be calculated using  $\Delta E_{\text{int}}^\ddagger = \Delta E^\ddagger - \Delta E_{\text{dist}}^\ddagger$ .

### (3) Global reactivity indexes (GRI) analysis

In global reactivity index (GRI) analysis, the electrophilicity index  $\omega$  which reflects the molecular global electrophilicity character can be measured with the expression  $\omega = (\mu^2/2\eta)$  (eV), where  $\mu$  is the electronic chemical potential and  $\eta$  is the chemical hardness. The values of  $\mu$  and  $\eta$  can be determined in terms of the one-electron energy of HOMO and LUMO ( $E_{\text{HOMO}}$  and  $E_{\text{LUMO}}$ ) using  $\mu \approx (E_{\text{HOMO}} - E_{\text{LUMO}})/2$  and  $\eta \approx (E_{\text{LUMO}} - E_{\text{HOMO}})$ . Within the Kohn–Sham scheme, the molecular nucleophilicity

character is reflected by the value of the nucleophilicity index  $N$  as defined in  $N = E_{\text{HOMO}}(\text{Nu}) - E_{\text{LUMO}}(\text{TCE})$ , where  $E_{\text{LUMO}}(\text{TCE})$  is the LUMO energy of tetracyanoethylene (TCE).

## 2. Test results at different levels

**Table S1** Comparisons of relative energies for stereoselective transition states. Energies (in kcal/mol) are based on SMD(mesitylene)M06-2X/6-31G(d,p)-optimized geometries.

|             | M06-2X-D3 |        | B3LYP-D3 |        | $\omega$ B97X-D |        |
|-------------|-----------|--------|----------|--------|-----------------|--------|
|             | SMD       | IEFPCM | SMD      | IEFPCM | SMD             | IEFPCM |
| <b>TS5R</b> | 4.1       | 2.8    | 3.1      | 1.8    | 3.3             | 2.0    |
| <b>TS5S</b> | 0.0       | 0.0    | 0.0      | 0.0    | 0.0             | 0.0    |

**Table S2** Different computational levels.

| Different levels | Optimization    |            | Single Point Energy |                   | Solvation model |
|------------------|-----------------|------------|---------------------|-------------------|-----------------|
|                  | Method          | Basis set  | Method              | Basis set         |                 |
| <b>L1</b>        | M06-2X          | 6-31G(d,p) | M06-2X-D3           | 6-311++G(2df,2pd) | IEFPCM          |
| <b>L2</b>        | M06-2X          | 6-31G(d,p) | M06-2X-D3           | 6-311++G(2df,2pd) | SMD             |
| <b>L3</b>        | $\omega$ B97X-D | 6-31G(d,p) | $\omega$ B97X-D     | 6-311++G(2df,2pd) | IEFPCM          |
| <b>L4</b>        | $\omega$ B97X-D | 6-31G(d,p) | $\omega$ B97X-D     | 6-311++G(2df,2pd) | SMD             |

**Table S3** Comparisons of relative energies for stereoselective transition states with different Levels L1~L4. Energies are given in kcal/mol.

|             | <b>L1</b> | <b>L2</b> | <b>L3</b> | <b>L4</b> |
|-------------|-----------|-----------|-----------|-----------|
| <b>TS5R</b> | 4.1       | 2.5       | 3.2       | 2.0       |
| <b>TS5S</b> | 0.0       | 0.0       | 0.0       | 0.0       |

### 3. Generation of NHC.

**Fig. S1** The deprotonation of Pre-NHC by base ( $K_2CO_3$ ) generating NHC.

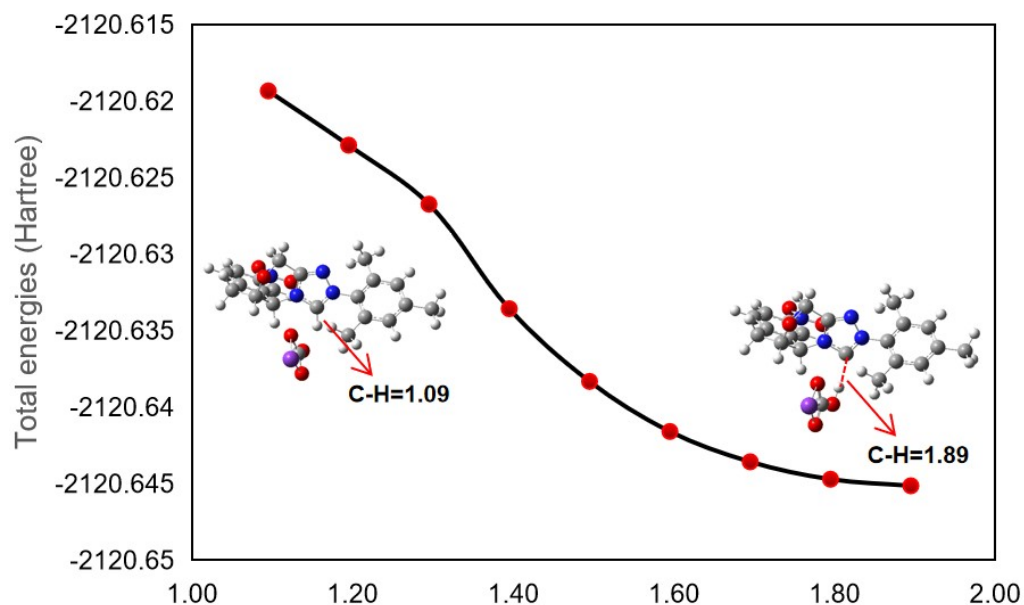

It should be noted that the **Pre-NHC** was firstly deprotonated by base ( $K_2CO_3$ ) or additive ( $LiOAc$ ) to generate the active catalyst **NHC**. However, for the deprotonation by  $KCO_3^-$ , we can not locate the transition state despite of lots of attempts. Then we scanned the changes of C-H bond (Fig. S1). Fig.S1 shows that this process has no energy barrier.

**Fig. S2** The deprotonation of Pre-NHC by additive (LiOAc) generating NHC.

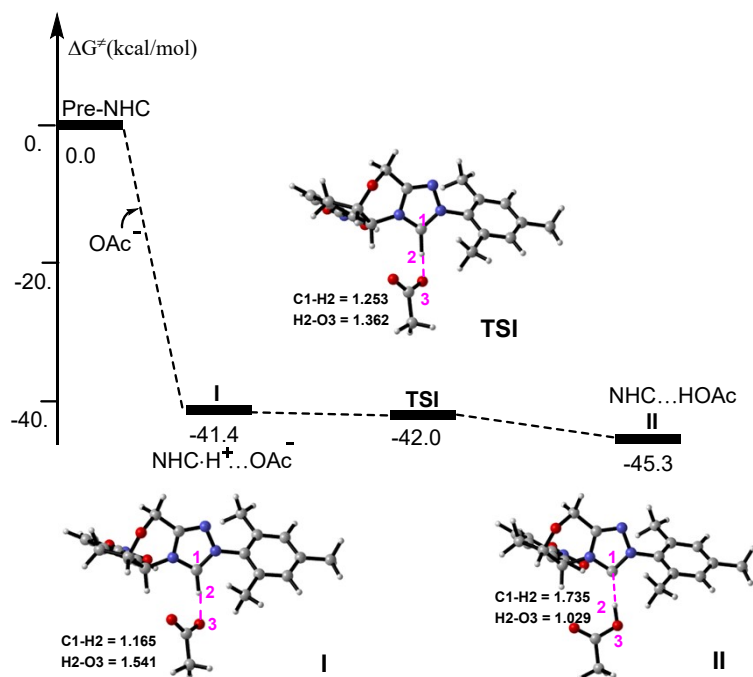

In addition, we examined the deprotonation of **Pre-NHC** by LiOAc. The deprotonation of **Pre-NHC** by base OAc<sup>-</sup> (derived from LiOAc) generates the active NHC (Equation 1). The corresponding energy profiles are provided in Fig. S2. As shown in Fig. S2, the active catalyst NHC could be easily formed.

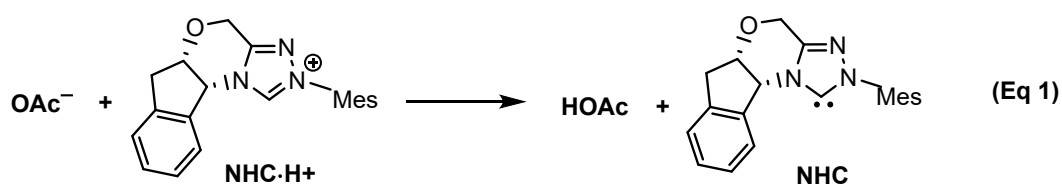

#### 4. Generation of R2

**Fig. S3** The deprotonation of Pre-R2 by base ( $K_2CO_3$ ) generating R2.

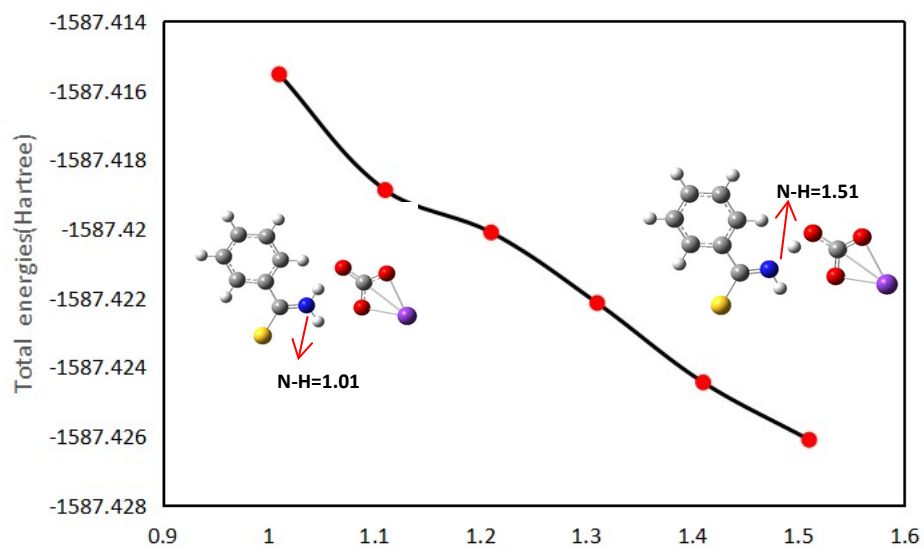

The **Pre-R2** was firstly deprotonated by base ( $K_2CO_3$ ) to generate the real reactant **R2**. However, for the deprotonation by  $KCO_3^-$ , we can not locate the transition state despite of lots of attempts. We scanned the changes of N - H bond. Fig.S3 shows that with the aid of  $KCO_3^-$ , formation of **R2** is barrierless.



**Fig. S4** The deprotonation of Pre-R2 by additive (LiOAc) generating R2.

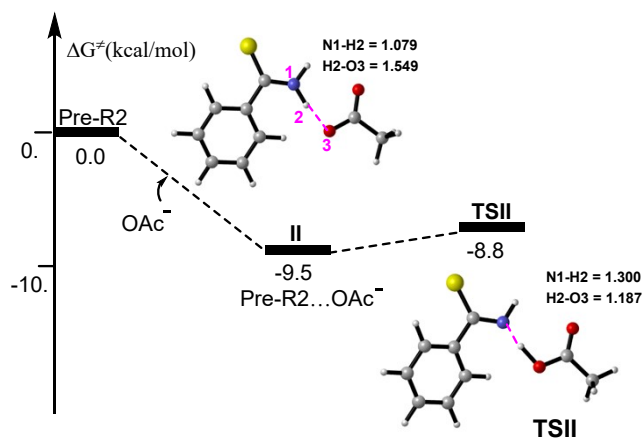

We then examined the deprotonation of **Pre-R2** by LiOAc. As shown in Fig. S4, the energy barrier is estimated to be 0.7 kcal/mol, indicating that this step can happen under the experimental condition.

**Fig. S5** Unfavorable pathways and optimized structures for steps 1-2. Bond distances are given in Å.

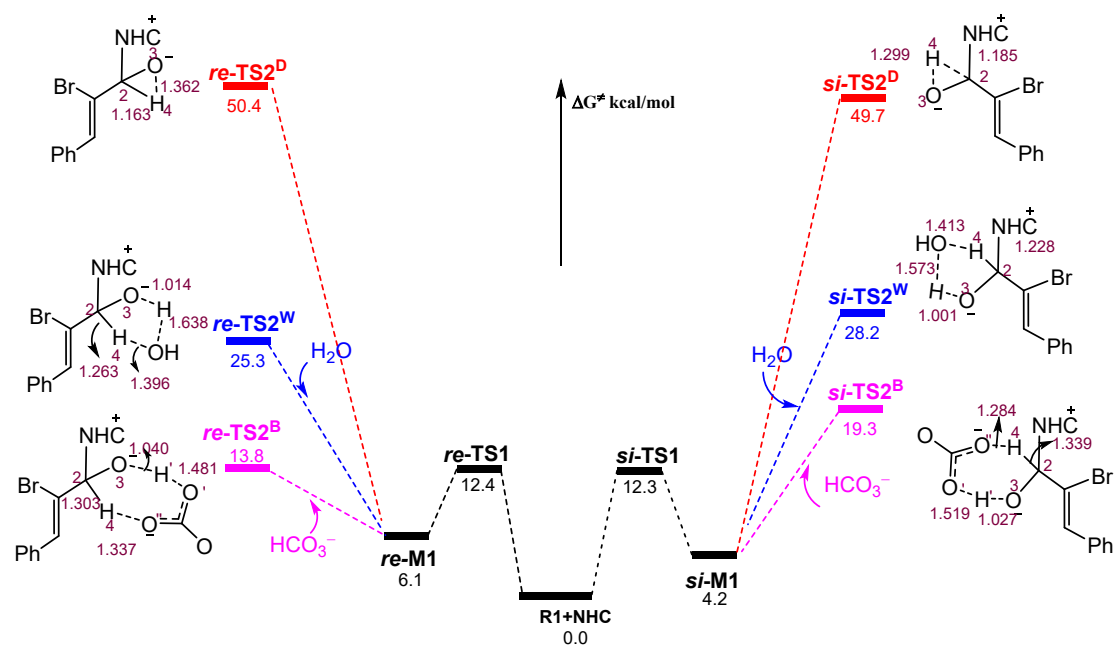

**Fig. S6** Unfavorable pathways and optimized structures for steps 2-4. Bond distances are given in Å.

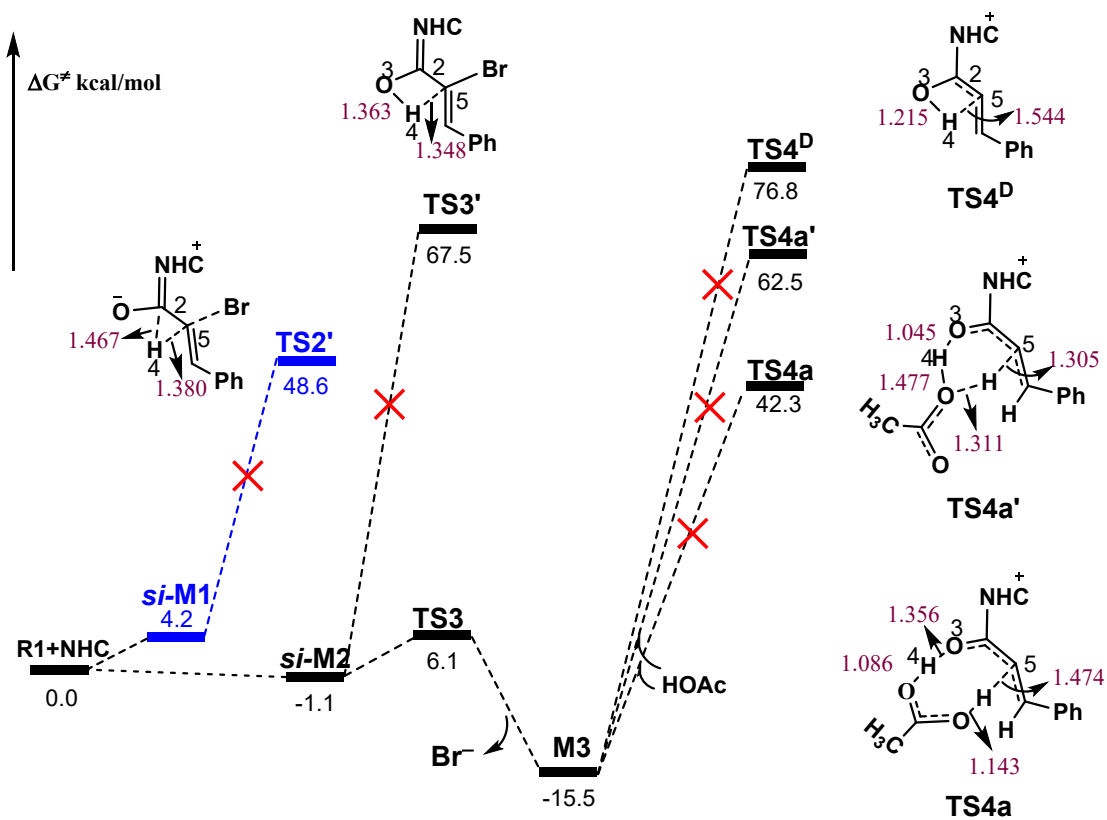

## Conformation search of TS5

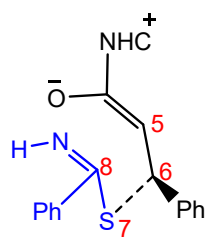

**TS5**

**Table S4. Energies of different conformations of the stereoselective transition states (TS5s).**

| species        | Dihedral angle<br>C5-C6-S7-C8 | Free energies<br>(a.u.) | relative energies<br>(kcal/mol) |
|----------------|-------------------------------|-------------------------|---------------------------------|
| <b>TS5R</b>    | 11.60                         | -2401.8367411           | 4.0                             |
| <b>TS5R'</b>   | 70.27                         | -2401.8289582           | 8.9                             |
| <b>TS5R''</b>  | -81.88                        | -2401.8253568           | 11.2                            |
| <b>TS5R'''</b> | -165.38                       | -2401.8264793           | 10.5                            |
| <b>TS5S</b>    | 7.32                          | -2401.8431944           | 0.0                             |
| <b>TS5S'</b>   | 66.57                         | -2401.8369836           | 3.9                             |
| <b>TS5S''</b>  | 149.99                        | -2401.8304274           | 8.0                             |
| <b>TS5S'''</b> | -83.36                        | -2401.8306087           | 7.9                             |

**Fig. S7** Possible pathways for 1,5-proton transfer. Bond distances are given in Å.

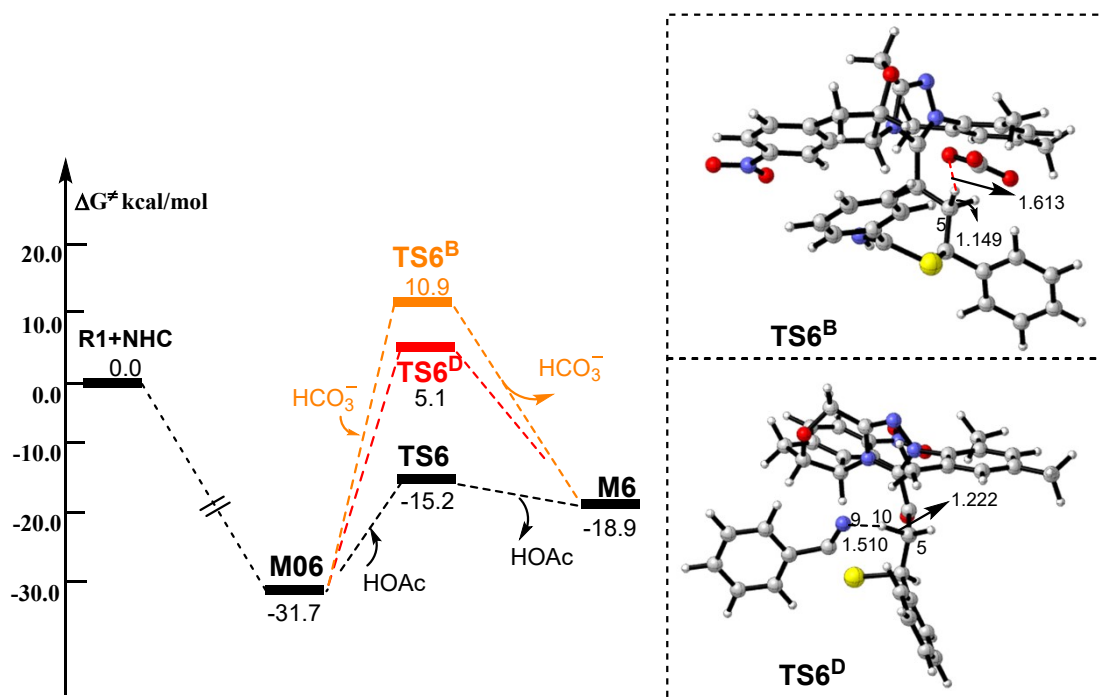

**Fig. S8** The pathways of debromination with/without NHC.

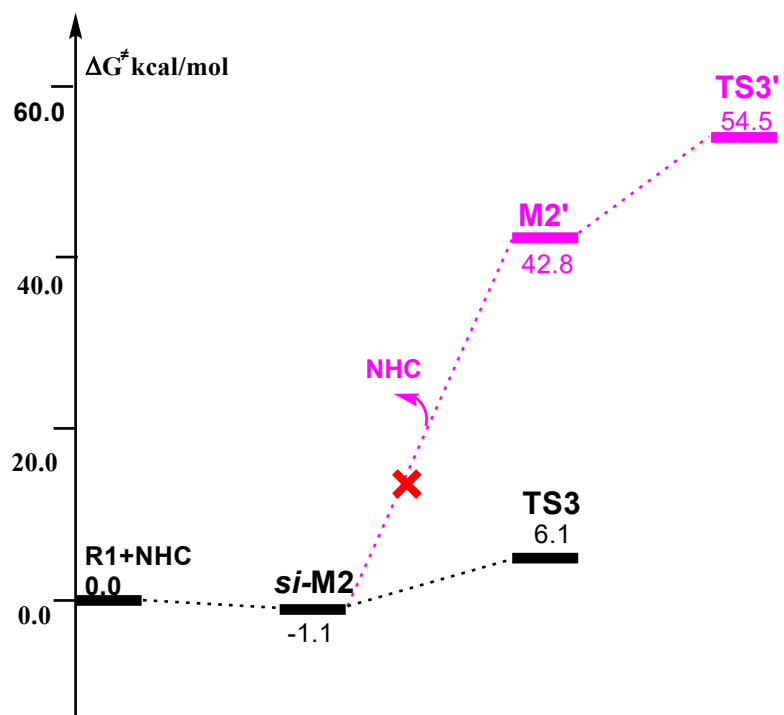

## Coordinates

### NHC

|   |             |             |             |
|---|-------------|-------------|-------------|
| C | 5.53451800  | -0.11320600 | 1.21334700  |
| C | 4.45849800  | -0.75240300 | 0.58926500  |
| C | 3.88155900  | -1.89068100 | 1.13129700  |
| C | 4.43226600  | -2.37011200 | 2.31425400  |
| C | 5.50781200  | -1.76180200 | 2.95525600  |
| C | 6.06606100  | -0.61757300 | 2.39712600  |
| C | 5.95162000  | 1.10771300  | 0.43760800  |
| C | 5.32428700  | 0.84663400  | -0.95082600 |
| C | 4.07174900  | -0.03120100 | -0.67944900 |
| H | 3.03610800  | -2.38679200 | 0.67042100  |
| H | 5.89234000  | -2.18950500 | 3.87280800  |
| H | 6.90571500  | -0.13026000 | 2.88191500  |
| H | 5.52939200  | 2.00502600  | 0.90583300  |
| H | 6.02053100  | 0.24051900  | -1.53618700 |
| H | 7.03385200  | 1.24438000  | 0.38141000  |
| H | 3.85800300  | -0.71064700 | -1.50743400 |
| N | 2.90454600  | 0.83062700  | -0.48809900 |
| O | 5.06616100  | 1.98126300  | -1.74390600 |
| C | 1.66035800  | 0.40368900  | -0.09898600 |
| C | 2.90177300  | 2.17673700  | -0.74881500 |
| N | 0.99435300  | 1.57423700  | -0.14199300 |
| N | 1.72482700  | 2.67728700  | -0.53955700 |
| C | 4.14001200  | 2.89387100  | -1.18660900 |
| H | 4.57782700  | 3.44340200  | -0.34245400 |
| H | 3.89839100  | 3.61857300  | -1.96582700 |
| C | -0.38179200 | 1.77047700  | 0.20684100  |
| C | -0.67548100 | 2.44589900  | 1.39400100  |
| C | -1.37867800 | 1.30280000  | -0.65472700 |
| C | -2.01799900 | 2.64325000  | 1.71683400  |
| C | -2.70562300 | 1.51714700  | -0.28713500 |
| C | -3.04377800 | 2.18358000  | 0.89194800  |
| H | -2.26600200 | 3.16744500  | 2.63676100  |
| H | -3.49603500 | 1.16052900  | -0.94383300 |
| C | -4.48914200 | 2.37659700  | 1.27046200  |
| N | 3.85923000  | -3.58340300 | 2.91258700  |
| O | 2.95198900  | -4.13523200 | 2.31665800  |
| O | 4.32594300  | -3.97068100 | 3.96988800  |
| H | -5.09329200 | 2.64846300  | 0.40050300  |
| H | -4.90998500 | 1.45411700  | 1.68451100  |
| H | -4.60234900 | 3.16018000  | 2.02328200  |
| C | -1.02669200 | 0.59920000  | -1.93696000 |
| H | -1.92509000 | 0.40042600  | -2.52486800 |

|   |             |             |             |
|---|-------------|-------------|-------------|
| H | -0.34572300 | 1.20614600  | -2.54239400 |
| H | -0.52414200 | -0.35098900 | -1.73716600 |
| C | 0.42723400  | 2.93718000  | 2.29225800  |
| H | 0.99467800  | 3.74017400  | 1.81259200  |
| H | 0.02012700  | 3.31382800  | 3.23276700  |
| H | 1.13366700  | 2.13225700  | 2.51925000  |

**R1**

|    |             |             |             |
|----|-------------|-------------|-------------|
| C  | 0.29596000  | 0.76569600  | 0.21390500  |
| C  | 1.06527200  | 1.86712700  | 0.22877100  |
| C  | 2.53051900  | 1.71892000  | 0.38236400  |
| C  | -1.14753600 | 0.54926300  | 0.10220700  |
| C  | -1.62671300 | -0.70902100 | 0.50244400  |
| C  | -2.06496200 | 1.48936200  | -0.39363600 |
| C  | -2.97991100 | -1.01237800 | 0.44370400  |
| C  | -3.41715600 | 1.17693700  | -0.46377100 |
| H  | -1.72364800 | 2.45580500  | -0.73871400 |
| C  | -3.88086200 | -0.06633400 | -0.03957700 |
| H  | -3.33053200 | -1.98615700 | 0.76953600  |
| H  | -4.11368200 | 1.91095600  | -0.85569800 |
| H  | -0.92279600 | -1.44969900 | 0.87225200  |
| H  | -4.93967400 | -0.29925800 | -0.09241500 |
| Br | 0.46715200  | 3.64925300  | 0.13077300  |
| H  | 0.86660000  | -0.15684200 | 0.33479400  |
| O  | 3.31804800  | 2.62994600  | 0.43952000  |
| H  | 2.85735500  | 0.66192600  | 0.44541500  |

**R2**

|   |             |             |             |
|---|-------------|-------------|-------------|
| C | 0.13104900  | 0.22815600  | 0.34699400  |
| S | 1.82184600  | -0.13202000 | 0.59634600  |
| N | -0.66889300 | -0.36923700 | -0.47338200 |
| H | -0.12835500 | -1.09371700 | -0.95057600 |
| C | -0.50899900 | 1.34661700  | 1.14887600  |
| C | 0.19959800  | 2.08866700  | 2.09704900  |
| C | -1.85947800 | 1.65693000  | 0.94137200  |
| C | -0.41921700 | 3.11019200  | 2.81483800  |
| H | 1.24468800  | 1.84562500  | 2.25699900  |
| C | -2.47963000 | 2.67576700  | 1.65574900  |
| H | -2.40586100 | 1.07706900  | 0.20582600  |
| C | -1.76100200 | 3.41009200  | 2.59837000  |
| H | 0.15244900  | 3.67456100  | 3.54677600  |
| H | -3.52790200 | 2.90019300  | 1.47651200  |
| H | -2.24352500 | 4.20775500  | 3.15663500  |



**HOAc**

|   |             |             |             |
|---|-------------|-------------|-------------|
| H | 1.72054400  | -0.80114900 | -0.00000700 |
| C | 0.09155600  | 0.12185200  | 0.00001100  |
| O | 0.77851900  | -1.03550500 | -0.00001700 |
| O | 0.63855000  | 1.19662900  | 0.00004100  |
| C | -1.39089700 | -0.11237400 | -0.00000400 |
| H | -1.67201100 | -0.69301400 | 0.88180800  |
| H | -1.91045900 | 0.84385000  | 0.00006100  |
| H | -1.67200800 | -0.69288900 | -0.88190000 |

**HCO<sub>3</sub><sup>-</sup>**

|   |             |             |             |
|---|-------------|-------------|-------------|
| H | 1.67806800  | -0.43436400 | 0.00002300  |
| C | -0.12892700 | 0.08075400  | 0.00000300  |
| O | -1.29368100 | -0.33372900 | -0.00001300 |
| O | 0.34572600  | 1.23594000  | 0.00000800  |
| O | 0.85993600  | -0.94507300 | 0.00001700  |

**H<sub>2</sub>CO<sub>3</sub>**

|   |             |             |            |
|---|-------------|-------------|------------|
| H | -1.52652600 | -1.18854900 | 3.13453000 |
| H | -2.46910000 | 0.08228500  | 1.81114200 |
| C | -3.38074600 | -1.43350000 | 2.61484900 |
| O | -4.38343400 | -2.07149500 | 2.71345400 |
| O | -3.36055800 | -0.22651300 | 2.01839000 |
| O | -2.20391000 | -1.87621400 | 3.09525000 |

**H<sub>2</sub>O**

|   |            |            |             |
|---|------------|------------|-------------|
| O | 0.02507700 | 0.00000000 | 0.01796700  |
| H | 0.06642800 | 0.00000000 | 0.98026500  |
| H | 0.94856500 | 0.00000000 | -0.25635700 |

**HBr**

|    |            |            |             |
|----|------------|------------|-------------|
| H  | 0.00000000 | 0.00000000 | -1.37264400 |
| Br | 0.00000000 | 0.00000000 | 0.03921800  |

**re-TS1**

|   |             |             |             |
|---|-------------|-------------|-------------|
| C | -4.99309000 | 0.50876400  | 0.43545300  |
| C | -3.64436800 | 0.17090800  | 0.52300400  |
| C | -3.17244000 | -1.07168600 | 0.12102400  |
| C | -4.11622400 | -1.95817200 | -0.37881500 |
| C | -5.47391400 | -1.65966300 | -0.47302000 |
| C | -5.91853900 | -0.41028500 | -0.05866300 |
| C | -5.23070400 | 1.91163900  | 0.92738100  |
| C | -3.82284100 | 2.53704700  | 1.08037300  |
| C | -2.81870500 | 1.32583300  | 1.05099100  |

|    |             |             |             |
|----|-------------|-------------|-------------|
| H  | -2.12592500 | -1.34818300 | 0.21678800  |
| H  | -6.15533400 | -2.40034600 | -0.87278800 |
| H  | -6.97097800 | -0.15546300 | -0.13174600 |
| H  | -5.84042600 | 2.51244800  | 0.24555800  |
| H  | -3.72729300 | 3.07997300  | 2.02112400  |
| H  | -5.74711700 | 1.89575500  | 1.89296100  |
| H  | -2.41360800 | 1.11379300  | 2.04294100  |
| N  | -1.70155400 | 1.61013600  | 0.16008300  |
| O  | -3.55197600 | 3.51188900  | 0.08581700  |
| C  | -0.44251000 | 1.11069800  | 0.19581100  |
| C  | -1.89626600 | 2.28331500  | -1.01802700 |
| N  | 0.04625000  | 1.50152400  | -0.98777800 |
| N  | -0.83051600 | 2.24190200  | -1.75407400 |
| C  | -3.19902400 | 2.99592000  | -1.18628100 |
| H  | -3.97195900 | 2.32371400  | -1.58462300 |
| H  | -3.08781900 | 3.83951600  | -1.86848100 |
| C  | 1.30848000  | 1.10538200  | -1.54219100 |
| C  | 1.48446500  | -0.24554500 | -1.86388000 |
| C  | 2.29719900  | 2.07051700  | -1.73562400 |
| C  | 2.72122000  | -0.62001000 | -2.38442500 |
| C  | 3.51415300  | 1.64593400  | -2.27039900 |
| C  | 3.74159500  | 0.30951100  | -2.59862500 |
| H  | 2.89600000  | -1.66613500 | -2.62489300 |
| H  | 4.30352500  | 2.37779500  | -2.42399000 |
| C  | 5.06144800  | -0.13952600 | -3.16734600 |
| C  | 2.20090100  | -1.30872700 | 1.30070000  |
| C  | 1.57225800  | -0.15925600 | 1.55279600  |
| H  | 1.51426100  | -2.15641900 | 1.32153100  |
| C  | 3.60565800  | -1.63255900 | 1.02446200  |
| C  | 4.01674800  | -2.95706400 | 1.23397500  |
| C  | 4.53882500  | -0.71529200 | 0.51837400  |
| C  | 5.32554100  | -3.35060100 | 0.98242900  |
| H  | 3.29548600  | -3.67988300 | 1.60561500  |
| C  | 5.84642200  | -1.11317100 | 0.26068100  |
| H  | 4.23812900  | 0.30337800  | 0.30714200  |
| C  | 6.24762300  | -2.42679800 | 0.49637800  |
| H  | 5.62351600  | -4.37901400 | 1.16110400  |
| H  | 6.55443700  | -0.39104100 | -0.13530400 |
| H  | 7.27066500  | -2.72925400 | 0.29496800  |
| Br | 2.39441100  | 1.53628600  | 1.74840100  |
| C  | 0.08456000  | -0.11417600 | 1.81701200  |
| H  | -0.17282500 | 0.72590900  | 2.49325300  |
| O  | -0.60134200 | -1.14139100 | 1.77239600  |
| N  | -3.65598600 | -3.27359900 | -0.84682500 |

|   |             |             |             |
|---|-------------|-------------|-------------|
| O | -2.45550900 | -3.47128100 | -0.89156100 |
| O | -4.50346800 | -4.08845300 | -1.17007900 |
| H | 5.83062200  | 0.62704800  | -3.04403900 |
| H | 4.97268300  | -0.35401100 | -4.23780800 |
| H | 5.40486600  | -1.05444900 | -2.67550900 |
| C | 2.05891900  | 3.50484200  | -1.35285100 |
| H | 1.25442400  | 3.94703900  | -1.94754800 |
| H | 1.76663200  | 3.57214400  | -0.30007500 |
| H | 2.96452000  | 4.09726000  | -1.49814700 |
| C | 0.38213700  | -1.25207500 | -1.65545700 |
| H | 0.15422900  | -1.39510800 | -0.59261700 |
| H | -0.54002100 | -0.93108100 | -2.15269400 |
| H | 0.66742000  | -2.22096100 | -2.07036600 |

**re-M1**

|   |             |             |             |
|---|-------------|-------------|-------------|
| C | 4.13161300  | -4.44549000 | 0.23130900  |
| C | 3.44341800  | -3.28074600 | -0.10466200 |
| C | 2.95326400  | -3.05812000 | -1.38515600 |
| C | 3.17423200  | -4.07067000 | -2.30889400 |
| C | 3.86913800  | -5.24224200 | -2.01563800 |
| C | 4.35615200  | -5.43154700 | -0.72820000 |
| C | 4.53898800  | -4.43060500 | 1.68086000  |
| C | 3.72054700  | -3.28349800 | 2.31086700  |
| C | 3.30128100  | -2.37254900 | 1.10183400  |
| H | 2.45365900  | -2.12271000 | -1.63309300 |
| H | 4.00784300  | -5.98689200 | -2.78949500 |
| H | 4.89225000  | -6.34076100 | -0.47597500 |
| H | 4.33849000  | -5.37075200 | 2.20277600  |
| H | 4.30521900  | -2.71421000 | 3.03428900  |
| H | 5.61126600  | -4.22613400 | 1.77383300  |
| H | 3.93039200  | -1.48409600 | 1.02006300  |
| N | 1.91955600  | -1.93614000 | 1.27587600  |
| O | 2.61073800  | -3.76633600 | 3.05739300  |
| C | 1.31280200  | -0.79672300 | 0.89370000  |
| C | 0.96008500  | -2.80075500 | 1.72128000  |
| N | 0.01239100  | -1.03238900 | 1.08709600  |
| N | -0.22227000 | -2.27702400 | 1.62126000  |
| C | 1.44712000  | -4.08409500 | 2.31297600  |
| H | 1.64368700  | -4.82867300 | 1.52986500  |
| H | 0.70964500  | -4.48920400 | 3.00616100  |
| C | -1.10972300 | -0.20531000 | 0.72719700  |
| C | -1.40320400 | -0.06324500 | -0.63387800 |
| C | -1.86519700 | 0.37811900  | 1.74413200  |
| C | -2.47082200 | 0.76688400  | -0.96417100 |

|    |             |             |             |
|----|-------------|-------------|-------------|
| C  | -2.93296500 | 1.18924500  | 1.35735800  |
| C  | -3.23765600 | 1.40549100  | 0.01376500  |
| H  | -2.70960400 | 0.91970300  | -2.01379700 |
| H  | -3.53160000 | 1.66896600  | 2.12769800  |
| C  | -4.35056800 | 2.33311700  | -0.39323500 |
| C  | 1.04925200  | 2.24752300  | -0.99932900 |
| C  | 1.32441500  | 1.62174400  | 0.14162600  |
| H  | 1.47078200  | 1.72110800  | -1.85736000 |
| C  | 0.30290500  | 3.48791300  | -1.25819700 |
| C  | -0.79107200 | 3.88985100  | -0.47858500 |
| C  | 0.65856200  | 4.26808600  | -2.36658500 |
| C  | -1.48153400 | 5.05859700  | -0.78298800 |
| H  | -1.10546300 | 3.27746100  | 0.35945600  |
| C  | -0.02994200 | 5.43842900  | -2.66627800 |
| H  | 1.49031600  | 3.95128900  | -2.98989800 |
| C  | -1.10193200 | 5.83967600  | -1.87265300 |
| H  | -2.32528100 | 5.35692300  | -0.16760300 |
| H  | 0.26662000  | 6.03455200  | -3.52369100 |
| H  | -1.64363900 | 6.75094200  | -2.10621800 |
| Br | 0.92868800  | 2.30564000  | 1.87654600  |
| C  | 2.13230700  | 0.32071800  | 0.18482000  |
| H  | 2.93303400  | 0.53070700  | 0.94524300  |
| O  | 2.53819500  | -0.15277700 | -0.97586500 |
| N  | 2.63450800  | -3.90432700 | -3.66657600 |
| O  | 1.89861000  | -2.95721100 | -3.87195500 |
| O  | 2.94606900  | -4.73262500 | -4.50607700 |
| H  | -3.94070600 | 3.21667000  | -0.89495300 |
| H  | -4.92900300 | 2.66884700  | 0.47044700  |
| H  | -5.03378900 | 1.84763200  | -1.09621400 |
| C  | -1.54929500 | 0.13407100  | 3.19373400  |
| H  | -1.78645700 | -0.89671500 | 3.47488300  |
| H  | -0.48874800 | 0.30237900  | 3.39982500  |
| H  | -2.13094200 | 0.80521400  | 3.82889800  |
| C  | -0.60660200 | -0.78594200 | -1.68637700 |
| H  | 0.44942700  | -0.48602200 | -1.68512400 |
| H  | -0.64067500 | -1.86893200 | -1.51634100 |
| H  | -1.02214400 | -0.59079300 | -2.67685000 |

**si-TS1**

|   |            |             |             |
|---|------------|-------------|-------------|
| C | 5.05110600 | -0.08921700 | 0.27917300  |
| C | 3.68314700 | 0.14382100  | 0.40529100  |
| C | 3.06861200 | 1.23314700  | -0.19748100 |
| C | 3.89109400 | 2.09769100  | -0.90608700 |
| C | 5.26606700 | 1.91301100  | -1.02928900 |

|    |             |             |             |
|----|-------------|-------------|-------------|
| C  | 5.85195500  | 0.80234600  | -0.43371800 |
| C  | 5.45091100  | -1.36652400 | 0.96833900  |
| C  | 4.12625100  | -2.02802600 | 1.43048200  |
| C  | 3.00492300  | -0.94800300 | 1.20148600  |
| H  | 1.99676800  | 1.40809800  | -0.14740000 |
| H  | 5.84956600  | 2.62630200  | -1.59827000 |
| H  | 6.91850800  | 0.63031600  | -0.53743100 |
| H  | 6.00325600  | -2.04450700 | 0.30939600  |
| H  | 4.16690800  | -2.28507700 | 2.48895000  |
| H  | 6.09673600  | -1.16072900 | 1.82776000  |
| H  | 2.61098400  | -0.58833700 | 2.15591300  |
| N  | 1.88314900  | -1.50047400 | 0.46057900  |
| O  | 3.87098100  | -3.26487900 | 0.78586500  |
| C  | 0.61274700  | -1.03427900 | 0.43281500  |
| C  | 2.02419500  | -2.51415100 | -0.44743400 |
| N  | 0.04617900  | -1.82368000 | -0.48566500 |
| N  | 0.89769000  | -2.75543100 | -1.04371300 |
| C  | 3.36519100  | -3.16638100 | -0.53374900 |
| H  | 4.03690800  | -2.58378700 | -1.18153000 |
| H  | 3.28204200  | -4.17629100 | -0.93624800 |
| C  | -1.32446900 | -1.76604400 | -0.90601000 |
| C  | -1.61650900 | -1.20428600 | -2.14953600 |
| C  | -2.30545000 | -2.25843900 | -0.04051600 |
| C  | -2.95819000 | -1.14508900 | -2.52858000 |
| C  | -3.63111100 | -2.16378800 | -0.45850900 |
| C  | -3.97374100 | -1.61846400 | -1.69757800 |
| H  | -3.21316300 | -0.70854500 | -3.49138800 |
| H  | -4.41759800 | -2.52044600 | 0.20255600  |
| C  | -5.41837500 | -1.54220400 | -2.11436300 |
| C  | -2.43928200 | 0.56105500  | 1.88612600  |
| C  | -1.23535500 | 0.73045300  | 1.33869500  |
| H  | -2.38354000 | 0.01865700  | 2.83131800  |
| C  | -3.78166800 | 0.97721300  | 1.45983000  |
| C  | -4.77102600 | 1.10619000  | 2.44534400  |
| C  | -4.13703500 | 1.19812400  | 0.12167800  |
| C  | -6.06784200 | 1.48012600  | 2.11331000  |
| H  | -4.51054400 | 0.91507700  | 3.48298900  |
| C  | -5.43734500 | 1.56376300  | -0.20942800 |
| H  | -3.40168700 | 1.06241300  | -0.66208700 |
| C  | -6.40551600 | 1.71212800  | 0.78221000  |
| H  | -6.81642700 | 1.58447600  | 2.89243100  |
| H  | -5.69634500 | 1.72654500  | -1.25153200 |
| H  | -7.41835100 | 1.99968900  | 0.51764000  |
| Br | -0.85197500 | 1.72947500  | -0.22742700 |

|   |             |             |             |
|---|-------------|-------------|-------------|
| C | 0.01808500  | 0.19214500  | 1.99464400  |
| H | 0.88270700  | 0.86071600  | 1.79411500  |
| O | -0.03303100 | -0.49727500 | 3.01725800  |
| N | 3.27289900  | 3.25051500  | -1.57719700 |
| O | 2.05763600  | 3.32847500  | -1.56012800 |
| O | 4.01196300  | 4.05667600  | -2.11415600 |
| H | -5.78066900 | -2.52167100 | -2.44513600 |
| H | -5.55911500 | -0.84006100 | -2.93987600 |
| H | -6.04828400 | -1.22220800 | -1.27941700 |
| C | -1.93358500 | -2.86415300 | 1.28607500  |
| H | -1.24432200 | -3.70434600 | 1.14721700  |
| H | -1.43647800 | -2.14087300 | 1.94309100  |
| H | -2.82441200 | -3.23582000 | 1.79685100  |
| C | -0.52059600 | -0.65941400 | -3.02272100 |
| H | 0.00756100  | 0.14529900  | -2.50018600 |
| H | 0.21100600  | -1.43298800 | -3.27355000 |
| H | -0.92993200 | -0.25409100 | -3.95012100 |

**si-M1**

|   |            |             |             |
|---|------------|-------------|-------------|
| C | 5.77207400 | -0.56194700 | 0.52188800  |
| C | 4.46819000 | -0.77956300 | 0.96001800  |
| C | 4.14926000 | -0.86190500 | 2.30960400  |
| C | 5.19641600 | -0.67826600 | 3.20105700  |
| C | 6.51248000 | -0.44940100 | 2.80187000  |
| C | 6.80504000 | -0.39702300 | 1.44529500  |
| C | 5.85195900 | -0.57567100 | -0.98077500 |
| C | 4.38579400 | -0.65055400 | -1.47723100 |
| C | 3.50871000 | -0.92359100 | -0.19656300 |
| H | 3.13515300 | -1.11232500 | 2.61485000  |
| H | 7.28133900 | -0.32060900 | 3.55344200  |
| H | 7.82514900 | -0.22804200 | 1.11496600  |
| H | 6.34451200 | 0.31111700  | -1.39333800 |
| H | 4.24539600 | -1.46773100 | -2.18503000 |
| H | 6.41961700 | -1.44493100 | -1.32725600 |
| H | 3.02350500 | -1.90041800 | -0.19218800 |
| N | 2.42168200 | 0.06562300  | -0.10407400 |
| O | 4.01209400 | 0.50730000  | -2.20938200 |
| C | 1.21021800 | -0.03013000 | 0.46639300  |
| C | 2.53235200 | 1.32893600  | -0.61804600 |
| N | 0.64400000 | 1.15940500  | 0.27370200  |
| N | 1.45426100 | 2.02508300  | -0.40886200 |
| C | 3.76036600 | 1.64168900  | -1.40493500 |
| H | 4.60564400 | 1.87122700  | -0.74012700 |
| H | 3.58493500 | 2.49488400  | -2.06059900 |

|    |             |             |             |
|----|-------------|-------------|-------------|
| C  | -0.67234300 | 1.55051600  | 0.69792100  |
| C  | -0.84954400 | 1.94140700  | 2.02731600  |
| C  | -1.70817700 | 1.50691900  | -0.23858300 |
| C  | -2.14172300 | 2.28354800  | 2.42267300  |
| C  | -2.98034100 | 1.86182700  | 0.20774100  |
| C  | -3.21524100 | 2.24183500  | 1.53109800  |
| H  | -2.31198900 | 2.59190400  | 3.45117600  |
| H  | -3.80839500 | 1.83384500  | -0.49655500 |
| C  | -4.60764900 | 2.57467500  | 1.99723100  |
| C  | -1.73163000 | -1.79967800 | 0.35783300  |
| C  | -0.41496800 | -1.80693600 | 0.14172200  |
| H  | -2.00695600 | -1.39012300 | 1.33156200  |
| C  | -2.87757600 | -2.16944600 | -0.48948100 |
| C  | -2.83635300 | -3.13993800 | -1.49956700 |
| C  | -4.09279400 | -1.51142500 | -0.24533700 |
| C  | -3.97031500 | -3.41671600 | -2.25629000 |
| H  | -1.92282500 | -3.69052900 | -1.68316100 |
| C  | -5.22175800 | -1.78271600 | -1.00910000 |
| H  | -4.14074000 | -0.77547800 | 0.55346200  |
| C  | -5.16231500 | -2.73555900 | -2.02326800 |
| H  | -3.92135100 | -4.17713200 | -3.02969000 |
| H  | -6.14977000 | -1.25647100 | -0.80755100 |
| H  | -6.04261600 | -2.95646800 | -2.61871500 |
| Br | 0.38755500  | -2.35545700 | -1.49906100 |
| C  | 0.64574300  | -1.31239000 | 1.15258200  |
| H  | 0.02447200  | -0.91071300 | 1.99529900  |
| O  | 1.61057200  | -2.14744800 | 1.44606500  |
| N  | 4.90541800  | -0.72744700 | 4.64083200  |
| O  | 3.73878100  | -0.79520100 | 4.98158800  |
| O  | 5.84847300  | -0.68765600 | 5.41332300  |
| H  | -4.59179800 | 3.34095500  | 2.77631900  |
| H  | -5.22812900 | 2.93327500  | 1.17264200  |
| H  | -5.09515700 | 1.68855000  | 2.41856900  |
| C  | -1.45711300 | 1.09529000  | -1.66349200 |
| H  | -2.39572700 | 1.04924400  | -2.21865600 |
| H  | -0.79345200 | 1.80775000  | -2.16457200 |
| H  | -0.98298200 | 0.10994300  | -1.72159100 |
| C  | 0.30933200  | 1.99055200  | 2.98639500  |
| H  | 1.15908200  | 2.52602000  | 2.55164200  |
| H  | 0.02111600  | 2.49901400  | 3.90813100  |
| H  | 0.65213200  | 0.98458300  | 3.25463800  |

**re-M02**

|   |             |            |            |
|---|-------------|------------|------------|
| C | -2.15039400 | 3.28374600 | 1.11198600 |
|---|-------------|------------|------------|

|   |             |             |             |
|---|-------------|-------------|-------------|
| C | -1.20350600 | 2.54794000  | 0.39674000  |
| C | -0.30129000 | 3.15498300  | -0.46769300 |
| C | -0.40723100 | 4.53570200  | -0.58694400 |
| C | -1.34208000 | 5.30215200  | 0.10311100  |
| C | -2.22649400 | 4.66640400  | 0.96640500  |
| C | -2.98983900 | 2.38611100  | 1.98297300  |
| C | -2.23537400 | 1.04232600  | 2.00317600  |
| C | -1.35398100 | 1.06958900  | 0.70546900  |
| H | 0.47408400  | 2.59949700  | -0.99802900 |
| H | -1.35984700 | 6.37553400  | -0.03850100 |
| H | -2.95847400 | 5.24380300  | 1.52157500  |
| H | -3.12198500 | 2.76315400  | 3.00051300  |
| H | -2.91538900 | 0.18839600  | 1.98554500  |
| H | -3.98647800 | 2.25338500  | 1.54764600  |
| H | -1.86093100 | 0.53931500  | -0.10411400 |
| N | -0.08799900 | 0.39380000  | 0.96486400  |
| O | -1.47152000 | 0.87218400  | 3.19057800  |
| C | 0.61857800  | -0.49816100 | 0.24911200  |
| C | 0.58259800  | 0.60963200  | 2.13688800  |
| N | 1.68752100  | -0.77911400 | 0.99502500  |
| N | 1.66927900  | -0.09571000 | 2.18377200  |
| C | -0.14856400 | 1.39066800  | 3.17910900  |
| H | -0.12267400 | 2.46692200  | 2.96966300  |
| H | 0.28635000  | 1.20719200  | 4.16139500  |
| C | 2.84755500  | -1.59437100 | 0.70944500  |
| C | 4.08022800  | -0.94151100 | 0.59395400  |
| C | 2.71135300  | -2.98312400 | 0.63991900  |
| C | 5.19861000  | -1.73808400 | 0.35045100  |
| C | 3.86410000  | -3.72773000 | 0.39984700  |
| C | 5.11088000  | -3.12486300 | 0.23953100  |
| H | 6.16623600  | -1.25390500 | 0.24401800  |
| H | 3.77958200  | -4.80949600 | 0.33318000  |
| C | 6.33204700  | -3.94872300 | -0.07041500 |
| C | -1.72182700 | -2.21194800 | 0.18092800  |
| C | -1.07942700 | -1.90477600 | -0.95081900 |
| H | -1.23766000 | -1.87541200 | 1.09849400  |
| C | -2.96121500 | -2.97170800 | 0.42650000  |
| C | -4.06121700 | -2.97746300 | -0.44183200 |
| C | -3.05966000 | -3.66915200 | 1.63899500  |
| C | -5.20883700 | -3.69248500 | -0.11638900 |
| H | -4.02105300 | -2.41933400 | -1.36890800 |
| C | -4.20348700 | -4.39117900 | 1.95715700  |
| H | -2.22153400 | -3.65086600 | 2.33103800  |
| C | -5.28294500 | -4.40637100 | 1.07719200  |



|    |             |             |             |
|----|-------------|-------------|-------------|
| H  | -6.05260000 | -3.68629900 | -0.79901700 |
| H  | -4.25440500 | -4.93554000 | 2.89457900  |
| H  | -6.17968800 | -4.96578200 | 1.32341000  |
| Br | -1.63452600 | -2.51749300 | -2.65264200 |
| C  | 0.19203800  | -1.06673200 | -1.09363100 |
| H  | 1.78100900  | -1.11831400 | -2.24595900 |
| O  | 1.19268800  | -1.78859900 | -1.67988400 |
| N  | 0.52297900  | 5.22690600  | -1.49446700 |
| O  | 1.28049600  | 4.54274300  | -2.15559600 |
| O  | 0.47655400  | 6.44500800  | -1.53223700 |
| H  | 6.48295700  | -4.01654600 | -1.15294500 |
| H  | 6.23442200  | -4.96669800 | 0.31466700  |
| H  | 7.23240400  | -3.50262200 | 0.35941800  |
| C  | 1.38363200  | -3.66929900 | 0.78633800  |
| H  | 0.75732600  | -3.18558100 | 1.54266400  |
| H  | 0.84734200  | -3.64838400 | -0.16703700 |
| H  | 1.52457000  | -4.71117700 | 1.08134500  |
| C  | 4.23135800  | 0.54842600  | 0.75113500  |
| H  | 3.41146700  | 1.08978200  | 0.27374500  |
| H  | 4.25502700  | 0.82231600  | 1.81096200  |
| H  | 5.17002800  | 0.87466600  | 0.29728800  |
| C  | 2.56544700  | 0.94320400  | -2.29730700 |
| O  | 2.54280500  | -0.14149500 | -2.94615600 |
| O  | 1.84684000  | 1.19802400  | -1.29666400 |
| H  | -0.07339600 | -0.17309800 | -1.68408700 |
| C  | 3.53746000  | 2.00367800  | -2.78703500 |
| H  | 3.21488900  | 2.35995100  | -3.76963900 |
| H  | 3.57889300  | 2.84744100  | -2.09872400 |
| H  | 4.52944600  | 1.56176000  | -2.91053600 |

**re-TS2**

|   |             |            |             |
|---|-------------|------------|-------------|
| C | -2.06594000 | 3.43180000 | 1.51230000  |
| C | -1.30790500 | 2.50224200 | 0.79961500  |
| C | -0.58503200 | 2.86200900 | -0.33299200 |
| C | -0.66618100 | 4.19643200 | -0.71325300 |
| C | -1.42943200 | 5.14494800 | -0.03824000 |
| C | -2.13767500 | 4.75798100 | 1.09236400  |
| C | -2.72421000 | 2.79226800 | 2.70672700  |
| C | -2.04484000 | 1.41293500 | 2.85393300  |
| C | -1.40619900 | 1.13464100 | 1.44735800  |
| H | 0.02050400  | 2.16827300 | -0.91513700 |
| H | -1.44707800 | 6.16595200 | -0.39865000 |
| H | -2.72532900 | 5.48512200 | 1.64338900  |
| H | -2.60844000 | 3.37110800 | 3.62761400  |

|    |             |             |             |
|----|-------------|-------------|-------------|
| H  | -2.76551100 | 0.63114000  | 3.09680700  |
| H  | -3.79827300 | 2.66816200  | 2.53073700  |
| H  | -2.05944000 | 0.47756100  | 0.87586300  |
| N  | -0.10167700 | 0.49528000  | 1.58788900  |
| O  | -1.11154200 | 1.37899200  | 3.92124400  |
| C  | 0.56436300  | -0.42798500 | 0.84032300  |
| C  | 0.74482800  | 0.91078200  | 2.58710900  |
| N  | 1.77513300  | -0.51478900 | 1.42981600  |
| N  | 1.88531800  | 0.30956500  | 2.52384200  |
| C  | 0.18810900  | 1.84642100  | 3.60794900  |
| H  | 0.17713700  | 2.87985200  | 3.23622200  |
| H  | 0.78728500  | 1.80559100  | 4.51801900  |
| C  | 2.94650000  | -1.26755800 | 1.05444000  |
| C  | 3.92910600  | -0.61924200 | 0.31077300  |
| C  | 3.07831600  | -2.57851100 | 1.51861000  |
| C  | 5.08550400  | -1.34301400 | 0.01125800  |
| C  | 4.25095200  | -3.25436300 | 1.20243500  |
| C  | 5.26219400  | -2.65357200 | 0.44605500  |
| H  | 5.86409900  | -0.86359100 | -0.57669500 |
| H  | 4.37836700  | -4.27744200 | 1.54854700  |
| C  | 6.50641700  | -3.42570400 | 0.09395500  |
| C  | -1.85926000 | -2.47111300 | -0.27871900 |
| C  | -1.27270200 | -1.32443100 | -0.63796700 |
| H  | -1.16375300 | -3.14244700 | 0.22705200  |
| C  | -3.19820000 | -3.04687800 | -0.47575200 |
| C  | -4.36211900 | -2.31879400 | -0.76606500 |
| C  | -3.31072100 | -4.43714200 | -0.31276700 |
| C  | -5.58330100 | -2.96914800 | -0.90857800 |
| H  | -4.31915200 | -1.24393800 | -0.87686100 |
| C  | -4.52958700 | -5.08517700 | -0.46327900 |
| H  | -2.42025700 | -5.01228400 | -0.07371900 |
| C  | -5.67414600 | -4.35088700 | -0.76442400 |
| H  | -6.47227100 | -2.38780100 | -1.13277200 |
| H  | -4.58643500 | -6.16229600 | -0.34169900 |
| H  | -6.63052400 | -4.85074500 | -0.88108600 |
| Br | -2.17118500 | 0.02138800  | -1.66980700 |
| C  | 0.19091900  | -1.05745700 | -0.42059500 |
| H  | 1.59554000  | -1.94472700 | -1.37609200 |
| O  | 0.96992700  | -2.19977900 | -0.65367800 |
| N  | 0.11086700  | 4.63811500  | -1.88205400 |
| O  | 0.91034100  | 3.85415400  | -2.35583000 |
| O  | -0.08724900 | 5.76697500  | -2.29951600 |
| H  | 6.31728800  | -4.10109400 | -0.74700600 |
| H  | 6.84385800  | -4.03661900 | 0.93573500  |

|   |            |             |             |
|---|------------|-------------|-------------|
| H | 7.32180700 | -2.75792800 | -0.19346400 |
| C | 1.97081800 | -3.22930000 | 2.29544000  |
| H | 1.65317000 | -2.60907700 | 3.13978400  |
| H | 1.10686600 | -3.38084100 | 1.63974700  |
| H | 2.28576800 | -4.20025100 | 2.68243100  |
| C | 3.77267400 | 0.81246900  | -0.12332600 |
| H | 2.75610600 | 1.03130100  | -0.46276800 |
| H | 3.99964400 | 1.49346300  | 0.70457800  |
| H | 4.45797200 | 1.03669000  | -0.94375900 |
| C | 2.02961200 | 0.15406300  | -2.77831400 |
| O | 2.47853500 | -0.97365400 | -2.53202600 |
| O | 0.99049700 | 0.66656300  | -2.20662600 |
| H | 0.56855300 | -0.13417100 | -1.32680900 |
| C | 2.69467800 | 1.04981700  | -3.79719500 |
| H | 1.97816300 | 1.28887200  | -4.58734700 |
| H | 2.97232000 | 1.99420800  | -3.32201000 |
| H | 3.57292000 | 0.56558500  | -4.22314200 |

**re-TS2<sup>B</sup>**

|   |             |             |             |
|---|-------------|-------------|-------------|
| C | 3.75879200  | -4.19097300 | 0.21569500  |
| C | 3.00761400  | -3.07648100 | -0.15462400 |
| C | 2.48913400  | -2.93208400 | -1.43413600 |
| C | 2.72817500  | -3.97772900 | -2.31650400 |
| C | 3.47229400  | -5.10852000 | -1.98294000 |
| C | 4.00049400  | -5.21266100 | -0.70195000 |
| C | 4.22044600  | -4.06889400 | 1.64519600  |
| C | 3.37401300  | -2.92189300 | 2.24271200  |
| C | 2.86271600  | -2.11344400 | 1.00330000  |
| H | 1.96363700  | -2.02041600 | -1.71207800 |
| H | 3.62206900  | -5.88346800 | -2.72405900 |
| H | 4.58483400  | -6.08397800 | -0.42340400 |
| H | 4.09127300  | -4.98519200 | 2.22885600  |
| H | 3.96013900  | -2.26968800 | 2.89065500  |
| H | 5.28318800  | -3.80413800 | 1.67396100  |
| H | 3.44739000  | -1.20663800 | 0.85339600  |
| N | 1.47320900  | -1.71967300 | 1.19980000  |
| O | 2.33322800  | -3.41903400 | 3.08123300  |
| C | 0.80656600  | -0.61427800 | 0.77931400  |
| C | 0.57597600  | -2.55505200 | 1.79685500  |
| N | -0.47574300 | -0.86763600 | 1.11146300  |
| N | -0.62559800 | -2.06865600 | 1.77447100  |
| C | 1.13585500  | -3.78899400 | 2.42564000  |
| H | 1.30440900  | -4.56707400 | 1.66745400  |
| H | 0.44864500  | -4.17835100 | 3.17777700  |

|    |             |             |             |
|----|-------------|-------------|-------------|
| C  | -1.63540600 | -0.16995200 | 0.63924300  |
| C  | -1.84429500 | -0.10648900 | -0.74409900 |
| C  | -2.49096000 | 0.42227900  | 1.56826600  |
| C  | -2.92592500 | 0.65238000  | -1.18596200 |
| C  | -3.57389900 | 1.14801100  | 1.07434300  |
| C  | -3.79098500 | 1.29234400  | -0.29550900 |
| H  | -3.09779400 | 0.74561400  | -2.25579700 |
| H  | -4.24583300 | 1.63290900  | 1.77848000  |
| C  | -4.91558400 | 2.14498000  | -0.82097300 |
| C  | 0.59675500  | 2.25064000  | -1.40002600 |
| C  | 0.69031700  | 1.69937500  | -0.18446000 |
| H  | 1.15674200  | 1.67808900  | -2.13912100 |
| C  | -0.08203000 | 3.45908500  | -1.88169400 |
| C  | -1.26390700 | 3.97436900  | -1.32453700 |
| C  | 0.44069800  | 4.09060100  | -3.02071300 |
| C  | -1.86920500 | 5.10218700  | -1.87224700 |
| H  | -1.70696400 | 3.48095900  | -0.46611800 |
| C  | -0.16497600 | 5.21550300  | -3.56554600 |
| H  | 1.34394600  | 3.68778600  | -3.47075900 |
| C  | -1.32437100 | 5.73059500  | -2.99008900 |
| H  | -2.78024500 | 5.49022400  | -1.42478800 |
| H  | 0.26791500  | 5.68899000  | -4.44184800 |
| H  | -1.80196800 | 6.60936700  | -3.41283800 |
| Br | 0.02606900  | 2.55213400  | 1.39426200  |
| C  | 1.50507500  | 0.48327500  | 0.09723800  |
| H  | 3.60088700  | 0.36438400  | -0.62255600 |
| O  | 2.21197400  | -0.01087000 | -0.97315600 |
| N  | 2.15536700  | -3.89857700 | -3.66630600 |
| O  | 1.40380800  | -2.97323100 | -3.91339400 |
| O  | 2.45245600  | -4.77375100 | -4.46489300 |
| H  | -4.51762000 | 3.04417800  | -1.30401600 |
| H  | -5.58801100 | 2.46012300  | -0.01948600 |
| H  | -5.50429400 | 1.60877400  | -1.57130800 |
| C  | -2.21646400 | 0.31374300  | 3.04190200  |
| H  | -2.31583100 | -0.71812300 | 3.39071200  |
| H  | -1.19367300 | 0.63820600  | 3.25788200  |
| H  | -2.90533100 | 0.94264000  | 3.61008000  |
| C  | -0.95993300 | -0.84618700 | -1.71488600 |
| H  | 0.06672700  | -0.46142800 | -1.73157100 |
| H  | -0.91565500 | -1.91062200 | -1.45460500 |
| H  | -1.36502100 | -0.76758600 | -2.72596800 |
| H  | 2.41484300  | 0.79289800  | 0.97854800  |
| C  | 4.65525900  | 0.90453600  | 0.99292400  |
| O  | 5.75152200  | 1.19042800  | 1.46641000  |

|   |             |             |              |
|---|-------------|-------------|--------------|
| O | 4. 57031000 | 0. 57477400 | -0. 31059200 |
| O | 3. 54883500 | 0. 85864100 | 1. 68452600  |

**re-TS2<sup>D</sup>**

|   |              |              |              |
|---|--------------|--------------|--------------|
| C | 4. 27803200  | -2. 52497500 | 0. 27832800  |
| C | 3. 19923400  | -1. 87018700 | -0. 31417100 |
| C | 2. 79748400  | -2. 15903800 | -1. 61154200 |
| C | 3. 51464700  | -3. 14035900 | -2. 28302900 |
| C | 4. 59501900  | -3. 81490800 | -1. 72057600 |
| C | 4. 98330700  | -3. 50051300 | -0. 42416900 |
| C | 4. 51945100  | -2. 02131900 | 1. 67552600  |
| C | 3. 31143700  | -1. 11208800 | 2. 00503400  |
| C | 2. 59114200  | -0. 85463400 | 0. 62865800  |
| H | 1. 96895700  | -1. 64905400 | -2. 09024500 |
| H | 5. 11037800  | -4. 57095700 | -2. 29981100 |
| H | 5. 82204300  | -4. 01536900 | 0. 03322900  |
| H | 4. 59811200  | -2. 82578400 | 2. 41358000  |
| H | 3. 63337100  | -0. 16113400 | 2. 43084200  |
| H | 5. 45229300  | -1. 44999300 | 1. 72105700  |
| H | 2. 79078000  | 0. 16127900  | 0. 28699000  |
| N | 1. 14640100  | -1. 02125500 | 0. 76966600  |
| O | 2. 46709500  | -1. 67312200 | 2. 99513200  |
| C | 0. 10715400  | -0. 53403300 | 0. 01284100  |
| C | 0. 63319600  | -1. 99892200 | 1. 58274000  |
| N | -0. 97019900 | -1. 22881500 | 0. 44578000  |
| N | -0. 63904800 | -2. 14382700 | 1. 42762000  |
| C | 1. 58196900  | -2. 66949200 | 2. 51994900  |
| H | 2. 11832100  | -3. 48470800 | 2. 01281500  |
| H | 1. 04482900  | -3. 08186200 | 3. 37462800  |
| C | -2. 34906000 | -1. 09317100 | 0. 07589700  |
| C | -2. 99694700 | -2. 21428200 | -0. 45444300 |
| C | -2. 99888700 | 0. 12357600  | 0. 28913200  |
| C | -4. 34862100 | -2. 08992800 | -0. 76407500 |
| C | -4. 35282600 | 0. 19530600  | -0. 03764000 |
| C | -5. 04229600 | -0. 89534300 | -0. 56253400 |
| H | -4. 87049600 | -2. 94665400 | -1. 18497000 |
| H | -4. 87676300 | 1. 13502400  | 0. 11783400  |
| C | -6. 50074500 | -0. 79390200 | -0. 92496200 |
| C | 1. 33595200  | 2. 25298300  | 0. 04726400  |
| C | 1. 20805800  | 1. 43160600  | -1. 00233700 |
| H | 0. 62583500  | 2. 05735700  | 0. 85269800  |
| C | 2. 31766700  | 3. 31198200  | 0. 34018000  |
| C | 2. 71666600  | 3. 46892100  | 1. 67541500  |
| C | 2. 84279100  | 4. 18238000  | -0. 62403200 |

|    |             |             |             |
|----|-------------|-------------|-------------|
| C  | 3.64640500  | 4.43690000  | 2.03518200  |
| H  | 2.28968900  | 2.81736400  | 2.43425300  |
| C  | 3.76673900  | 5.15613200  | -0.26028100 |
| H  | 2.51652900  | 4.10586700  | -1.65404000 |
| C  | 4.17809300  | 5.28254800  | 1.06434100  |
| H  | 3.94887100  | 4.53718600  | 3.07286800  |
| H  | 4.16016200  | 5.82802900  | -1.01651300 |
| H  | 4.89961600  | 6.04497000  | 1.34083300  |
| Br | 2.39669600  | 1.50650300  | -2.49910400 |
| C  | 0.19111400  | 0.35363200  | -1.10861400 |
| H  | 0.06070200  | -0.18839400 | -2.12931100 |
| O  | -0.98772100 | 0.63996900  | -1.86310600 |
| N  | 3.10895200  | -3.48509600 | -3.65318200 |
| O  | 2.14599000  | -2.90490700 | -4.11995500 |
| O  | 3.75743100  | -4.33375100 | -4.23946700 |
| H  | -7.08330200 | -1.58482100 | -0.44294200 |
| H  | -6.64230100 | -0.89694200 | -2.00556500 |
| H  | -6.91893100 | 0.16863200  | -0.62203700 |
| C  | -2.26639500 | 1.32609400  | 0.81445200  |
| H  | -1.62425200 | 1.06918800  | 1.66421700  |
| H  | -1.65332800 | 1.74018300  | 0.00564300  |
| H  | -2.97212000 | 2.09174300  | 1.14390300  |
| C  | -2.26661600 | -3.50779700 | -0.69955700 |
| H  | -1.29859300 | -3.33469400 | -1.18078700 |
| H  | -2.07447700 | -4.04040300 | 0.23633800  |
| H  | -2.85742400 | -4.15629600 | -1.34961500 |

**re-TS2<sup>W</sup>**

|   |            |             |             |
|---|------------|-------------|-------------|
| C | 3.67719700 | -4.31745900 | 0.59175000  |
| C | 3.02918100 | -3.18795400 | 0.09179700  |
| C | 2.55932300 | -3.13824500 | -1.21344400 |
| C | 2.75860600 | -4.27197100 | -1.98993400 |
| C | 3.40769200 | -5.41317500 | -1.52683800 |
| C | 3.87573600 | -5.43408000 | -0.21819900 |
| C | 4.07417100 | -4.11491700 | 2.02985200  |
| C | 3.32023600 | -2.84406800 | 2.48484200  |
| C | 2.90256900 | -2.11651000 | 1.15567300  |
| H | 2.07344500 | -2.25423800 | -1.61528400 |
| H | 3.52777800 | -6.26225900 | -2.18841800 |
| H | 4.37606500 | -6.31705000 | 0.16649300  |
| H | 3.81839800 | -4.96112200 | 2.67445900  |
| H | 3.95566100 | -2.18860300 | 3.08026500  |
| H | 5.15540800 | -3.95985600 | 2.10806400  |
| H | 3.54810000 | -1.24553800 | 0.96634300  |

|    |             |             |             |
|----|-------------|-------------|-------------|
| N  | 1.51691200  | -1.65382300 | 1.25111200  |
| O  | 2.22772700  | -3.14658300 | 3.34272100  |
| C  | 0.89859800  | -0.58651500 | 0.69615200  |
| C  | 0.56683400  | -2.40044600 | 1.88775700  |
| N  | -0.39928200 | -0.76205100 | 0.99170500  |
| N  | -0.61289900 | -1.87644600 | 1.76098400  |
| C  | 1.04524900  | -3.56554400 | 2.68965900  |
| H  | 1.21349000  | -4.44272100 | 2.04933000  |
| H  | 0.30940300  | -3.82157800 | 3.45291300  |
| C  | -1.53346600 | -0.04215200 | 0.47917000  |
| C  | -1.77949700 | -0.09838200 | -0.89866200 |
| C  | -2.35770800 | 0.63624800  | 1.37763100  |
| C  | -2.87100400 | 0.62091900  | -1.37685400 |
| C  | -3.44516300 | 1.33058100  | 0.84587200  |
| C  | -3.70675900 | 1.34546300  | -0.52342700 |
| H  | -3.07772000 | 0.61208900  | -2.44425100 |
| H  | -4.09532100 | 1.88051900  | 1.52173200  |
| C  | -4.84486100 | 2.14954100  | -1.09138400 |
| C  | 0.62255300  | 2.29060300  | -1.46957000 |
| C  | 0.83786500  | 1.72975700  | -0.27738400 |
| H  | 1.05462500  | 1.73290300  | -2.30019800 |
| C  | -0.10320500 | 3.52955700  | -1.79766600 |
| C  | -1.27716200 | 3.89654300  | -1.12476300 |
| C  | 0.34114400  | 4.33276200  | -2.85575300 |
| C  | -1.96039000 | 5.05558400  | -1.47643800 |
| H  | -1.65529800 | 3.26547900  | -0.32781400 |
| C  | -0.34271800 | 5.49295800  | -3.20488200 |
| H  | 1.23681200  | 4.04564300  | -3.39995700 |
| C  | -1.49455400 | 5.86063000  | -2.51336200 |
| H  | -2.86497800 | 5.32623600  | -0.93986000 |
| H  | 0.02221300  | 6.10937800  | -4.02059300 |
| H  | -2.03053000 | 6.76449900  | -2.78548000 |
| Br | 0.37487700  | 2.58421800  | 1.36609900  |
| C  | 1.61424500  | 0.48404900  | -0.03227900 |
| H  | 3.20273300  | 0.12832800  | -0.90632300 |
| O  | 2.24140200  | -0.04555300 | -1.17791700 |
| N  | 2.24079500  | -4.27059500 | -3.36571000 |
| O  | 1.58510600  | -3.30849400 | -3.72342500 |
| O  | 2.49095600  | -5.23552700 | -4.06706700 |
| H  | -4.45854100 | 2.99133300  | -1.67641800 |
| H  | -5.48638900 | 2.54934200  | -0.30299500 |
| H  | -5.46183500 | 1.54333500  | -1.76093600 |
| C  | -2.09770300 | 0.61390200  | 2.85832200  |
| H  | -2.47164600 | -0.31430600 | 3.30169600  |

|   |             |             |             |
|---|-------------|-------------|-------------|
| H | -1.02922500 | 0.67973200  | 3.07661500  |
| H | -2.59951300 | 1.45302400  | 3.34497800  |
| C | -0.92157500 | -0.91749400 | -1.82640800 |
| H | 0.07769700  | -0.48914500 | -1.95660000 |
| H | -0.80232300 | -1.93876600 | -1.44799100 |
| H | -1.38734600 | -0.98167800 | -2.81139200 |
| O | 4.06256300  | 0.51313500  | 0.43420300  |
| H | 4.53555200  | 1.35126900  | 0.42936900  |
| H | 2.69123700  | 0.73070900  | 0.58029000  |

**re-M2**

|   |             |             |             |
|---|-------------|-------------|-------------|
| C | 4.03049600  | -3.63168700 | -3.85967800 |
| C | 3.46220300  | -2.35794400 | -3.83679800 |
| C | 3.90292200  | -1.35716600 | -4.69497200 |
| C | 4.91507000  | -1.69178100 | -5.58360500 |
| C | 5.48774800  | -2.95963600 | -5.64660800 |
| C | 5.04104800  | -3.94004200 | -4.76991200 |
| C | 3.43957800  | -4.51834400 | -2.79697600 |
| C | 2.33724700  | -3.67414900 | -2.10864900 |
| C | 2.40802600  | -2.23801500 | -2.75774400 |
| H | 3.49123700  | -0.35462100 | -4.67891300 |
| H | 6.27408800  | -3.15331400 | -6.36568900 |
| H | 5.48373900  | -4.93081300 | -4.79230000 |
| H | 3.01487100  | -5.44100400 | -3.20732200 |
| H | 2.52714500  | -3.58379300 | -1.03868500 |
| H | 4.20352200  | -4.81954900 | -2.07393400 |
| H | 2.71555700  | -1.51857000 | -2.00015600 |
| N | 1.09434200  | -1.84270900 | -3.26228800 |
| O | 1.05955400  | -4.27617300 | -2.18501900 |
| C | 0.68945500  | -0.60933400 | -3.75750700 |
| C | 0.22905400  | -2.78025800 | -3.78996500 |
| N | -0.42169700 | -0.90321100 | -4.51564900 |
| N | -0.70597900 | -2.26399000 | -4.50524100 |
| C | 0.48892100  | -4.21505900 | -3.47460200 |
| H | 1.15417100  | -4.65581100 | -4.23248500 |
| H | -0.44438600 | -4.77932800 | -3.46397600 |
| C | -1.47295700 | 0.02394300  | -4.80086800 |
| C | -1.64583900 | 0.46658100  | -6.11490200 |
| C | -2.29248600 | 0.45202400  | -3.75106000 |
| C | -2.68226900 | 1.36248900  | -6.36942300 |
| C | -3.31188000 | 1.35662400  | -4.05069700 |
| C | -3.52063000 | 1.81951300  | -5.35005700 |
| H | -2.83604100 | 1.71716000  | -7.38606300 |
| H | -3.96385600 | 1.69887300  | -3.25024400 |



|    |             |             |             |
|----|-------------|-------------|-------------|
| C  | -4.61124200 | 2.81585900  | -5.64554200 |
| C  | 3.28746600  | 1.77403000  | -2.80942500 |
| C  | 2.19258800  | 1.02199600  | -2.59373500 |
| H  | 3.49881000  | 1.91702800  | -3.87043200 |
| C  | 4.24772300  | 2.40509900  | -1.89730900 |
| C  | 5.57332300  | 2.52955900  | -2.34231600 |
| C  | 3.91687000  | 2.92543400  | -0.63802400 |
| C  | 6.54580300  | 3.11476900  | -1.54156400 |
| H  | 5.83470300  | 2.15118900  | -3.32756000 |
| C  | 4.89103000  | 3.51583300  | 0.15931600  |
| H  | 2.89201200  | 2.88011700  | -0.29013700 |
| C  | 6.20887700  | 3.60692900  | -0.28253600 |
| H  | 7.56657700  | 3.19145300  | -1.90293200 |
| H  | 4.61442900  | 3.91698200  | 1.12960400  |
| H  | 6.96488000  | 4.06828500  | 0.34505500  |
| Br | 1.67969100  | 0.48731800  | -0.79751300 |
| C  | 1.25926800  | 0.63218800  | -3.62294300 |
| O  | 1.00012900  | 1.54503900  | -4.64133200 |
| N  | 5.42777700  | -0.64595400 | -6.47934600 |
| O  | 4.99327700  | 0.48399000  | -6.34015300 |
| O  | 6.26318900  | -0.96653900 | -7.30641400 |
| H  | -5.40709400 | 2.76632400  | -4.89839000 |
| H  | -5.05394800 | 2.64099700  | -6.62962800 |
| H  | -4.21709100 | 3.83791500  | -5.64142300 |
| C  | -2.08516200 | -0.06218600 | -2.35119300 |
| H  | -2.84931600 | 0.33334600  | -1.67874900 |
| H  | -2.14411100 | -1.15541700 | -2.32680600 |
| H  | -1.10362800 | 0.22073300  | -1.95429200 |
| C  | -0.70864700 | 0.00134800  | -7.19299500 |
| H  | 0.30444700  | 0.35623000  | -6.97767400 |
| H  | -0.67197500 | -1.09107500 | -7.24057700 |
| H  | -1.01479800 | 0.38303400  | -8.16919800 |
| H  | 0.43328900  | 2.24982700  | -4.29751400 |

**si-M02**

|   |            |             |             |
|---|------------|-------------|-------------|
| C | 2.11956400 | -4.37890200 | -0.92561600 |
| C | 1.76298500 | -3.03259000 | -1.00418400 |
| C | 1.95129100 | -2.28909000 | -2.16502000 |
| C | 2.49226200 | -2.97722500 | -3.24505300 |
| C | 2.84028200 | -4.32534500 | -3.20825200 |
| C | 2.65928300 | -5.03468400 | -2.02945700 |
| C | 1.86611700 | -4.94001600 | 0.44655500  |
| C | 1.09495700 | -3.83932800 | 1.20943300  |
| C | 1.23610000 | -2.54023800 | 0.32661600  |

|    |             |             |             |
|----|-------------|-------------|-------------|
| H  | 1.67267100  | -1.23696500 | -2.24681000 |
| H  | 3.25126600  | -4.79104500 | -4.09547400 |
| H  | 2.93609800  | -6.08262300 | -1.97344000 |
| H  | 1.28182500  | -5.86566100 | 0.43212000  |
| H  | 1.52774500  | -3.65809700 | 2.19360800  |
| H  | 2.81134700  | -5.16419800 | 0.95104100  |
| H  | 1.91769600  | -1.81926800 | 0.77286200  |
| N  | -0.06710400 | -1.86448000 | 0.20270300  |
| O  | -0.24544900 | -4.21679700 | 1.48099100  |
| C  | -0.41273700 | -0.56573400 | 0.13138200  |
| C  | -1.23012200 | -2.59021800 | 0.16120900  |
| N  | -1.74310500 | -0.56093100 | 0.05558600  |
| N  | -2.27073500 | -1.81757500 | 0.08218500  |
| C  | -1.12699700 | -4.06119400 | 0.38507000  |
| H  | -0.76798700 | -4.58042400 | -0.51408300 |
| H  | -2.09885700 | -4.46659100 | 0.66781100  |
| C  | -2.59027500 | 0.60274000  | 0.07337500  |
| C  | -2.83024700 | 1.27820400  | -1.12418000 |
| C  | -3.11181500 | 0.99981500  | 1.30953900  |
| C  | -3.58909600 | 2.44575800  | -1.04250300 |
| C  | -3.85452700 | 2.17591100  | 1.33296300  |
| C  | -4.08715300 | 2.91654600  | 0.17197200  |
| H  | -3.79117800 | 3.00100600  | -1.95504700 |
| H  | -4.25547000 | 2.52530700  | 2.28107700  |
| C  | -4.83782500 | 4.21901200  | 0.23992800  |
| C  | 0.40014400  | 1.18100200  | 2.54715700  |
| C  | 0.19381300  | 1.56096500  | 1.28455500  |
| H  | 0.77197200  | 0.15758200  | 2.63923000  |
| C  | 0.17382300  | 1.87350300  | 3.82607000  |
| C  | -0.17301800 | 1.09196200  | 4.93815200  |
| C  | 0.31195800  | 3.25723900  | 3.99707200  |
| C  | -0.41871600 | 1.67633400  | 6.17476700  |
| H  | -0.25723000 | 0.01393800  | 4.82298900  |
| C  | 0.07550000  | 3.83864900  | 5.23822200  |
| H  | 0.61833100  | 3.87618500  | 3.16324600  |
| C  | -0.29821600 | 3.05555800  | 6.32742400  |
| H  | -0.69590700 | 1.05529000  | 7.02068100  |
| H  | 0.19346400  | 4.91128000  | 5.35603800  |
| H  | -0.48228200 | 3.51643500  | 7.29273000  |
| Br | -0.47287100 | 3.25541600  | 0.77145700  |
| C  | 0.51186700  | 0.64169200  | 0.09894000  |
| H  | 0.24939100  | 1.16617000  | -0.83131900 |
| O  | 1.80992000  | 0.20143100  | 0.08473500  |
| N  | 2.73278800  | -2.25048500 | -4.50028700 |

|   |              |              |              |
|---|--------------|--------------|--------------|
| O | 2. 74807800  | -1. 03661900 | -4. 45750800 |
| O | 2. 90942000  | -2. 91293900 | -5. 51047700 |
| H | -5. 31983700 | 4. 45334900  | -0. 71205500 |
| H | -4. 14989200 | 5. 03881000  | 0. 47460200  |
| H | -5. 60307400 | 4. 19859600  | 1. 01992700  |
| C | -2. 90504500 | 0. 17803500  | 2. 55195100  |
| H | -3. 12876400 | 0. 76783900  | 3. 44285800  |
| H | -3. 55968100 | -0. 70010200 | 2. 54700400  |
| H | -1. 87443100 | -0. 17942200 | 2. 63516700  |
| C | -2. 30498600 | 0. 77010900  | -2. 43814900 |
| H | -1. 23833700 | 0. 98460000  | -2. 57520500 |
| H | -2. 43082800 | -0. 31428800 | -2. 51897500 |
| H | -2. 84880500 | 1. 23582400  | -3. 26266500 |
| C | 1. 98145100  | 1. 25037100  | -2. 83437700 |
| O | 0. 88670700  | 0. 65329400  | -2. 83243400 |
| O | 2. 77029700  | 1. 32934700  | -1. 83194300 |
| H | 2. 29545600  | 0. 69551900  | -0. 78230700 |
| C | 2. 44802600  | 1. 96948700  | -4. 08559100 |
| H | 2. 43462300  | 3. 04883800  | -3. 90529800 |
| H | 3. 47819400  | 1. 68562100  | -4. 30990700 |
| H | 1. 80338400  | 1. 73060900  | -4. 93096400 |

**si-TS2**

|   |              |              |              |
|---|--------------|--------------|--------------|
| C | 3. 64983200  | -5. 00446600 | -4. 79956900 |
| C | 3. 43519900  | -3. 65539800 | -4. 51773400 |
| C | 3. 79317300  | -2. 66108600 | -5. 42153500 |
| C | 4. 34213900  | -3. 08543300 | -6. 62488600 |
| C | 4. 54770800  | -4. 42474000 | -6. 94623400 |
| C | 4. 20350300  | -5. 39679900 | -6. 01704800 |
| C | 3. 23487900  | -5. 88199200 | -3. 65151600 |
| C | 2. 57758800  | -4. 93789800 | -2. 61589400 |
| C | 2. 83265500  | -3. 47005500 | -3. 14109600 |
| H | 3. 65153300  | -1. 60241300 | -5. 22523900 |
| H | 4. 97650500  | -4. 68151100 | -7. 90680300 |
| H | 4. 36740100  | -6. 44624300 | -6. 23951500 |
| H | 2. 52948600  | -6. 66508200 | -3. 94874500 |
| H | 3. 04327100  | -5. 04489100 | -1. 63618200 |
| H | 4. 10303100  | -6. 38585500 | -3. 21599100 |
| H | 3. 51519200  | -2. 93553100 | -2. 48626900 |
| N | 1. 58184800  | -2. 69694600 | -3. 17271800 |
| O | 1. 21598000  | -5. 25514200 | -2. 39173000 |
| C | 1. 33412900  | -1. 36261600 | -3. 03084200 |
| C | 0. 37012200  | -3. 31808000 | -3. 35612700 |
| N | -0. 00902000 | -1. 26317800 | -3. 11923000 |

|    |             |             |             |
|----|-------------|-------------|-------------|
| N  | -0.61246700 | -2.48091100 | -3.31559000 |
| C  | 0.35616900  | -4.80668100 | -3.42107900 |
| H  | 0.68006300  | -5.16463600 | -4.40884400 |
| H  | -0.64727200 | -5.18197400 | -3.21971200 |
| C  | -0.82296900 | -0.08143000 | -3.05783400 |
| C  | -1.13373700 | 0.57904400  | -4.24708800 |
| C  | -1.28709000 | 0.33850200  | -1.80655700 |
| C  | -1.92218000 | 1.72575300  | -4.15295500 |
| C  | -2.04194800 | 1.50601200  | -1.76282100 |
| C  | -2.36296600 | 2.21351200  | -2.92437100 |
| H  | -2.17466700 | 2.26287000  | -5.06398900 |
| H  | -2.39670700 | 1.86699700  | -0.80064600 |
| C  | -3.14526900 | 3.49641800  | -2.84049500 |
| C  | 2.17485900  | 0.97243500  | -0.85013700 |
| C  | 1.97391900  | 0.92209300  | -2.17058000 |
| H  | 2.50846300  | 0.02479100  | -0.42437200 |
| C  | 1.99295900  | 2.06166900  | 0.12425800  |
| C  | 1.54250500  | 1.71957200  | 1.40749300  |
| C  | 2.28712900  | 3.40467700  | -0.14527800 |
| C  | 1.34813000  | 2.69242500  | 2.38106600  |
| H  | 1.33966400  | 0.67637900  | 1.63698600  |
| C  | 2.10169700  | 4.37541100  | 0.83343600  |
| H  | 2.67187300  | 3.68462300  | -1.11805500 |
| C  | 1.62445400  | 4.02723300  | 2.09475100  |
| H  | 0.98963900  | 2.40730600  | 3.36519800  |
| H  | 2.34112300  | 5.41040600  | 0.61032200  |
| H  | 1.48055700  | 4.78980200  | 2.85363900  |
| Br | 1.39342700  | 2.44491900  | -3.16188400 |
| C  | 2.31062600  | -0.29711900 | -2.99060300 |
| H  | 2.41944200  | 0.09580800  | -4.29729600 |
| O  | 3.58908000  | -0.80592700 | -2.68334300 |
| N  | 4.73956800  | -2.07091400 | -7.61186300 |
| O  | 4.73555800  | -0.90619800 | -7.26030000 |
| O  | 5.05256700  | -2.45663200 | -8.72535200 |
| H  | -3.64854600 | 3.71982600  | -3.78403900 |
| H  | -2.47653200 | 4.33361600  | -2.61316200 |
| H  | -3.89831800 | 3.45407100  | -2.04939300 |
| C  | -0.99342900 | -0.45669500 | -0.56507500 |
| H  | -1.45039100 | 0.01238000  | 0.30822100  |
| H  | -1.38139100 | -1.47689200 | -0.65342700 |
| H  | 0.08403300  | -0.52747600 | -0.38788400 |
| C  | -0.58046300 | 0.12332300  | -5.56726400 |
| H  | 0.46117500  | 0.45161400  | -5.67140600 |
| H  | -0.60895700 | -0.96519600 | -5.66770100 |

|   |             |             |             |
|---|-------------|-------------|-------------|
| H | -1.15241200 | 0.55618700  | -6.39065700 |
| C | 3.91569800  | 1.05781500  | -5.32725300 |
| O | 2.74705100  | 0.50979400  | -5.42137900 |
| O | 4.70635100  | 0.84539000  | -4.39717800 |
| H | 4.19592700  | -0.25616500 | -3.25051300 |
| C | 4.25813700  | 2.03602800  | -6.42137100 |
| H | 3.72491100  | 2.97001000  | -6.21584500 |
| H | 5.32999500  | 2.23000200  | -6.43980500 |
| H | 3.91991100  | 1.65649900  | -7.38605500 |

**si-TS2<sup>B</sup>**

|   |             |             |             |
|---|-------------|-------------|-------------|
| C | 4.37371100  | -3.49141600 | -3.82249800 |
| C | 3.65438100  | -2.30912400 | -3.98423000 |
| C | 3.80159100  | -1.48971600 | -5.10033000 |
| C | 4.71005200  | -1.93671200 | -6.05269400 |
| C | 5.44332700  | -3.11638700 | -5.93217300 |
| C | 5.27638000  | -3.90375600 | -4.80133700 |
| C | 4.03517000  | -4.16682300 | -2.52013200 |
| C | 2.83875700  | -3.37538600 | -1.93813400 |
| C | 2.73370900  | -2.06929000 | -2.80869600 |
| H | 3.22287400  | -0.55757300 | -5.21253100 |
| H | 6.12715800  | -3.39710100 | -6.72329000 |
| H | 5.83808000  | -4.82588400 | -4.68921900 |
| H | 3.76659200  | -5.22157800 | -2.64089600 |
| H | 3.00921700  | -3.09919400 | -0.89702800 |
| H | 4.88734200  | -4.12952100 | -1.83382200 |
| H | 3.04144600  | -1.19675900 | -2.23180800 |
| N | 1.35841000  | -1.85091200 | -3.24203400 |
| O | 1.64772300  | -4.14574600 | -1.90099600 |
| C | 0.72466700  | -0.69827800 | -3.57482600 |
| C | 0.51032600  | -2.88759600 | -3.50444900 |
| N | -0.46946700 | -1.10520400 | -4.01625900 |
| N | -0.62248700 | -2.46398700 | -3.97639500 |
| C | 0.97831800  | -4.25690900 | -3.14343300 |
| H | 1.63624000  | -4.66283400 | -3.92595200 |
| H | 0.13156700  | -4.93139600 | -3.01227700 |
| C | -1.52478100 | -0.24886200 | -4.48614900 |
| C | -1.51973700 | 0.12351300  | -5.83064500 |
| C | -2.44185700 | 0.23347500  | -3.55336300 |
| C | -2.48094600 | 1.04561500  | -6.23137600 |
| C | -3.38724800 | 1.14776900  | -4.00633400 |
| C | -3.39653800 | 1.58829000  | -5.32978700 |
| H | -2.46491800 | 1.40576400  | -7.25668800 |
| H | -4.08991400 | 1.57491000  | -3.29490300 |

|    |             |             |             |
|----|-------------|-------------|-------------|
| C  | -4.28348900 | 2.72185800  | -5.75832400 |
| C  | 3.33368500  | 1.64312900  | -2.63441600 |
| C  | 2.15421600  | 1.01260000  | -2.51933400 |
| H  | 3.61207500  | 1.75926700  | -3.68172300 |
| C  | 4.28157100  | 2.13315500  | -1.62997800 |
| C  | 5.64848800  | 2.13135800  | -1.95600600 |
| C  | 3.91000200  | 2.64221200  | -0.37526000 |
| C  | 6.60821300  | 2.57519300  | -1.05464900 |
| H  | 5.95092000  | 1.76788600  | -2.93470700 |
| C  | 4.87177400  | 3.08518500  | 0.52643300  |
| H  | 2.86010700  | 2.70418200  | -0.11549900 |
| C  | 6.22530200  | 3.04915700  | 0.19848600  |
| H  | 7.65796300  | 2.55608600  | -1.33358400 |
| H  | 4.55692500  | 3.47699800  | 1.48944800  |
| H  | 6.97112000  | 3.39997900  | 0.90529600  |
| Br | 1.41669400  | 0.50020700  | -0.81019800 |
| C  | 1.26334700  | 0.69116200  | -3.65766400 |
| H  | 0.30053200  | 1.62043200  | -3.61108800 |
| O  | 1.85025700  | 0.85379700  | -4.89392100 |
| N  | 4.91771400  | -1.12508400 | -7.26368900 |
| O  | 4.30570400  | -0.08112000 | -7.35904300 |
| O  | 5.69771700  | -1.55065800 | -8.10362300 |
| H  | -5.15682400 | 2.82577000  | -5.10850600 |
| H  | -4.62666100 | 2.60097400  | -6.78980700 |
| H  | -3.68048800 | 3.63546400  | -5.69855500 |
| C  | -2.33737800 | -0.15840400 | -2.10583500 |
| H  | -3.17909300 | 0.24070900  | -1.53605200 |
| H  | -2.31756400 | -1.24629200 | -1.98020200 |
| H  | -1.41377300 | 0.24167900  | -1.67075100 |
| C  | -0.47332400 | -0.40344200 | -6.77128700 |
| H  | 0.51496600  | -0.06765600 | -6.43521600 |
| H  | -0.48128300 | -1.49923800 | -6.79899200 |
| H  | -0.64477800 | -0.02859000 | -7.78208700 |
| H  | 0.98274300  | 1.94417500  | -5.49980000 |
| C  | -0.54047700 | 3.10711400  | -4.99350000 |
| O  | -1.35175600 | 3.96438000  | -5.34947500 |
| O  | -0.44797400 | 2.64959600  | -3.78118500 |
| O  | 0.31653700  | 2.61246100  | -5.90636400 |

**si-TS2<sup>D</sup>**

|   |            |             |             |
|---|------------|-------------|-------------|
| C | 3.93103400 | -4.82785000 | -5.13813100 |
| C | 3.65465800 | -3.46340200 | -5.08145300 |
| C | 3.84669300 | -2.63668800 | -6.18061200 |
| C | 4.29403300 | -3.24411800 | -7.34532500 |

|   |              |              |              |
|---|--------------|--------------|--------------|
| C | 4. 56804900  | -4. 60720600 | -7. 44115800 |
| C | 4. 39173000  | -5. 40743900 | -6. 32028500 |
| C | 3. 69986900  | -5. 48713200 | -3. 80619600 |
| C | 3. 03752600  | -4. 40907200 | -2. 91372800 |
| C | 3. 16859200  | -3. 05138200 | -3. 70990200 |
| H | 3. 69307000  | -1. 56570300 | -6. 10528300 |
| H | 4. 91899100  | -5. 01501300 | -8. 38095000 |
| H | 4. 61007700  | -6. 46942000 | -6. 36974700 |
| H | 3. 05620300  | -6. 37057500 | -3. 86898700 |
| H | 3. 55188000  | -4. 31099000 | -1. 95746500 |
| H | 4. 64935800  | -5. 81523600 | -3. 37143000 |
| H | 3. 85923000  | -2. 35508600 | -3. 23452200 |
| N | 1. 87015200  | -2. 36623900 | -3. 76929200 |
| O | 1. 71014500  | -4. 76033100 | -2. 55852300 |
| C | 1. 58353200  | -1. 04430800 | -3. 69885500 |
| C | 0. 68130400  | -3. 04573200 | -3. 72584000 |
| N | 0. 24171000  | -0. 99444100 | -3. 62235700 |
| N | -0. 32981500 | -2. 23965700 | -3. 62114400 |
| C | 0. 75375200  | -4. 52744900 | -3. 57696500 |
| H | 1. 03248500  | -5. 01762700 | -4. 52044400 |
| H | -0. 20511400 | -4. 92056200 | -3. 23893700 |
| C | -0. 55909900 | 0. 19145300  | -3. 52825900 |
| C | -0. 82960900 | 0. 90323000  | -4. 69758700 |
| C | -0. 98178500 | 0. 60544000  | -2. 26138400 |
| C | -1. 55173800 | 2. 09053500  | -4. 57076800 |
| C | -1. 70366100 | 1. 79364500  | -2. 18798200 |
| C | -1. 99528600 | 2. 54646800  | -3. 32871700 |
| H | -1. 77229600 | 2. 66954200  | -5. 46425100 |
| H | -2. 02722000 | 2. 15207500  | -1. 21370800 |
| C | -2. 77489100 | 3. 82969900  | -3. 21168800 |
| C | 1. 92988500  | 2. 10732100  | -2. 40755100 |
| C | 2. 48403600  | 0. 89844100  | -2. 53443600 |
| H | 1. 48365600  | 2. 45289000  | -3. 34086500 |
| C | 1. 74496000  | 3. 04001100  | -1. 28421600 |
| C | 2. 44172000  | 3. 00229300  | -0. 06745300 |
| C | 0. 80463900  | 4. 06664500  | -1. 47560300 |
| C | 2. 19141500  | 3. 95043800  | 0. 91919900  |
| H | 3. 19079800  | 2. 24261200  | 0. 10655700  |
| C | 0. 55092800  | 5. 00769800  | -0. 48598900 |
| H | 0. 26873900  | 4. 11627000  | -2. 42047400 |
| C | 1. 24406700  | 4. 95138800  | 0. 72091900  |
| H | 2. 74779400  | 3. 90697100  | 1. 85035600  |
| H | -0. 18159500 | 5. 79019600  | -0. 65931700 |
| H | 1. 05581200  | 5. 68747900  | 1. 49609700  |

|    |             |             |             |
|----|-------------|-------------|-------------|
| Br | 3.31897100  | -0.06806500 | -1.07114500 |
| C  | 2.52260500  | 0.05937300  | -3.74571200 |
| H  | 2.99292600  | 0.41263700  | -4.77430100 |
| O  | 3.85087300  | -0.34697900 | -4.16306100 |
| N  | 4.49353300  | -2.40802400 | -8.53786800 |
| O  | 4.21967000  | -1.22471900 | -8.45419100 |
| O  | 4.91585000  | -2.94841900 | -9.54587600 |
| H  | -2.54077300 | 4.34845100  | -2.27776000 |
| H  | -3.85235000 | 3.63342000  | -3.21465300 |
| H  | -2.55911300 | 4.50367100  | -4.04428700 |
| C  | -0.61051000 | -0.17144500 | -1.02907800 |
| H  | -0.90830800 | -1.22108800 | -1.11395700 |
| H  | 0.47347700  | -0.14754700 | -0.86489900 |
| H  | -1.09267200 | 0.25575900  | -0.14790700 |
| C  | -0.32431800 | 0.42045100  | -6.02916300 |
| H  | 0.76850400  | 0.49118800  | -6.06883000 |
| H  | -0.59672900 | -0.62529900 | -6.20239000 |
| H  | -0.73510700 | 1.02229000  | -6.84167400 |

***si-TS2<sup>W</sup>***

|   |            |             |             |
|---|------------|-------------|-------------|
| C | 6.46962200 | 1.05784000  | -5.11633500 |
| C | 5.15198500 | 1.15462900  | -4.66640100 |
| C | 4.41148400 | 2.32723900  | -4.80015000 |
| C | 5.06869600 | 3.38598700  | -5.41969600 |
| C | 6.38202100 | 3.32614500  | -5.87914600 |
| C | 7.09396300 | 2.14460000  | -5.72381500 |
| C | 7.04769800 | -0.30261200 | -4.83282100 |
| C | 5.84703600 | -1.17486900 | -4.40749800 |
| C | 4.71692700 | -0.15017100 | -4.02541000 |
| H | 3.38502500 | 2.45103000  | -4.42218800 |
| H | 6.82186800 | 4.19702200  | -6.34902400 |
| H | 8.11736100 | 2.07159700  | -6.07778500 |
| H | 7.55097600 | -0.75003000 | -5.69521500 |
| H | 6.08632700 | -1.80064300 | -3.54710200 |
| H | 7.78178600 | -0.24324900 | -4.02203100 |
| H | 4.61908100 | -0.05336800 | -2.94563800 |
| N | 3.41899300 | -0.61613900 | -4.52786100 |
| O | 5.47396800 | -2.09704700 | -5.42116900 |
| C | 2.17080400 | -0.57179700 | -4.01250600 |
| C | 3.33597100 | -1.25074900 | -5.74304300 |
| N | 1.40381400 | -1.16441300 | -4.93939400 |
| N | 2.11961800 | -1.60695900 | -6.01506100 |
| C | 4.62351800 | -1.57269200 | -6.42473700 |
| H | 5.05408300 | -0.68695100 | -6.91085200 |



|    |             |             |             |
|----|-------------|-------------|-------------|
| H  | 4.46746800  | -2.34865600 | -7.17441900 |
| C  | -0.01855900 | -1.32067300 | -4.84177900 |
| C  | -0.81274900 | -0.20060100 | -5.08852100 |
| C  | -0.51987900 | -2.54217100 | -4.37718900 |
| C  | -2.16538000 | -0.30287100 | -4.75684500 |
| C  | -1.87264100 | -2.58660400 | -4.05982900 |
| C  | -2.69885300 | -1.46855200 | -4.20885100 |
| H  | -2.81014000 | 0.55913100  | -4.91132100 |
| H  | -2.29020700 | -3.50809200 | -3.66018900 |
| C  | -4.13358000 | -1.53794600 | -3.76231200 |
| C  | -0.53744800 | -0.16641500 | -1.76182800 |
| C  | 0.69631000  | -0.62593600 | -1.99211100 |
| H  | -0.70700200 | 0.80539200  | -2.22647900 |
| C  | -1.71402500 | -0.68203400 | -1.04526500 |
| C  | -2.76400900 | 0.22709100  | -0.84046800 |
| C  | -1.89246200 | -2.00533400 | -0.61334300 |
| C  | -3.93620400 | -0.15295600 | -0.19856400 |
| H  | -2.64886300 | 1.24949100  | -1.19059300 |
| C  | -3.07016900 | -2.38639400 | 0.02241900  |
| H  | -1.11704800 | -2.74090300 | -0.77897200 |
| C  | -4.09288100 | -1.46524700 | 0.24038400  |
| H  | -4.72730100 | 0.57434800  | -0.04604000 |
| H  | -3.18769500 | -3.41465900 | 0.35060900  |
| H  | -5.00573000 | -1.76971100 | 0.74266300  |
| Br | 1.38585200  | -2.26413500 | -1.28058200 |
| C  | 1.70268500  | 0.12721600  | -2.79688100 |
| H  | 1.30381800  | 1.22548000  | -3.17359100 |
| O  | 2.79382500  | 0.59149600  | -2.03552700 |
| N  | 4.33703100  | 4.64968800  | -5.60681000 |
| O  | 3.14783900  | 4.65789900  | -5.35864200 |
| O  | 4.96853100  | 5.61617700  | -6.00563100 |
| H  | -4.18578500 | -1.84464200 | -2.71178200 |
| H  | -4.69500000 | -2.27227900 | -4.34911000 |
| H  | -4.63089500 | -0.57033000 | -3.85992200 |
| C  | 0.35598400  | -3.75892900 | -4.25316300 |
| H  | 0.48241200  | -4.23201400 | -5.23279500 |
| H  | 1.34894300  | -3.51664700 | -3.87039600 |
| H  | -0.09575200 | -4.48823300 | -3.57731700 |
| C  | -0.23162000 | 1.06625200  | -5.65934000 |
| H  | 0.32656400  | 1.65693200  | -4.91878700 |
| H  | 0.45750100  | 0.84045500  | -6.47960900 |
| H  | -1.03042000 | 1.69649900  | -6.05643600 |
| O  | 1.78436600  | 2.54515400  | -3.32451700 |
| H  | 2.69106100  | 1.57004000  | -2.21985300 |

|   |             |             |              |
|---|-------------|-------------|--------------|
| H | 1. 26827300 | 3. 28775300 | -2. 99699000 |
|---|-------------|-------------|--------------|

**si-M2**

|   |              |              |              |
|---|--------------|--------------|--------------|
| C | 3. 73495600  | -4. 18199100 | 0. 13317800  |
| C | 3. 12519300  | -2. 96129700 | -0. 15099200 |
| C | 2. 59306300  | -2. 69032300 | -1. 40442900 |
| C | 2. 69665900  | -3. 69362200 | -2. 35809700 |
| C | 3. 31196200  | -4. 91930600 | -2. 11312700 |
| C | 3. 83967400  | -5. 16461400 | -0. 85129100 |
| C | 4. 20528000  | -4. 23343000 | 1. 56236100  |
| C | 3. 64079200  | -2. 95627700 | 2. 23669000  |
| C | 3. 08983600  | -2. 05763200 | 1. 06386600  |
| H | 2. 12475500  | -1. 74170100 | -1. 64115700 |
| H | 3. 36052700  | -5. 65905500 | -2. 90244800 |
| H | 4. 31529300  | -6. 11655600 | -0. 63783500 |
| H | 3. 85622200  | -5. 12561900 | 2. 09219200  |
| H | 4. 42449800  | -2. 41546100 | 2. 76779600  |
| H | 5. 29879900  | -4. 24146800 | 1. 61084500  |
| H | 3. 72355200  | -1. 18260600 | 0. 92620200  |
| N | 1. 74260100  | -1. 59504300 | 1. 34901200  |
| O | 2. 68176000  | -3. 24830100 | 3. 23513400  |
| C | 1. 04529000  | -0. 49006000 | 0. 86975900  |
| C | 0. 85547700  | -2. 36289700 | 2. 06304500  |
| N | -0. 24417800 | -0. 70525800 | 1. 33108800  |
| N | -0. 32899500 | -1. 86564400 | 2. 09970500  |
| C | 1. 40380200  | -3. 58258100 | 2. 72524100  |
| H | 1. 46226500  | -4. 41983400 | 2. 01384200  |
| H | 0. 77113900  | -3. 87857800 | 3. 56213200  |
| C | -1. 44997700 | -0. 18247000 | 0. 77354900  |
| C | -1. 69914100 | -0. 30298600 | -0. 60164000 |
| C | -2. 36554600 | 0. 42636900  | 1. 64108600  |
| C | -2. 86462000 | 0. 27938800  | -1. 10145700 |
| C | -3. 52614000 | 0. 97023700  | 1. 09635900  |
| C | -3. 78284600 | 0. 92599800  | -0. 27447100 |
| H | -3. 06662900 | 0. 20781700  | -2. 16808500 |
| H | -4. 23942500 | 1. 45511400  | 1. 75876200  |
| C | -5. 01361300 | 1. 56832200  | -0. 85896400 |
| C | 0. 80978600  | 2. 30629100  | -1. 46045500 |
| C | 0. 80428900  | 1. 74547300  | -0. 23745400 |
| H | 1. 33756300  | 1. 71746600  | -2. 21157000 |
| C | 0. 23999300  | 3. 57320900  | -1. 93946500 |
| C | -0. 98569000 | 4. 08027600  | -1. 48244700 |
| C | 0. 90950300  | 4. 26535600  | -2. 95938800 |
| C | -1. 49740100 | 5. 26311800  | -2. 00481000 |

|    |             |             |             |
|----|-------------|-------------|-------------|
| H  | -1.53944900 | 3.53640500  | -0.72606100 |
| C  | 0.39819200  | 5.44944600  | -3.47690900 |
| H  | 1.84583900  | 3.86698600  | -3.34135700 |
| C  | -0.80718500 | 5.95645800  | -2.99656400 |
| H  | -2.44892700 | 5.63923600  | -1.64153700 |
| H  | 0.93820800  | 5.97428800  | -4.25888100 |
| H  | -1.21158900 | 6.87907300  | -3.40076800 |
| Br | 0.06661000  | 2.66916200  | 1.27417700  |
| C  | 1.51997000  | 0.52883100  | 0.09238200  |
| H  | 3.28028600  | 1.04809600  | -0.50132500 |
| O  | 2.70030200  | 0.28236100  | -0.61679000 |
| N  | 2.11948800  | -3.45022600 | -3.68740100 |
| O  | 1.53560400  | -2.39605700 | -3.86741100 |
| O  | 2.25261200  | -4.31811100 | -4.53236700 |
| H  | -4.75384200 | 2.48556500  | -1.39851300 |
| H  | -5.73403400 | 1.83077200  | -0.08074800 |
| H  | -5.50823700 | 0.90199500  | -1.57147400 |
| C  | -2.08209800 | 0.50285400  | 3.11490300  |
| H  | -2.14461500 | -0.48512000 | 3.58087100  |
| H  | -1.06907900 | 0.87886700  | 3.28691200  |
| H  | -2.79311900 | 1.16725400  | 3.61081500  |
| C  | -0.77678500 | -1.05173200 | -1.52754700 |
| H  | 0.04144500  | -0.41538400 | -1.88192000 |
| H  | -0.33467000 | -1.92172800 | -1.03170500 |
| H  | -1.32692300 | -1.40478300 | -2.40241700 |

**TS2'**

|   |            |             |             |
|---|------------|-------------|-------------|
| C | 4.23527900 | -3.41575300 | 0.26407000  |
| C | 3.25224900 | -2.52748300 | -0.16780600 |
| C | 2.76451200 | -2.54051100 | -1.46888900 |
| C | 3.32283100 | -3.48266400 | -2.32321700 |
| C | 4.32313400 | -4.37017200 | -1.93472600 |
| C | 4.78422900 | -4.33859800 | -0.62443800 |
| C | 4.54857100 | -3.21835800 | 1.72315700  |
| C | 3.49329000 | -2.21342400 | 2.24766500  |
| C | 2.80021500 | -1.63085200 | 0.96042300  |
| H | 1.97600200 | -1.87398100 | -1.81673800 |
| H | 4.71395300 | -5.07694500 | -2.65614600 |
| H | 5.55164200 | -5.03370300 | -0.29958900 |
| H | 4.50068300 | -4.14928400 | 2.29697400  |
| H | 3.95809500 | -1.39823600 | 2.80248600  |
| H | 5.55694700 | -2.81314300 | 1.85286200  |
| H | 3.08262500 | -0.58526200 | 0.81743000  |
| N | 1.34622600 | -1.66755900 | 1.09242200  |

|    |             |             |             |
|----|-------------|-------------|-------------|
| O  | 2.59275700  | -2.79355900 | 3.17577900  |
| C  | 0.40744200  | -0.91001500 | 0.50305300  |
| C  | 0.69890900  | -2.62757000 | 1.81858900  |
| N  | -0.75393500 | -1.43469300 | 0.88013200  |
| N  | -0.59079100 | -2.50318500 | 1.71572600  |
| C  | 1.55312100  | -3.56535200 | 2.60793000  |
| H  | 1.93992400  | -4.36624500 | 1.96133300  |
| H  | 0.98130600  | -4.01408500 | 3.42029300  |
| C  | -2.06908300 | -1.01443800 | 0.46499400  |
| C  | -2.64148400 | -1.67222400 | -0.62662600 |
| C  | -2.69364600 | 0.01784100  | 1.16570200  |
| C  | -3.90747600 | -1.25018200 | -1.02289100 |
| C  | -3.95906200 | 0.40219200  | 0.72424200  |
| C  | -4.57610500 | -0.21607400 | -0.36358600 |
| H  | -4.37886800 | -1.73453800 | -1.87401900 |
| H  | -4.47158000 | 1.20765600  | 1.24392200  |
| C  | -5.95301300 | 0.20538100  | -0.80301900 |
| C  | 0.66103000  | 2.61347700  | -0.93292900 |
| C  | 0.92413200  | 1.48759300  | -0.21897700 |
| H  | -0.17229400 | 2.50499200  | -1.62412400 |
| C  | 1.37070200  | 3.87555600  | -0.91297900 |
| C  | 2.63520100  | 4.04864700  | -0.31676800 |
| C  | 0.78922400  | 5.00104400  | -1.53055500 |
| C  | 3.26061300  | 5.29033100  | -0.31171000 |
| H  | 3.12800500  | 3.20046900  | 0.14638900  |
| C  | 1.42239600  | 6.23516700  | -1.53309100 |
| H  | -0.18124500 | 4.89004300  | -2.00772100 |
| C  | 2.66386600  | 6.39402100  | -0.91671700 |
| H  | 4.23444800  | 5.39314800  | 0.15937400  |
| H  | 0.94366100  | 7.08156100  | -2.01763500 |
| H  | 3.15991800  | 7.35934900  | -0.91536300 |
| Br | 1.52937800  | 1.59566600  | 1.74980400  |
| C  | 0.52411300  | 0.13689500  | -0.59931200 |
| H  | 1.91988400  | 0.57084000  | -0.48633400 |
| O  | 0.11524200  | -0.22808100 | -1.71300300 |
| N  | 2.81743800  | -3.56190600 | -3.70281900 |
| O  | 1.86137900  | -2.86836000 | -3.99256000 |
| O  | 3.38161300  | -4.32393900 | -4.46833500 |
| H  | -6.12352600 | 1.26650100  | -0.60628700 |
| H  | -6.72175300 | -0.35842800 | -0.26363400 |
| H  | -6.09951900 | 0.02505800  | -1.87056600 |
| C  | -2.02915200 | 0.69079500  | 2.33495900  |
| H  | -1.58609600 | -0.03995800 | 3.01891100  |
| H  | -1.22622600 | 1.36094000  | 2.01124300  |

|   |             |             |             |
|---|-------------|-------------|-------------|
| H | -2.75562000 | 1.28413100  | 2.89326400  |
| C | -1.90253200 | -2.76601600 | -1.34555800 |
| H | -0.99636900 | -2.35906200 | -1.80689700 |
| H | -1.61273700 | -3.56717500 | -0.65765900 |
| H | -2.52602600 | -3.19881400 | -2.12966700 |

**TS3**

|   |             |             |             |
|---|-------------|-------------|-------------|
| C | 2.07959800  | -4.28917500 | -2.20488000 |
| C | 1.84749500  | -2.94668000 | -1.90871800 |
| C | 2.14834100  | -1.94138400 | -2.81893100 |
| C | 2.68049100  | -2.34135600 | -4.03718000 |
| C | 2.92596600  | -3.67272600 | -4.36435800 |
| C | 2.62249300  | -4.65865300 | -3.43469300 |
| C | 1.68211800  | -5.18007600 | -1.06002500 |
| C | 0.99026600  | -4.25643300 | -0.02712600 |
| C | 1.24966200  | -2.78134500 | -0.52863800 |
| H | 1.99572300  | -0.89108500 | -2.59687000 |
| H | 3.34662000  | -3.91429200 | -5.33270500 |
| H | 2.80519700  | -5.70247000 | -3.66899100 |
| H | 1.00123700  | -5.98227800 | -1.36318300 |
| H | 1.43073600  | -4.37353300 | 0.96292000  |
| H | 2.56157700  | -5.65817900 | -0.61754000 |
| H | 1.93191600  | -2.26912000 | 0.14582600  |
| N | 0.00691100  | -2.00728700 | -0.56225200 |
| O | -0.37454100 | -4.58253800 | 0.15715200  |
| C | -0.22956200 | -0.67308200 | -0.38588900 |
| C | -1.20815800 | -2.61347900 | -0.76112700 |
| N | -1.57383200 | -0.56079600 | -0.48351300 |
| N | -2.18549700 | -1.76981600 | -0.70209200 |
| C | -1.22585800 | -4.10057800 | -0.86459400 |
| H | -0.89765500 | -4.43327700 | -1.86007500 |
| H | -2.23136500 | -4.47839500 | -0.67809500 |
| C | -2.35779800 | 0.63554800  | -0.42243600 |
| C | -2.59987900 | 1.32101100  | -1.61430300 |
| C | -2.82967100 | 1.06204100  | 0.82075800  |
| C | -3.35147100 | 2.49237000  | -1.53727800 |
| C | -3.58094700 | 2.23556500  | 0.84552300  |
| C | -3.85317200 | 2.95679200  | -0.31909800 |
| H | -3.55188500 | 3.05168500  | -2.44807300 |
| H | -3.94691800 | 2.60460100  | 1.80053400  |
| C | -4.67291700 | 4.21958000  | -0.26213300 |
| C | 0.06788400  | 2.75129600  | 0.48386800  |
| C | 0.48110900  | 1.49867300  | 0.47630100  |
| H | -0.24737000 | 3.08183800  | -0.51012800 |

|    |             |             |             |
|----|-------------|-------------|-------------|
| C  | -0.08941100 | 3.76841100  | 1.54377700  |
| C  | 0.84238400  | 3.95424000  | 2.57086300  |
| C  | -1.17300900 | 4.65104500  | 1.44560800  |
| C  | 0.65754600  | 4.96712600  | 3.50594000  |
| H  | 1.70293000  | 3.30180400  | 2.63368900  |
| C  | -1.35977200 | 5.65665700  | 2.38776000  |
| H  | -1.87572500 | 4.53628300  | 0.62487500  |
| C  | -0.44535600 | 5.81354700  | 3.42655100  |
| H  | 1.38886900  | 5.09993900  | 4.29689200  |
| H  | -2.21230900 | 6.32387400  | 2.30410600  |
| H  | -0.58377600 | 6.59954100  | 4.16234600  |
| Br | 1.41014900  | 0.71641800  | 2.62778900  |
| C  | 0.72934800  | 0.36108600  | -0.24420600 |
| H  | 2.42558900  | 0.09102500  | 0.53466800  |
| O  | 2.05366500  | -0.03532000 | -0.36528200 |
| N  | 3.00165200  | -1.30665300 | -5.03098200 |
| O  | 2.72307500  | -0.15344100 | -4.75745700 |
| O  | 3.52410700  | -1.66331800 | -6.07250700 |
| H  | -4.32400800 | 4.95305500  | -0.99399100 |
| H  | -4.62910200 | 4.67496600  | 0.73078800  |
| H  | -5.72494200 | 4.01034000  | -0.48347500 |
| C  | -2.47807300 | 0.31298900  | 2.07486800  |
| H  | -2.69343500 | -0.75542200 | 1.97246700  |
| H  | -1.40913300 | 0.41858500  | 2.30361100  |
| H  | -3.04300000 | 0.70011000  | 2.92487200  |
| C  | -2.03592800 | 0.81723900  | -2.91489800 |
| H  | -0.94001900 | 0.84068900  | -2.89824000 |
| H  | -2.34210800 | -0.21673100 | -3.10339000 |
| H  | -2.37456600 | 1.43376400  | -3.74948700 |

### TS3'

|   |            |             |             |
|---|------------|-------------|-------------|
| C | 1.56811900 | -3.38749200 | -2.72274400 |
| C | 1.65347800 | -2.53256300 | -1.62472800 |
| C | 2.07009700 | -1.21448400 | -1.76419900 |
| C | 2.33354900 | -0.77479700 | -3.05364900 |
| C | 2.25541700 | -1.59982800 | -4.17413200 |
| C | 1.88248300 | -2.92725600 | -4.00219900 |
| C | 1.12418400 | -4.76439700 | -2.30763700 |
| C | 0.79850700 | -4.65752800 | -0.79290300 |
| C | 1.15424500 | -3.18856200 | -0.35652000 |
| H | 2.21371100 | -0.57298500 | -0.90276900 |
| H | 2.48138100 | -1.19562000 | -5.15337100 |
| H | 1.82454400 | -3.58941600 | -4.86017500 |
| H | 0.25402400 | -5.11612600 | -2.87145900 |

|    |             |             |             |
|----|-------------|-------------|-------------|
| H  | 1.41941100  | -5.34674000 | -0.22021900 |
| H  | 1.92001800  | -5.49627600 | -2.47550700 |
| H  | 1.89200100  | -3.16649400 | 0.44294700  |
| N  | -0.04590300 | -2.49286500 | 0.12551600  |
| O  | -0.52648300 | -5.04335800 | -0.48111000 |
| C  | -0.11393400 | -1.19002200 | 0.61896200  |
| C  | -1.30533500 | -2.82015000 | -0.30940200 |
| N  | -1.44484200 | -0.85109200 | 0.46424500  |
| N  | -2.16579300 | -1.88054900 | -0.12150500 |
| C  | -1.50604400 | -4.14946000 | -0.96198000 |
| H  | -1.45479600 | -4.03819900 | -2.05496600 |
| H  | -2.48571900 | -4.55730400 | -0.70930400 |
| C  | -2.05965700 | 0.43471800  | 0.52878000  |
| C  | -1.96289200 | 1.28515100  | -0.58225100 |
| C  | -2.83430700 | 0.75279200  | 1.64732600  |
| C  | -2.66311700 | 2.48768900  | -0.54482600 |
| C  | -3.51033000 | 1.97384900  | 1.64464400  |
| C  | -3.44604100 | 2.84313100  | 0.55618400  |
| H  | -2.59149000 | 3.16772100  | -1.39072700 |
| H  | -4.11721400 | 2.24032000  | 2.50723000  |
| C  | -4.21824700 | 4.13587900  | 0.55401500  |
| C  | 1.01829000  | 1.75947300  | 0.89739400  |
| C  | 1.00869500  | 0.78217600  | 1.91525000  |
| H  | 1.68106800  | 1.46691600  | 0.07982300  |
| C  | 0.40457400  | 3.04817600  | 0.71045100  |
| C  | -0.39008100 | 3.71319000  | 1.66663300  |
| C  | 0.61851900  | 3.67271600  | -0.53962400 |
| C  | -0.94255600 | 4.95137100  | 1.37418400  |
| H  | -0.57608700 | 3.25729900  | 2.62901500  |
| C  | 0.05247400  | 4.90421300  | -0.82688400 |
| H  | 1.23280800  | 3.16697300  | -1.28134500 |
| C  | -0.73136300 | 5.54896700  | 0.13146700  |
| H  | -1.55076400 | 5.45359400  | 2.12023100  |
| H  | 0.22347700  | 5.36695600  | -1.79358900 |
| H  | -1.17116700 | 6.51766000  | -0.08662100 |
| Br | 0.15920000  | 0.99957400  | 3.62703000  |
| C  | 0.92975500  | -0.55416200 | 1.26483900  |
| H  | 2.19490200  | 0.14687100  | 1.99298000  |
| O  | 2.18461500  | -1.00847500 | 1.26933100  |
| N  | 2.68628200  | 0.63571500  | -3.24003800 |
| O  | 2.60853000  | 1.37496000  | -2.26867700 |
| O  | 3.02379900  | 1.00209700  | -4.35008500 |
| H  | -3.68913100 | 4.90982900  | -0.00850900 |
| H  | -4.38572900 | 4.50264600  | 1.57013900  |

|   |             |             |             |
|---|-------------|-------------|-------------|
| H | -5.20005800 | 4.00038900  | 0.08685400  |
| C | -3.00199600 | -0.23242800 | 2.77126200  |
| H | -3.75084300 | -0.98523600 | 2.50093200  |
| H | -2.06980700 | -0.75510300 | 2.99060400  |
| H | -3.33777000 | 0.27164400  | 3.68059600  |
| C | -1.11693500 | 0.90423000  | -1.76709200 |
| H | -0.05649300 | 0.83773800  | -1.49209000 |
| H | -1.41285800 | -0.07343000 | -2.16268900 |
| H | -1.21427400 | 1.64363500  | -2.56518600 |

**M3**

|   |             |             |             |
|---|-------------|-------------|-------------|
| C | 2.18888900  | -4.23901900 | -1.58113400 |
| C | 1.81119900  | -2.89802800 | -1.67631900 |
| C | 1.86682900  | -2.21160800 | -2.87884100 |
| C | 2.30850400  | -2.92560900 | -3.98670900 |
| C | 2.69399900  | -4.26148500 | -3.92726700 |
| C | 2.63516800  | -4.92576500 | -2.70692000 |
| C | 2.04740300  | -4.73297400 | -0.16434300 |
| C | 1.20761000  | -3.65683000 | 0.55775400  |
| C | 1.39808500  | -2.37262700 | -0.32117000 |
| H | 1.58394700  | -1.16940200 | -2.97647200 |
| H | 3.02771800  | -4.76012200 | -4.82901000 |
| H | 2.92754100  | -5.96881900 | -2.64146300 |
| H | 1.56213100  | -5.70977000 | -0.08878600 |
| H | 1.55273700  | -3.44122500 | 1.56944700  |
| H | 3.03420100  | -4.81816600 | 0.30408100  |
| H | 2.16973700  | -1.75051400 | 0.12421200  |
| N | 0.16306000  | -1.58850200 | -0.37565100 |
| O | -0.14527500 | -4.06377200 | 0.71043900  |
| C | -0.10112700 | -0.26939300 | -0.26045200 |
| C | -1.03973100 | -2.23866300 | -0.41724100 |
| N | -1.43799800 | -0.18172200 | -0.26327200 |
| N | -2.03245200 | -1.40595500 | -0.34854000 |
| C | -1.01917700 | -3.72906300 | -0.34792000 |
| H | -0.70855500 | -4.16972500 | -1.30499400 |
| H | -2.01303400 | -4.09822900 | -0.09287000 |
| C | -2.26945200 | 0.97825300  | -0.06530300 |
| C | -2.60588500 | 1.76169600  | -1.17296100 |
| C | -2.71074600 | 1.24093600  | 1.23148000  |
| C | -3.38790800 | 2.88675500  | -0.93824300 |
| C | -3.49672200 | 2.38169800  | 1.41104800  |
| C | -3.83434000 | 3.21417800  | 0.34795100  |
| H | -3.65641900 | 3.52533400  | -1.77685300 |
| H | -3.83380200 | 2.62829400  | 2.41447600  |



|    |             |             |             |
|----|-------------|-------------|-------------|
| C  | -4.66091300 | 4.45266000  | 0.56751600  |
| C  | 0.08698000  | 3.31916700  | -0.01109900 |
| C  | 0.48698000  | 2.08245600  | -0.14755100 |
| H  | 0.04766800  | 3.97893000  | -0.87769900 |
| C  | -0.41511300 | 3.84172900  | 1.27609300  |
| C  | -0.26469800 | 3.11559100  | 2.46591000  |
| C  | -1.12119500 | 5.04709500  | 1.28596600  |
| C  | -0.84431500 | 3.58624500  | 3.63723500  |
| H  | 0.29389400  | 2.17930300  | 2.47427300  |
| C  | -1.70187600 | 5.51215500  | 2.46210900  |
| H  | -1.23242900 | 5.60705500  | 0.36058700  |
| C  | -1.56980400 | 4.77871900  | 3.63847200  |
| H  | -0.72722600 | 3.01849400  | 4.55524100  |
| H  | -2.25789500 | 6.44469400  | 2.45860000  |
| H  | -2.02061600 | 5.13970300  | 4.55777700  |
| Br | 1.30325100  | -0.68362900 | 2.68838600  |
| C  | 0.87803400  | 0.82553400  | -0.14263800 |
| H  | 2.20196800  | 0.14685100  | 0.99756000  |
| O  | 2.17606100  | 0.45737900  | 0.03751300  |
| N  | 2.36489100  | -2.23493600 | -5.28243200 |
| O  | 1.98311800  | -1.07855400 | -5.32307500 |
| O  | 2.78608700  | -2.85727600 | -6.24064900 |
| H  | -4.16242300 | 5.33468100  | 0.15342500  |
| H  | -4.83556100 | 4.62968600  | 1.63091800  |
| H  | -5.63352100 | 4.36656500  | 0.07193600  |
| C  | -2.37684600 | 0.32745000  | 2.37773800  |
| H  | -2.93802100 | -0.60979000 | 2.28972900  |
| H  | -1.31355800 | 0.06349400  | 2.41841100  |
| H  | -2.64781100 | 0.79699000  | 3.32575500  |
| C  | -2.09464700 | 1.41930200  | -2.54478100 |
| H  | -1.01788200 | 1.61301600  | -2.62092900 |
| H  | -2.26023700 | 0.36356800  | -2.78059800 |
| H  | -2.59577100 | 2.02066200  | -3.30539100 |

#### M04

|   |            |             |             |
|---|------------|-------------|-------------|
| C | 4.93844100 | -1.15803200 | 0.40176300  |
| C | 3.71761700 | -0.48834800 | 0.47212900  |
| C | 3.57107200 | 0.81226100  | 0.01254300  |
| C | 4.69829800 | 1.41179000  | -0.53288300 |
| C | 5.93425100 | 0.77622100  | -0.61420700 |
| C | 6.05585200 | -0.52509600 | -0.13989100 |
| C | 4.82269100 | -2.54837100 | 0.96879000  |
| C | 3.30728100 | -2.78764300 | 1.17803100  |
| C | 2.64626000 | -1.36417600 | 1.08170900  |

|   |              |              |              |
|---|--------------|--------------|--------------|
| H | 2. 63150300  | 1. 35263500  | 0. 06807000  |
| H | 6. 77472500  | 1. 30126900  | -1. 05131400 |
| H | 7. 00995900  | -1. 03830900 | -0. 20193500 |
| H | 5. 23936100  | -3. 31833900 | 0. 31218000  |
| H | 3. 09724700  | -3. 22463500 | 2. 15408100  |
| H | 5. 35272700  | -2. 61728700 | 1. 92425500  |
| H | 2. 32025900  | -0. 98780500 | 2. 05255400  |
| N | 1. 46276100  | -1. 40922400 | 0. 21823100  |
| O | 2. 77579800  | -3. 72451600 | 0. 25575600  |
| C | 0. 36305800  | -0. 62819700 | 0. 18858500  |
| C | 1. 42397500  | -2. 20769500 | -0. 89080800 |
| N | -0. 28842300 | -0. 98572600 | -0. 92063400 |
| N | 0. 36297100  | -1. 97611500 | -1. 60187700 |
| C | 2. 51273200  | -3. 22064800 | -1. 03742200 |
| H | 3. 40459700  | -2. 77221600 | -1. 49773000 |
| H | 2. 17474500  | -4. 04933800 | -1. 66020000 |
| C | -1. 52627400 | -0. 46968900 | -1. 44878700 |
| C | -1. 43827800 | 0. 43663200  | -2. 51173400 |
| C | -2. 73202800 | -0. 91082400 | -0. 90952400 |
| C | -2. 63116100 | 0. 90336000  | -3. 04915100 |
| C | -3. 90215700 | -0. 41504700 | -1. 49297000 |
| C | -3. 87192900 | 0. 47992900  | -2. 55757900 |
| H | -2. 59512800 | 1. 61507400  | -3. 87065700 |
| H | -4. 85912600 | -0. 73752800 | -1. 09068300 |
| C | -5. 14625400 | 0. 98060400  | -3. 18249300 |
| C | -1. 41139000 | 2. 42281600  | 0. 37619200  |
| C | -0. 66473000 | 1. 43501000  | 0. 80521900  |
| H | -0. 94255400 | 3. 31235900  | -0. 04876900 |
| C | -2. 89109200 | 2. 39847000  | 0. 39586800  |
| C | -3. 59081700 | 1. 56046900  | 1. 27159900  |
| C | -3. 60582600 | 3. 21256600  | -0. 48788700 |
| C | -4. 97944300 | 1. 51573000  | 1. 23961200  |
| H | -3. 03979500 | 0. 95183400  | 1. 98503900  |
| C | -4. 99638100 | 3. 16840800  | -0. 51769000 |
| H | -3. 06440500 | 3. 87211900  | -1. 16167900 |
| C | -5. 68590800 | 2. 31429200  | 0. 34033700  |
| H | -5. 51129000 | 0. 86157700  | 1. 92374500  |
| H | -5. 54325500 | 3. 80199500  | -1. 20961700 |
| H | -6. 77098400 | 2. 28208400  | 0. 31933500  |
| C | 0. 01038800  | 0. 37137400  | 1. 22961500  |
| H | 0. 13988100  | -1. 38626700 | 2. 65715100  |
| O | 0. 44807100  | 0. 09476800  | 2. 44310200  |
| N | 4. 57289300  | 2. 77804900  | -1. 06048000 |
| O | 3. 46083200  | 3. 27527800  | -1. 07794000 |

|   |             |             |             |
|---|-------------|-------------|-------------|
| O | 5.58426500  | 3.32906500  | -1.45511300 |
| H | -5.06379200 | 2.03657800  | -3.45400200 |
| H | -5.99136600 | 0.86657200  | -2.49998000 |
| H | -5.37405100 | 0.42261100  | -4.09738800 |
| C | -2.79021600 | -1.81774500 | 0.28675200  |
| H | -1.94722300 | -2.51215400 | 0.33331500  |
| H | -2.78674900 | -1.21737500 | 1.20307200  |
| H | -3.71203400 | -2.40240500 | 0.28816100  |
| C | -0.10036500 | 0.91062400  | -3.00926000 |
| H | 0.45424400  | 1.41490900  | -2.20848900 |
| H | 0.51294900  | 0.07753500  | -3.36642500 |
| H | -0.22403100 | 1.62072800  | -3.82880000 |
| H | -1.05449000 | -0.22268300 | 3.32674700  |
| C | -1.55549200 | -2.07709300 | 3.22419200  |
| O | -2.36715200 | -2.95190900 | 3.37511400  |
| O | -1.83179900 | -0.79396800 | 3.53357600  |
| O | -0.33184400 | -2.28489500 | 2.73605400  |

**E-TS4**

|   |             |             |             |
|---|-------------|-------------|-------------|
| C | 4.94026900  | -0.64879100 | 0.16261700  |
| C | 3.63100200  | -0.38308800 | 0.56139100  |
| C | 3.13488300  | 0.91215600  | 0.60847900  |
| C | 3.99522900  | 1.92726200  | 0.21562000  |
| C | 5.30733200  | 1.69852000  | -0.18959900 |
| C | 5.78650200  | 0.39444800  | -0.21117500 |
| C | 5.24271900  | -2.12089700 | 0.21581500  |
| C | 3.90335200  | -2.81439500 | 0.57106600  |
| C | 2.87963600  | -1.65419600 | 0.88528200  |
| H | 2.13106900  | 1.15142000  | 0.94496800  |
| H | 5.92809900  | 2.53695400  | -0.48056800 |
| H | 6.80728100  | 0.19590100  | -0.52119200 |
| H | 5.63318700  | -2.50630000 | -0.73185000 |
| H | 4.00509000  | -3.43738800 | 1.45931200  |
| H | 5.99741300  | -2.33426800 | 0.97857700  |
| H | 2.52807500  | -1.68730300 | 1.91634500  |
| N | 1.68629400  | -1.77980500 | 0.03276000  |
| O | 3.46465400  | -3.70937700 | -0.43341100 |
| C | 0.45087700  | -1.27298000 | 0.19826200  |
| C | 1.70890500  | -2.38201000 | -1.19372100 |
| N | -0.21850500 | -1.59235000 | -0.90731300 |
| N | 0.54926800  | -2.29639400 | -1.78047200 |
| C | 2.96411800  | -3.08226800 | -1.59565900 |
| H | 3.68288900  | -2.37056600 | -2.02567800 |
| H | 2.74752700  | -3.85384700 | -2.33472300 |

|   |             |             |             |
|---|-------------|-------------|-------------|
| C | -1.62091800 | -1.35864700 | -1.16068800 |
| C | -1.97208800 | -0.31693500 | -2.01793200 |
| C | -2.54143200 | -2.14625600 | -0.46580700 |
| C | -3.33205000 | -0.04248100 | -2.14273900 |
| C | -3.88587700 | -1.81997900 | -0.61579500 |
| C | -4.29322400 | -0.76333300 | -1.43216800 |
| H | -3.64078700 | 0.78591800  | -2.77502800 |
| H | -4.61856400 | -2.36525400 | -0.02745800 |
| C | -5.74609700 | -0.37728500 | -1.49003900 |
| C | -0.81306200 | 1.63803300  | 0.52244300  |
| C | -1.05752400 | 0.48743800  | 1.17137100  |
| H | 0.20625900  | 1.92111700  | 0.23715500  |
| C | -1.81618700 | 2.64000100  | 0.12135300  |
| C | -3.19492200 | 2.38839200  | 0.18377400  |
| C | -1.37557400 | 3.86916000  | -0.38496200 |
| C | -4.10067400 | 3.35186000  | -0.24309600 |
| H | -3.55254100 | 1.43389200  | 0.55933500  |
| C | -2.28500700 | 4.83249900  | -0.81018900 |
| H | -0.30750700 | 4.07032500  | -0.43342000 |
| C | -3.65145900 | 4.57563400  | -0.74079200 |
| H | -5.16554800 | 3.14528000  | -0.18898600 |
| H | -1.92614400 | 5.78260400  | -1.19391900 |
| H | -4.36420900 | 5.32385900  | -1.07404800 |
| C | -0.02908000 | -0.48397500 | 1.41663000  |
| H | -1.68663600 | -0.95564600 | 3.36682700  |
| O | 0.45351000  | -0.83796700 | 2.48663100  |
| N | 3.48862300  | 3.30740500  | 0.21623000  |
| O | 2.30697200  | 3.47307900  | 0.46606500  |
| O | 4.27446600  | 4.19933300  | -0.04074900 |
| H | -5.91793400 | 0.42752200  | -2.20843400 |
| H | -6.07994300 | -0.03603600 | -0.50450800 |
| H | -6.37375400 | -1.22895500 | -1.76828700 |
| C | -2.09502100 | -3.27356900 | 0.42701300  |
| H | -1.39972100 | -3.93831900 | -0.09754700 |
| H | -1.60117700 | -2.90520500 | 1.33311200  |
| H | -2.95650300 | -3.85362400 | 0.75875500  |
| C | -0.93124300 | 0.49668900  | -2.73352500 |
| H | -0.19335000 | 0.89856800  | -2.02994500 |
| H | -0.39327100 | -0.10562500 | -3.47309000 |
| H | -1.39454700 | 1.34194800  | -3.24555400 |
| H | -2.29739200 | 0.13961100  | 1.68373400  |
| C | -3.41234900 | -1.37367800 | 2.60889600  |
| O | -4.30649800 | -2.19255200 | 2.53711700  |
| O | -3.40066200 | -0.18397800 | 2.09252100  |

|                        |             |             |             |
|------------------------|-------------|-------------|-------------|
| 0                      | -2.27548700 | -1.72049000 | 3.29609000  |
| <b>TS4<sup>a</sup></b> |             |             |             |
| C                      | 2.01798900  | -3.69782800 | -2.38908000 |
| C                      | 1.82935000  | -2.67962100 | -1.45488900 |
| C                      | 2.33967200  | -1.40427700 | -1.65537600 |
| C                      | 3.03735900  | -1.18673700 | -2.83435200 |
| C                      | 3.24854600  | -2.18039800 | -3.78681200 |
| C                      | 2.73530400  | -3.45137600 | -3.55928800 |
| C                      | 1.37902300  | -4.98274800 | -1.94061200 |
| C                      | 0.62957500  | -4.64509400 | -0.62742900 |
| C                      | 0.99155100  | -3.14706700 | -0.28642600 |
| H                      | 2.22539100  | -0.59691100 | -0.93845000 |
| H                      | 3.80551400  | -1.94552300 | -4.68570900 |
| H                      | 2.88812900  | -4.23696900 | -4.29164600 |
| H                      | 0.68827700  | -5.39208800 | -2.68492700 |
| H                      | 0.96989500  | -5.27758900 | 0.19173100  |
| H                      | 2.13637700  | -5.75101400 | -1.76087100 |
| H                      | 1.49944000  | -3.05542000 | 0.67364900  |
| N                      | -0.23574000 | -2.33381900 | -0.19484300 |
| O                      | -0.76223500 | -4.88774800 | -0.69948000 |
| C                      | -0.41143100 | -1.11116400 | 0.33506400  |
| C                      | -1.38911400 | -2.64687100 | -0.85615400 |
| N                      | -1.64182300 | -0.73662200 | -0.00675900 |
| N                      | -2.26847900 | -1.69226300 | -0.74297200 |
| C                      | -1.47214100 | -3.98394300 | -1.51760800 |
| H                      | -1.06339100 | -3.93317400 | -2.53662300 |
| H                      | -2.51007500 | -4.31421200 | -1.57169200 |
| C                      | -2.34124000 | 0.48420900  | 0.32223000  |
| C                      | -2.48758000 | 1.43223400  | -0.69289600 |
| C                      | -2.84839100 | 0.64094500  | 1.61294700  |
| C                      | -3.17809900 | 2.59748200  | -0.37286500 |
| C                      | -3.53108500 | 1.82771500  | 1.87832100  |
| C                      | -3.70636000 | 2.81058500  | 0.90217500  |
| H                      | -3.28937400 | 3.36611400  | -1.13356400 |
| H                      | -3.93944100 | 1.98345600  | 2.87340900  |
| C                      | -4.45098000 | 4.08102200  | 1.21067800  |
| C                      | 0.80580800  | 1.90292500  | -0.02985000 |
| C                      | 0.63427400  | 1.02897400  | 0.97310000  |
| H                      | 1.29099500  | 1.58185200  | -0.95677300 |
| C                      | 0.45215700  | 3.32343500  | 0.01349400  |
| C                      | -0.37301800 | 3.84515800  | 1.02010800  |
| C                      | 0.90509300  | 4.16734000  | -1.00784900 |
| C                      | -0.72537800 | 5.18712800  | 1.00828600  |

|   |             |             |             |
|---|-------------|-------------|-------------|
| H | -0.75691000 | 3.18556200  | 1.79421300  |
| C | 0.55277300  | 5.51280400  | -1.01728700 |
| H | 1.54284800  | 3.76158300  | -1.78946500 |
| C | -0.26173500 | 6.02332600  | -0.00970300 |
| H | -1.36710500 | 5.58471800  | 1.78847400  |
| H | 0.91229300  | 6.16198900  | -1.80880500 |
| H | -0.53895700 | 7.07276100  | -0.01674400 |
| C | 0.62329600  | -0.34647100 | 1.10585800  |
| H | 1.96149700  | -0.28042700 | 2.81627500  |
| O | 1.29082000  | -1.05022300 | 1.92459600  |
| N | 3.56995400  | 0.15959000  | -3.09012800 |
| O | 3.28720100  | 1.03938600  | -2.29210700 |
| O | 4.25393000  | 0.31892200  | -4.08068400 |
| H | -4.01154800 | 4.92992100  | 0.68041800  |
| H | -4.44314000 | 4.29779900  | 2.28135200  |
| H | -5.49664100 | 4.00191300  | 0.89490900  |
| C | -2.65862500 | -0.40842600 | 2.67459000  |
| H | -2.91408500 | -1.40633000 | 2.30502800  |
| H | -1.62187600 | -0.43657600 | 3.03011100  |
| H | -3.29300900 | -0.19444400 | 3.53602800  |
| C | -1.91647200 | 1.20412100  | -2.06472900 |
| H | -0.90339700 | 0.78879800  | -2.01565700 |
| H | -2.53313700 | 0.50018100  | -2.63340200 |
| H | -1.86885200 | 2.14333500  | -2.61845500 |
| H | 0.65657700  | 1.50075700  | 2.36939300  |
| C | 1.87495900  | 1.35518500  | 3.99784800  |
| O | 0.85994200  | 1.86866400  | 3.43226700  |
| O | 2.44202800  | 0.28611900  | 3.60919600  |
| C | 2.45177000  | 2.06294000  | 5.17510500  |
| H | 1.64754000  | 2.41263200  | 5.82365100  |
| H | 3.13780800  | 1.41378000  | 5.71522000  |
| H | 2.99008600  | 2.94213400  | 4.80733800  |

**TS4<sup>b</sup>**

|   |            |             |             |
|---|------------|-------------|-------------|
| C | 2.12522300 | -3.83305300 | -2.37625000 |
| C | 1.80086500 | -2.77607700 | -1.52794000 |
| C | 2.14552800 | -1.46754800 | -1.82739900 |
| C | 2.82377200 | -1.25278100 | -3.01671800 |
| C | 3.19456900 | -2.28521700 | -3.87393400 |
| C | 2.84215100 | -3.59095400 | -3.54798700 |
| C | 1.58402400 | -5.13528100 | -1.84818200 |
| C | 0.66031500 | -4.75534100 | -0.66369500 |
| C | 0.97098300 | -3.24255600 | -0.35328900 |
| H | 1.90564600 | -0.62965100 | -1.18045600 |

|   |             |             |             |
|---|-------------|-------------|-------------|
| H | 3.73252500  | -2.05386100 | -4.78571000 |
| H | 3.10647500  | -4.40573900 | -4.21375900 |
| H | 1.02564700  | -5.70162200 | -2.60006500 |
| H | 0.87535600  | -5.35679500 | 0.21857200  |
| H | 2.39641700  | -5.78106000 | -1.50156400 |
| H | 1.46208800  | -3.11429100 | 0.61228500  |
| N | -0.27695400 | -2.46027300 | -0.32326100 |
| O | -0.71091500 | -4.99494200 | -0.92375400 |
| C | -0.50293000 | -1.23456900 | 0.17912500  |
| C | -1.33257500 | -2.75481000 | -1.13842400 |
| N | -1.67126500 | -0.83866800 | -0.32731800 |
| N | -2.20608800 | -1.78697000 | -1.14025900 |
| C | -1.32094800 | -4.08896600 | -1.81655000 |
| H | -0.79036600 | -4.02681400 | -2.77742600 |
| H | -2.34072300 | -4.42803200 | -2.00245900 |
| C | -2.37087700 | 0.40648700  | -0.10318000 |
| C | -2.50210200 | 1.27052600  | -1.19497200 |
| C | -2.84538700 | 0.69700900  | 1.17911200  |
| C | -3.13743900 | 2.48862800  | -0.96369200 |
| C | -3.45619000 | 1.93774700  | 1.35290900  |
| C | -3.60929300 | 2.84318600  | 0.30049600  |
| H | -3.24403100 | 3.18844300  | -1.78839100 |
| H | -3.82627800 | 2.20037100  | 2.34096400  |
| C | -4.29202100 | 4.16484700  | 0.52161100  |
| C | 0.42534900  | 1.71163800  | 0.04062800  |
| C | 0.55246500  | 0.84032800  | 1.09432300  |
| H | 0.69233600  | 1.38030100  | -0.96929800 |
| C | 0.03200200  | 3.08408000  | 0.14993400  |
| C | -0.40732700 | 3.62771700  | 1.37454300  |
| C | -0.01672500 | 3.86533600  | -1.02150500 |
| C | -0.90020300 | 4.92032500  | 1.41392100  |
| H | -0.35137600 | 3.02883000  | 2.27876600  |
| C | -0.51069500 | 5.15854400  | -0.97478800 |
| H | 0.33740600  | 3.43902400  | -1.95725400 |
| C | -0.95556800 | 5.68096700  | 0.24181100  |
| H | -1.23757800 | 5.34597100  | 2.35283000  |
| H | -0.54561100 | 5.76390300  | -1.87383900 |
| H | -1.33955600 | 6.69580500  | 0.28127000  |
| C | 0.38076500  | -0.51231200 | 1.12067900  |
| H | 1.34063800  | -0.67333800 | 2.74671800  |
| O | 0.83757100  | -1.29566400 | 2.07411000  |
| N | 3.11915600  | 0.13575100  | -3.39727500 |
| O | 2.59532300  | 1.02115200  | -2.73803500 |
| O | 3.84816400  | 0.31959600  | -4.34985800 |

|   |             |             |             |
|---|-------------|-------------|-------------|
| H | -3.94931000 | 4.91103100  | -0.19901500 |
| H | -4.10539200 | 4.54390600  | 1.52934600  |
| H | -5.37582100 | 4.05918200  | 0.40323900  |
| C | -2.69258600 | -0.25334800 | 2.33638300  |
| H | -2.78239800 | -1.29787000 | 2.02564400  |
| H | -1.72479100 | -0.12609600 | 2.83565900  |
| H | -3.46659100 | -0.06163000 | 3.08152300  |
| C | -1.95427200 | 0.92492200  | -2.55339600 |
| H | -0.92137600 | 0.55848100  | -2.49580800 |
| H | -2.55038000 | 0.14324300  | -3.03360500 |
| H | -1.96361900 | 1.80376000  | -3.20046000 |
| H | 1.02784100  | 1.09104000  | 2.28298500  |
| C | 2.78707700  | 1.27824200  | 3.48754700  |
| O | 1.62341700  | 0.64038600  | 3.36053100  |
| O | 3.01488900  | 2.32622400  | 2.92305900  |
| C | 3.76757300  | 0.58448800  | 4.40232000  |
| H | 3.98376000  | -0.41845800 | 4.02337300  |
| H | 4.68932300  | 1.16058100  | 4.46850100  |
| H | 3.32587500  | 0.47072400  | 5.39537100  |

#### TS4<sup>D</sup>

|   |             |             |             |
|---|-------------|-------------|-------------|
| C | 2.26675300  | -3.64270300 | -2.24305900 |
| C | 1.84784600  | -2.58730000 | -1.43366400 |
| C | 2.17869900  | -1.27159100 | -1.72193900 |
| C | 2.94193400  | -1.05303700 | -2.85927000 |
| C | 3.39229900  | -2.08194000 | -3.68150100 |
| C | 3.05213800  | -3.39318600 | -3.36751500 |
| C | 1.75286200  | -4.95941600 | -1.72670600 |
| C | 0.72369100  | -4.60267300 | -0.62849000 |
| C | 0.96987500  | -3.07938800 | -0.30387500 |
| H | 1.87168700  | -0.42782600 | -1.11087500 |
| H | 3.98759500  | -1.84317600 | -4.55459500 |
| H | 3.38410600  | -4.20762100 | -4.00289200 |
| H | 1.28316600  | -5.57316200 | -2.50135400 |
| H | 0.87343100  | -5.19558300 | 0.27328300  |
| H | 2.56954800  | -5.55086900 | -1.30097500 |
| H | 1.41357000  | -2.94015100 | 0.68408300  |
| N | -0.30701400 | -2.34874300 | -0.32196400 |
| O | -0.61133500 | -4.88059700 | -1.01278200 |
| C | -0.65022200 | -1.18608400 | 0.25563100  |
| C | -1.31293900 | -2.67001700 | -1.18827900 |
| N | -1.83089200 | -0.84877000 | -0.26335000 |
| N | -2.26278200 | -1.77727100 | -1.15516000 |
| C | -1.18238000 | -3.96517500 | -1.92400900 |



|   |             |             |             |
|---|-------------|-------------|-------------|
| H | -0.57292400 | -3.83432900 | -2.82957300 |
| H | -2.16601400 | -4.33772300 | -2.21117300 |
| C | -2.64024000 | 0.29990100  | 0.06567100  |
| C | -2.86715600 | 1.24279000  | -0.94447200 |
| C | -3.12700500 | 0.42458900  | 1.36865100  |
| C | -3.59040000 | 2.37742600  | -0.59193900 |
| C | -3.85088200 | 1.58087400  | 1.66054800  |
| C | -4.08296300 | 2.56660700  | 0.70276700  |
| H | -3.76934700 | 3.13798500  | -1.34769900 |
| H | -4.24121800 | 1.71049200  | 2.66624600  |
| C | -4.87033000 | 3.80284000  | 1.04033700  |
| C | 0.31151300  | 1.83672200  | 0.29002700  |
| C | 0.44706500  | 0.94152700  | 1.31216600  |
| H | 0.04356100  | 1.48426300  | -0.71266300 |
| C | 0.53421100  | 3.26074000  | 0.38375800  |
| C | 0.83639300  | 3.87417700  | 1.61294800  |
| C | 0.42218400  | 4.04687100  | -0.77509400 |
| C | 1.01256200  | 5.24617700  | 1.67542900  |
| H | 0.92882100  | 3.25550900  | 2.50020400  |
| C | 0.60516100  | 5.42042900  | -0.70901700 |
| H | 0.19941700  | 3.56475600  | -1.72404700 |
| C | 0.89802400  | 6.01849500  | 0.51605000  |
| H | 1.24310400  | 5.72289000  | 2.62223900  |
| H | 0.52571100  | 6.02526200  | -1.60590400 |
| H | 1.04363800  | 7.09285300  | 0.56925900  |
| C | 0.16881200  | -0.41778100 | 1.20859800  |
| H | 1.09777900  | 0.08419300  | 2.41950200  |
| O | 0.76901800  | -1.05484200 | 2.15381200  |
| N | 3.25840400  | 0.33712200  | -3.22079000 |
| O | 2.71451500  | 1.22059300  | -2.57955200 |
| O | 4.03005000  | 0.51953100  | -4.14128900 |
| H | -4.42525900 | 4.68896000  | 0.58072500  |
| H | -4.91901700 | 3.96187400  | 2.11930400  |
| H | -5.89591400 | 3.71965800  | 0.66613200  |
| C | -2.88836300 | -0.61855300 | 2.42806500  |
| H | -2.92354400 | -1.63334200 | 2.02102800  |
| H | -1.92027300 | -0.48160900 | 2.92289100  |
| H | -3.65564300 | -0.54451900 | 3.20035700  |
| C | -2.36495300 | 1.04871500  | -2.35001400 |
| H | -1.33324500 | 0.68148500  | -2.37712100 |
| H | -2.98001700 | 0.31811800  | -2.88422100 |
| H | -2.40289500 | 1.99148700  | -2.89834800 |

**E-M4**

|   |             |             |             |
|---|-------------|-------------|-------------|
| C | 4.91664400  | -0.40486500 | 0.12386400  |
| C | 3.57348000  | -0.24695100 | 0.46178300  |
| C | 2.97586500  | 1.00422400  | 0.50742800  |
| C | 3.77766000  | 2.09143500  | 0.19110100  |
| C | 5.12443100  | 1.97310300  | -0.14070100 |
| C | 5.70116100  | 0.70915800  | -0.17204200 |
| C | 5.31725400  | -1.85467000 | 0.13768000  |
| C | 4.00843600  | -2.65111800 | 0.36525200  |
| C | 2.90698600  | -1.57868100 | 0.72000800  |
| H | 1.93502100  | 1.15704700  | 0.77745400  |
| H | 5.69470100  | 2.86406500  | -0.37398700 |
| H | 6.74812400  | 0.59606500  | -0.43399100 |
| H | 5.79580000  | -2.17116800 | -0.79476700 |
| H | 4.10686700  | -3.34730500 | 1.19731200  |
| H | 6.02969100  | -2.05268000 | 0.94405600  |
| H | 2.55353000  | -1.68726400 | 1.74642200  |
| N | 1.73658800  | -1.74294100 | -0.15139200 |
| O | 3.66760700  | -3.47232300 | -0.73640300 |
| C | 0.46120600  | -1.36345000 | 0.03586100  |
| C | 1.82835200  | -2.22340600 | -1.42735600 |
| N | -0.16344800 | -1.63504700 | -1.10708500 |
| N | 0.67283200  | -2.18076100 | -2.02862600 |
| C | 3.14626600  | -2.78180800 | -1.85373900 |
| H | 3.81648800  | -1.98196900 | -2.19898600 |
| H | 3.00943300  | -3.49968900 | -2.66268500 |
| C | -1.57976400 | -1.47234200 | -1.32294700 |
| C | -2.01944200 | -0.39822300 | -2.10369800 |
| C | -2.42542900 | -2.31069800 | -0.59766800 |
| C | -3.38001400 | -0.11494300 | -2.05698800 |
| C | -3.78060100 | -1.98340700 | -0.59158400 |
| C | -4.26131700 | -0.86871300 | -1.27327300 |
| H | -3.75476300 | 0.74195900  | -2.61207200 |
| H | -4.45319900 | -2.56634600 | 0.02914800  |
| C | -5.69445600 | -0.44238900 | -1.11204800 |
| C | -0.86303000 | 1.21088600  | 0.34286900  |
| C | -1.00114600 | 0.30585400  | 1.33139400  |
| H | -0.07741500 | 1.06116300  | -0.40156200 |
| C | -1.65510100 | 2.42309900  | 0.13515600  |
| C | -2.90843200 | 2.59737500  | 0.74315600  |
| C | -1.16032600 | 3.40838000  | -0.73012700 |
| C | -3.63673200 | 3.75248600  | 0.48442600  |
| H | -3.30895100 | 1.81910500  | 1.39403100  |
| C | -1.89277900 | 4.56326500  | -0.97675400 |
| H | -0.18530400 | 3.27242000  | -1.19160100 |

|   |             |             |             |
|---|-------------|-------------|-------------|
| C | -3.13449300 | 4.73549600  | -0.36887400 |
| H | -4.60801600 | 3.88562000  | 0.95092300  |
| H | -1.49676700 | 5.32554800  | -1.64004700 |
| H | -3.71216400 | 5.63411700  | -0.56347400 |
| C | -0.11956800 | -0.85573200 | 1.36721600  |
| H | -5.69883100 | -0.70909300 | 2.26306300  |
| O | 0.24815100  | -1.47756900 | 2.33978000  |
| N | 3.16418000  | 3.42736000  | 0.18915900  |
| O | 1.95958100  | 3.49142800  | 0.36100000  |
| O | 3.89283000  | 4.38420300  | 0.00543200  |
| H | -6.07185700 | 0.05106000  | -2.01154700 |
| H | -5.77017300 | 0.26878000  | -0.28220000 |
| H | -6.33941300 | -1.29198000 | -0.87810100 |
| C | -1.90495300 | -3.48879700 | 0.17871300  |
| H | -1.08308800 | -3.98740600 | -0.34515900 |
| H | -1.58942700 | -3.17539100 | 1.17744300  |
| H | -2.70720500 | -4.21450300 | 0.32330000  |
| C | -1.08262600 | 0.42004300  | -2.95215400 |
| H | -0.09264900 | 0.53422800  | -2.49945300 |
| H | -0.93211000 | -0.05623300 | -3.92686500 |
| H | -1.49610300 | 1.41659900  | -3.12163000 |
| H | -1.73666600 | 0.38106900  | 2.13397900  |
| C | -3.83542400 | -0.93903900 | 2.39658900  |
| O | -2.90684000 | -1.75507100 | 2.32381100  |
| O | -3.81526300 | 0.28574300  | 2.66975800  |
| O | -5.10766900 | -1.46075400 | 2.13197700  |

#### Z-TS4

|   |             |             |             |
|---|-------------|-------------|-------------|
| C | -4.30251000 | -1.77978700 | -0.16215400 |
| C | -3.24617500 | -0.88234400 | -0.31338100 |
| C | -3.41058400 | 0.48082100  | -0.10927800 |
| C | -4.67880100 | 0.90213500  | 0.26646400  |
| C | -5.75709800 | 0.03567900  | 0.42252600  |
| C | -5.56770200 | -1.32288600 | 0.20121300  |
| C | -3.86608100 | -3.19053200 | -0.44860700 |
| C | -2.32389900 | -3.13485900 | -0.53929800 |
| C | -1.97094800 | -1.60570200 | -0.68906500 |
| H | -2.60451100 | 1.19275200  | -0.24703400 |
| H | -6.72015100 | 0.43440100  | 0.71679500  |
| H | -6.39454800 | -2.01546500 | 0.31903400  |
| H | -4.17450200 | -3.90429100 | 0.32139100  |
| H | -1.95344000 | -3.68284200 | -1.40598000 |
| H | -4.28958200 | -3.53658400 | -1.39713800 |
| H | -1.64917700 | -1.36471400 | -1.70273000 |

|   |             |             |             |
|---|-------------|-------------|-------------|
| N | -0.87704900 | -1.24837000 | 0.22187000  |
| O | -1.69123300 | -3.75735800 | 0.56638000  |
| C | 0.12011900  | -0.35268500 | 0.10948900  |
| C | -0.75793300 | -1.82649300 | 1.45342200  |
| N | 0.77898900  | -0.40171100 | 1.26504500  |
| N | 0.24437800  | -1.32251500 | 2.11268400  |
| C | -1.65702800 | -2.98209100 | 1.75006600  |
| H | -2.65577800 | -2.63975500 | 2.05403100  |
| H | -1.23270000 | -3.59531100 | 2.54512100  |
| C | 1.91316700  | 0.38835900  | 1.66904900  |
| C | 1.78608300  | 1.78160200  | 1.70297100  |
| C | 3.09383600  | -0.29344100 | 1.98003500  |
| C | 2.93135600  | 2.50562600  | 2.02768300  |
| C | 4.20421600  | 0.48634000  | 2.29763700  |
| C | 4.14478100  | 1.88029700  | 2.31557200  |
| H | 2.87073200  | 3.59094100  | 2.04615100  |
| H | 5.14047000  | -0.01289000 | 2.53343900  |
| C | 5.36108900  | 2.70509200  | 2.64079600  |
| C | 2.79573700  | 0.24890700  | -1.55059300 |
| C | 1.66930300  | 0.96745200  | -1.43033600 |
| H | 3.73424200  | 0.79416900  | -1.65857000 |
| C | 2.93664300  | -1.21602000 | -1.52390900 |
| C | 1.86586600  | -2.09169500 | -1.76121000 |
| C | 4.18638900  | -1.76463200 | -1.20219500 |
| C | 2.02262900  | -3.46535500 | -1.60579100 |
| H | 0.92066300  | -1.69715100 | -2.12638600 |
| C | 4.34825200  | -3.13791700 | -1.06304400 |
| H | 5.02706600  | -1.09559500 | -1.03736200 |
| C | 3.26257000  | -3.99193500 | -1.24783700 |
| H | 1.18472600  | -4.13078100 | -1.79078400 |
| H | 5.32133500  | -3.54375600 | -0.80421700 |
| H | 3.38665400  | -5.06435300 | -1.13666100 |
| C | 0.35373600  | 0.49491900  | -1.13021400 |
| O | -0.68098500 | 0.81733700  | -1.71881500 |
| N | -4.89016800 | 2.33563900  | 0.52294300  |
| O | -3.92256700 | 3.06920400  | 0.45002700  |
| O | -6.01890200 | 2.69803300  | 0.80173800  |
| H | 5.62807400  | 3.34875400  | 1.79737300  |
| H | 6.22119100  | 2.07379700  | 2.87393800  |
| H | 5.17318300  | 3.35635600  | 3.49965200  |
| C | 3.17836700  | -1.79702500 | 1.99543700  |
| H | 2.76177200  | -2.19508800 | 2.92600100  |
| H | 2.62861500  | -2.25235400 | 1.16633500  |
| H | 4.22032200  | -2.11449900 | 1.92457400  |

|   |             |            |             |
|---|-------------|------------|-------------|
| C | 0.50547600  | 2.50801500 | 1.38492800  |
| H | 0.49167100  | 2.83860600 | 0.33889800  |
| H | -0.38370900 | 1.90338600 | 1.58598700  |
| H | 0.43397800  | 3.40863400 | 1.99867700  |
| C | 1.05754600  | 3.97252000 | -2.79048500 |
| O | 1.50780200  | 3.54500400 | -1.64815900 |
| O | 0.18291800  | 3.13644200 | -3.43140500 |
| H | -0.07465400 | 2.41141200 | -2.84282200 |
| O | 1.33943300  | 5.02381100 | -3.32925500 |
| H | 1.63181400  | 2.26802400 | -1.56962200 |

**Z-M4**

|   |             |             |             |
|---|-------------|-------------|-------------|
| C | 4.17840600  | 1.30140000  | 0.05858100  |
| C | 2.95310400  | 0.64147300  | -0.03620800 |
| C | 2.78091300  | -0.64401100 | 0.45087800  |
| C | 3.88353900  | -1.24531000 | 1.04202800  |
| C | 5.12435400  | -0.62215600 | 1.14542600  |
| C | 5.27231900  | 0.66764900  | 0.64645800  |
| C | 4.08836400  | 2.67845900  | -0.54621300 |
| C | 2.57686100  | 2.94368000  | -0.75216900 |
| C | 1.92111600  | 1.51698000  | -0.70613100 |
| H | 1.83992200  | -1.17345000 | 0.37148500  |
| H | 5.94665500  | -1.14537200 | 1.61778900  |
| H | 6.22923000  | 1.17311700  | 0.72692100  |
| H | 4.52822900  | 3.45687500  | 0.08380300  |
| H | 2.34085000  | 3.39606700  | -1.71425300 |
| H | 4.61120500  | 2.70209300  | -1.50857100 |
| H | 1.69534500  | 1.19136400  | -1.72192800 |
| N | 0.66547900  | 1.52961700  | 0.05160100  |
| O | 2.07456000  | 3.86427300  | 0.20322100  |
| C | -0.48852700 | 0.86335500  | -0.11080600 |
| C | 0.48764500  | 2.39570800  | 1.08853200  |
| N | -1.30647100 | 1.33142700  | 0.83120900  |
| N | -0.71213200 | 2.29772100  | 1.58343700  |
| C | 1.61255500  | 3.31974300  | 1.41522100  |
| H | 2.40112500  | 2.77911300  | 1.95971200  |
| H | 1.25292200  | 4.13934900  | 2.03825200  |
| C | -2.68351300 | 0.99297800  | 1.08632800  |
| C | -2.97533800 | -0.16720900 | 1.80274600  |
| C | -3.65575500 | 1.88445000  | 0.61547400  |
| C | -4.32340000 | -0.45478300 | 2.01996800  |
| C | -4.98377600 | 1.54719500  | 0.86264900  |
| C | -5.33476000 | 0.38309900  | 1.55310300  |
| H | -4.58381900 | -1.35375300 | 2.57283300  |

|   |             |             |             |
|---|-------------|-------------|-------------|
| H | -5.76576900 | 2.21361100  | 0.50674900  |
| C | -6.78474600 | 0.04345600  | 1.77390700  |
| C | -2.27782800 | -2.15897800 | -1.44114500 |
| C | -2.00795700 | -0.85333300 | -1.28257400 |
| H | -3.31603000 | -2.39133600 | -1.67589400 |
| C | -1.41320200 | -3.35076700 | -1.34272100 |
| C | -0.29433700 | -3.44423900 | -0.50347400 |
| C | -1.77818800 | -4.47686700 | -2.09228400 |
| C | 0.44926400  | -4.61531200 | -0.43762800 |
| H | -0.00470900 | -2.60307700 | 0.11721000  |
| C | -1.02556600 | -5.64536800 | -2.04134500 |
| H | -2.65814100 | -4.42776100 | -2.72821500 |
| C | 0.09094800  | -5.71697600 | -1.21383800 |
| H | 1.30793800  | -4.66321900 | 0.22436100  |
| H | -1.31773800 | -6.50212400 | -2.64016500 |
| H | 0.67548200  | -6.63022200 | -1.16462700 |
| C | -0.65945000 | -0.28855200 | -1.08005300 |
| O | 0.36658700  | -0.73359100 | -1.55477800 |
| N | 3.72174100  | -2.59670700 | 1.59062000  |
| O | 2.59568900  | -3.06875300 | 1.60919400  |
| O | 4.71369600  | -3.16827300 | 2.00298000  |
| H | -7.23960400 | -0.32261600 | 0.84745400  |
| H | -7.35116300 | 0.92379700  | 2.08938000  |
| H | -6.90200900 | -0.73192500 | 2.53400300  |
| C | -3.26871300 | 3.13540600  | -0.12262600 |
| H | -2.72332900 | 3.82070200  | 0.53448800  |
| H | -2.61466900 | 2.90230100  | -0.97133200 |
| H | -4.16068400 | 3.64780600  | -0.48817800 |
| C | -1.89926000 | -1.09667700 | 2.29267900  |
| H | -1.63203700 | -1.81955100 | 1.51257700  |
| H | -0.99474400 | -0.55773100 | 2.58861900  |
| H | -2.25063400 | -1.66524900 | 3.15597500  |
| C | -0.42834500 | 2.39539700  | -2.55593600 |
| O | -1.41850500 | 1.61826400  | -2.42198200 |
| O | 0.46400900  | 2.03702200  | -3.55845700 |
| H | 0.07925100  | 1.25020600  | -3.96755400 |
| O | -0.11587400 | 3.38149000  | -1.88451600 |
| H | -2.80789100 | -0.12561900 | -1.35385200 |

**re-TS5**

|   |            |             |             |
|---|------------|-------------|-------------|
| C | 3.66636200 | -3.42160400 | -6.43787900 |
| C | 3.14449100 | -2.25179700 | -5.88126700 |
| C | 2.71503100 | -1.19894800 | -6.67435000 |
| C | 2.84139600 | -1.36441700 | -8.04794000 |

|   |             |             |             |
|---|-------------|-------------|-------------|
| C | 3.38173000  | -2.50368600 | -8.63541800 |
| C | 3.79912200  | -3.54854100 | -7.81753800 |
| C | 4.01132500  | -4.41296900 | -5.35717700 |
| C | 3.24719400  | -3.90478300 | -4.12079000 |
| C | 3.11047800  | -2.36587900 | -4.36899200 |
| H | 2.32212500  | -0.28217300 | -6.24846100 |
| H | 3.45521200  | -2.56252900 | -9.71435800 |
| H | 4.20698500  | -4.45384700 | -8.25504200 |
| H | 3.72432500  | -5.44069000 | -5.59247600 |
| H | 3.78439700  | -4.09728300 | -3.19076700 |
| H | 5.08984700  | -4.40215900 | -5.16195400 |
| H | 3.92374900  | -1.82795400 | -3.87704800 |
| N | 1.85829100  | -1.88365400 | -3.79418000 |
| O | 1.99520700  | -4.56755300 | -3.96556000 |
| C | 1.56183800  | -0.79148000 | -3.07043700 |
| C | 0.71278900  | -2.61665000 | -3.92668900 |
| N | 0.26101600  | -0.90438800 | -2.79682200 |
| N | -0.28477200 | -2.04310100 | -3.32205900 |
| C | 0.85414800  | -3.96562300 | -4.55351600 |
| H | 0.93504500  | -3.88787400 | -5.64483700 |
| H | -0.00793800 | -4.58459700 | -4.30370600 |
| C | -0.54631400 | -0.00845600 | -2.01021300 |
| C | -1.47164600 | 0.79311900  | -2.67851500 |
| C | -0.32665500 | 0.04320000  | -0.62982100 |
| C | -2.15349900 | 1.74223800  | -1.91552900 |
| C | -1.02974700 | 1.01091300  | 0.08172500  |
| C | -1.92929700 | 1.87744500  | -0.54556300 |
| H | -2.86882600 | 2.39511800  | -2.40889400 |
| H | -0.86536900 | 1.09696500  | 1.15297400  |
| C | -2.62323200 | 2.94439700  | 0.25674500  |
| C | 2.72323200  | 2.03294200  | -0.93360300 |
| C | 2.09619500  | 1.45939900  | -1.96580200 |
| H | 3.60690300  | 1.52985900  | -0.54311500 |
| C | 2.33384300  | 3.28386400  | -0.27210300 |
| C | 3.19203400  | 3.82795600  | 0.69126000  |
| C | 1.13364900  | 3.95387800  | -0.55790200 |
| C | 2.87433600  | 5.01271700  | 1.34630400  |
| H | 4.12245000  | 3.31424000  | 0.91721000  |
| C | 0.81915500  | 5.14041800  | 0.09395700  |
| H | 0.44295000  | 3.54443700  | -1.29069700 |
| C | 1.68647600  | 5.67395200  | 1.04828400  |
| H | 3.55613800  | 5.42025300  | 2.08592700  |
| H | -0.10708700 | 5.65516600  | -0.14443100 |
| H | 1.43576300  | 6.59990300  | 1.55618800  |

|   |              |              |               |
|---|--------------|--------------|---------------|
| C | 2. 60569500  | 0. 17349700  | -2. 50315800  |
| O | 3. 60552100  | -0. 41034800 | -2. 06615600  |
| N | 2. 35745300  | -0. 28642000 | -8. 92273800  |
| O | 1. 74487300  | 0. 62905700  | -8. 40380000  |
| O | 2. 58527900  | -0. 37941900 | -10. 11561200 |
| H | -3. 17080700 | 2. 50986300  | 1. 09833400   |
| H | -3. 32790500 | 3. 51174900  | -0. 35482600  |
| H | -1. 88928600 | 3. 64337800  | 0. 67178900   |
| C | 0. 62544600  | -0. 90136800 | 0. 05378900   |
| H | 0. 42291900  | -1. 93791200 | -0. 23520800  |
| H | 1. 67038700  | -0. 68213700 | -0. 18980700  |
| H | 0. 51644000  | -0. 82411900 | 1. 13696400   |
| C | -1. 73595500 | 0. 62739000  | -4. 15010500  |
| H | -0. 80969300 | 0. 62431500  | -4. 73188600  |
| H | -2. 24957700 | -0. 31979100 | -4. 34344700  |
| H | -2. 36532100 | 1. 43948300  | -4. 51763700  |
| H | 1. 22982500  | 1. 90135500  | -2. 44753200  |
| C | 3. 45066200  | 2. 11004400  | -4. 58524100  |
| S | 4. 99772000  | 2. 73493100  | -4. 86422300  |
| N | 3. 17639900  | 0. 82996400  | -4. 36475000  |
| H | 4. 06286900  | 0. 31848600  | -4. 36690200  |
| C | 2. 26807300  | 3. 02648800  | -4. 58980900  |
| C | 2. 30783600  | 4. 25367500  | -3. 92117500  |
| C | 1. 09350200  | 2. 64571200  | -5. 24489700  |
| C | 1. 18345600  | 5. 07156800  | -3. 88643500  |
| H | 3. 22459200  | 4. 54736200  | -3. 42025100  |
| C | -0. 02327100 | 3. 47855400  | -5. 23266100  |
| H | 1. 07521400  | 1. 70911200  | -5. 79519400  |
| C | 0. 01443400  | 4. 68769300  | -4. 54281600  |
| H | 1. 22107000  | 6. 01126800  | -3. 34374700  |
| H | -0. 91841800 | 3. 18724700  | -5. 77431700  |
| H | -0. 85794000 | 5. 33394200  | -4. 52799100  |

**si-TS5**

|   |             |              |              |
|---|-------------|--------------|--------------|
| C | 3. 76938400 | -4. 84454600 | -5. 19861400 |
| C | 3. 55814300 | -3. 48025100 | -5. 00345400 |
| C | 3. 60481800 | -2. 57556100 | -6. 05527200 |
| C | 3. 86174700 | -3. 10119900 | -7. 31359400 |
| C | 4. 08619500 | -4. 45609500 | -7. 54615000 |
| C | 4. 04194300 | -5. 33871200 | -6. 47357800 |
| C | 3. 66252200 | -5. 60019900 | -3. 90087600 |
| C | 3. 07934600 | -4. 59075700 | -2. 88433400 |
| C | 3. 25327800 | -3. 17524500 | -3. 55281100 |
| H | 3. 46486100 | -1. 51101900 | -5. 89805100 |



|   |              |              |              |
|---|--------------|--------------|--------------|
| H | 4. 28399000  | -4. 79750400 | -8. 55464800 |
| H | 4. 20821600  | -6. 39888200 | -6. 63435200 |
| H | 3. 02544600  | -6. 48750900 | -3. 96590000 |
| H | 3. 61543600  | -4. 61933600 | -1. 93532500 |
| H | 4. 65125300  | -5. 93677400 | -3. 57275300 |
| H | 4. 02606300  | -2. 58271100 | -3. 05877100 |
| N | 2. 00708600  | -2. 41663600 | -3. 44102500 |
| O | 1. 73372700  | -4. 88587200 | -2. 53389800 |
| C | 1. 79821700  | -1. 09982300 | -3. 31017200 |
| C | 0. 78322600  | -3. 01625900 | -3. 53828900 |
| N | 0. 47742500  | -0. 94135600 | -3. 39429200 |
| N | -0. 17447900 | -2. 13716200 | -3. 51017500 |
| C | 0. 76386700  | -4. 50910900 | -3. 49434300 |
| H | 0. 96986600  | -4. 93938500 | -4. 48373900 |
| H | -0. 20832300 | -4. 86257200 | -3. 14991000 |
| C | -0. 25366500 | 0. 29377000  | -3. 52617700 |
| C | -0. 06881300 | 1. 04647600  | -4. 69078700 |
| C | -1. 10372800 | 0. 67439500  | -2. 48674400 |
| C | -0. 75151900 | 2. 25819600  | -4. 77159700 |
| C | -1. 77106300 | 1. 89088600  | -2. 62514200 |
| C | -1. 59476900 | 2. 69904100  | -3. 74937500 |
| H | -0. 61700700 | 2. 87534200  | -5. 65623000 |
| H | -2. 43219600 | 2. 21875400  | -1. 82704300 |
| C | -2. 26442400 | 4. 04285700  | -3. 84631200 |
| C | 2. 94022100  | 2. 39945000  | -3. 14886100 |
| C | 2. 47101800  | 1. 25217900  | -2. 64870000 |
| H | 3. 67328800  | 2. 33190600  | -3. 95159900 |
| C | 2. 54426100  | 3. 74688200  | -2. 71834700 |
| C | 3. 34321600  | 4. 84247100  | -3. 06618700 |
| C | 1. 36458500  | 3. 97763500  | -1. 99581800 |
| C | 2. 99092300  | 6. 13187200  | -2. 68011100 |
| H | 4. 25336800  | 4. 67423700  | -3. 63529700 |
| C | 1. 01171800  | 5. 26537300  | -1. 61243200 |
| H | 0. 71050400  | 3. 14439500  | -1. 75371100 |
| C | 1. 82480200  | 6. 34742100  | -1. 95121500 |
| H | 3. 62677500  | 6. 96883100  | -2. 95071000 |
| H | 0. 09572300  | 5. 42787200  | -1. 05231100 |
| H | 1. 54625300  | 7. 35294800  | -1. 65226400 |
| C | 2. 89340300  | -0. 04463600 | -3. 23986900 |
| O | 3. 76131700  | -0. 14872700 | -4. 12054600 |
| N | 3. 88573800  | -2. 17887200 | -8. 45843500 |
| O | 3. 56533600  | -1. 02130500 | -8. 25804900 |
| O | 4. 21566500  | -2. 62864200 | -9. 54159600 |
| H | -2. 63514800 | 4. 23050600  | -4. 85727700 |

|   |             |             |             |
|---|-------------|-------------|-------------|
| H | -1.54875600 | 4.83689300  | -3.60614700 |
| H | -3.10222300 | 4.12340500  | -3.15024400 |
| C | -1.26283400 | -0.18856800 | -1.26857400 |
| H | -1.84930300 | -1.08524600 | -1.49339400 |
| H | -0.29023800 | -0.52386300 | -0.89804600 |
| H | -1.76515700 | 0.35928700  | -0.46927700 |
| C | 0.83952500  | 0.59035900  | -5.80156600 |
| H | 1.89281300  | 0.77079900  | -5.55902500 |
| H | 0.71907700  | -0.47859300 | -6.00635800 |
| H | 0.61466000  | 1.13393900  | -6.72071900 |
| H | 1.77314300  | 1.21428300  | -1.81466500 |
| C | 3.51929400  | -0.52021800 | -0.31913000 |
| S | 4.56079800  | 0.31508400  | 0.71772700  |
| N | 3.77470500  | -0.78567800 | -1.59499900 |
| H | 4.68783300  | -0.40249000 | -1.84791400 |
| C | 2.22583100  | -1.06535500 | 0.20890900  |
| C | 1.49638400  | -0.39450200 | 1.19713800  |
| C | 1.76486200  | -2.30983700 | -0.23868400 |
| C | 0.33559600  | -0.95610400 | 1.71937400  |
| H | 1.86546900  | 0.55968800  | 1.55918000  |
| C | 0.60663200  | -2.87569400 | 0.28708200  |
| H | 2.35542100  | -2.85647400 | -0.96437800 |
| C | -0.11249700 | -2.19839600 | 1.26942400  |
| H | -0.21974800 | -0.42451500 | 2.48601600  |
| H | 0.28364500  | -3.85249900 | -0.06147400 |
| H | -1.01274800 | -2.63742400 | 1.68833900  |

**re-M5**

|   |            |             |             |
|---|------------|-------------|-------------|
| C | 3.64519200 | -3.30745500 | -6.65020000 |
| C | 3.21040200 | -2.12084400 | -6.05888500 |
| C | 2.85289200 | -1.02216600 | -6.82584100 |
| C | 2.96522500 | -1.15224900 | -8.20279500 |
| C | 3.42404300 | -2.30971900 | -8.82347200 |
| C | 3.76465200 | -3.40357300 | -8.03500000 |
| C | 3.92054600 | -4.35811200 | -5.60754300 |
| C | 3.33601700 | -3.79350600 | -4.29227100 |
| C | 3.17068900 | -2.25024500 | -4.55205000 |
| H | 2.50291400 | -0.09554700 | -6.38821100 |
| H | 3.49286100 | -2.34374300 | -9.90383000 |
| H | 4.10585100 | -4.32319400 | -8.49940000 |
| H | 3.46308500 | -5.32465900 | -5.83839500 |
| H | 4.01096200 | -3.95129100 | -3.45081600 |
| H | 4.99819800 | -4.52322500 | -5.50307900 |
| H | 3.96610200 | -1.70741900 | -4.03646100 |

|   |             |             |              |
|---|-------------|-------------|--------------|
| N | 1.91622000  | -1.75991400 | -3.98816400  |
| O | 2.13678800  | -4.45104100 | -3.90972100  |
| C | 1.63666900  | -0.60861300 | -3.34154900  |
| C | 0.80189200  | -2.54843400 | -3.95212300  |
| N | 0.36949600  | -0.75729700 | -2.94208500  |
| N | -0.16374400 | -1.96680900 | -3.30941500  |
| C | 0.94403000  | -3.93933200 | -4.47487900  |
| H | 0.96670500  | -3.95076600 | -5.57318200  |
| H | 0.11671400  | -4.55989700 | -4.12984900  |
| C | -0.43222000 | 0.14566600  | -2.15913100  |
| C | -1.44968600 | 0.84551300  | -2.80625300  |
| C | -0.15134800 | 0.27131000  | -0.79401300  |
| C | -2.15727800 | 1.78314200  | -2.05194500  |
| C | -0.88378100 | 1.22272800  | -0.08982100  |
| C | -1.87421200 | 1.99527800  | -0.70355500  |
| H | -2.94452700 | 2.35754900  | -2.53374900  |
| H | -0.66940900 | 1.37426300  | 0.96542600   |
| C | -2.60773900 | 3.03794200  | 0.09576200   |
| C | 2.73348100  | 2.07185400  | -1.10737700  |
| C | 2.17573700  | 1.63427600  | -2.23610300  |
| H | 3.59134000  | 1.51120700  | -0.73842700  |
| C | 2.28934600  | 3.22395500  | -0.30904600  |
| C | 3.01762900  | 3.57365400  | 0.83473100   |
| C | 1.15953000  | 3.98968300  | -0.63963700  |
| C | 2.64145300  | 4.65655800  | 1.62359600   |
| H | 3.89294700  | 2.98696300  | 1.10034400   |
| C | 0.78721700  | 5.07516300  | 0.14476700   |
| H | 0.56998300  | 3.73708500  | -1.51716600  |
| C | 1.52502800  | 5.41313000  | 1.28019300   |
| H | 3.22271300  | 4.91078200  | 2.50452000   |
| H | -0.08171300 | 5.66505500  | -0.13268100  |
| H | 1.23138200  | 6.26228100  | 1.88926900   |
| C | 2.76840800  | 0.41119500  | -2.92345300  |
| O | 3.63136300  | -0.29280900 | -2.26215800  |
| N | 2.55227800  | -0.01686200 | -9.03931300  |
| O | 1.97433900  | 0.90480400  | -8.49183500  |
| O | 2.79852700  | -0.07206500 | -10.23063800 |
| H | -3.14023000 | 2.58431100  | 0.93738000   |
| H | -3.33423400 | 3.57655400  | -0.51654400  |
| H | -1.90048500 | 3.76333400  | 0.51141700   |
| C | 0.87527800  | -0.59697700 | -0.11832000  |
| H | 0.55261300  | -1.64433100 | -0.13380000  |
| H | 1.85618300  | -0.54227900 | -0.60203100  |
| H | 0.99495000  | -0.29409700 | 0.92394400   |

|   |             |             |             |
|---|-------------|-------------|-------------|
| C | -1.79772700 | 0.56377300  | -4.24218500 |
| H | -0.91092300 | 0.55610800  | -4.88214200 |
| H | -2.27266400 | -0.41867900 | -4.33277500 |
| H | -2.49318300 | 1.31340500  | -4.62395400 |
| H | 1.30992800  | 2.11546400  | -2.67953900 |
| C | 3.48964900  | 2.01250800  | -4.93957200 |
| S | 4.79542000  | 2.43305000  | -5.89274400 |
| N | 3.44430900  | 0.85257800  | -4.26795500 |
| H | 4.33307900  | 0.35579900  | -4.29891700 |
| C | 2.29425200  | 2.90005200  | -4.87160900 |
| C | 2.38842300  | 4.15785900  | -4.27082900 |
| C | 1.07700200  | 2.47230700  | -5.40280300 |
| C | 1.26006200  | 4.96272300  | -4.16724900 |
| H | 3.34127800  | 4.48422100  | -3.86619500 |
| C | -0.04385500 | 3.29622400  | -5.32395500 |
| H | 1.01807800  | 1.51423600  | -5.91346500 |
| C | 0.04055400  | 4.53314100  | -4.69081200 |
| H | 1.33355200  | 5.92777300  | -3.67557100 |
| H | -0.98158000 | 2.97213200  | -5.76410300 |
| H | -0.83688200 | 5.16824900  | -4.62047500 |

**si-M5**

|   |             |             |             |
|---|-------------|-------------|-------------|
| C | 3.83201400  | -4.88021300 | -5.11923900 |
| C | 3.63052500  | -3.53396600 | -4.81924800 |
| C | 3.74386600  | -2.54038300 | -5.78342100 |
| C | 4.05292300  | -2.96432900 | -7.06796200 |
| C | 4.27537000  | -4.29767300 | -7.40463200 |
| C | 4.16652200  | -5.26839900 | -6.41602700 |
| C | 3.63710900  | -5.74208400 | -3.89985900 |
| C | 2.98904400  | -4.81466100 | -2.84654800 |
| C | 3.25215100  | -3.35249100 | -3.36340700 |
| H | 3.61204300  | -1.49150200 | -5.52584900 |
| H | 4.51902100  | -4.55465900 | -8.42824600 |
| H | 4.32811100  | -6.31367400 | -6.65898800 |
| H | 3.00234900  | -6.61481300 | -4.08146300 |
| H | 3.43243900  | -4.95140300 | -1.85976600 |
| H | 4.60027200  | -6.11302800 | -3.53417800 |
| H | 4.03122000  | -2.85089400 | -2.78857100 |
| N | 2.02605600  | -2.55976700 | -3.24067200 |
| O | 1.60833500  | -5.09102600 | -2.65292100 |
| C | 1.84278200  | -1.24426700 | -3.02410400 |
| C | 0.80986400  | -3.10067900 | -3.55719100 |
| N | 0.54925900  | -1.03166000 | -3.27243600 |
| N | -0.11506700 | -2.19084600 | -3.58510400 |
| C | 0.74951500  | -4.59075500 | -3.66299200 |

|   |             |             |             |
|---|-------------|-------------|-------------|
| H | 1.04315800  | -4.93392900 | -4.66391300 |
| H | -0.26044800 | -4.94350700 | -3.45231000 |
| C | -0.14455900 | 0.22440300  | -3.43002900 |
| C | 0.08570500  | 0.94863300  | -4.60378500 |
| C | -1.01672000 | 0.63774000  | -2.42568900 |
| C | -0.58216100 | 2.16365600  | -4.73283800 |
| C | -1.67461200 | 1.85354900  | -2.61298800 |
| C | -1.45797000 | 2.63178800  | -3.74985700 |
| H | -0.40748200 | 2.76362100  | -5.62258100 |
| H | -2.35525600 | 2.20700500  | -1.84228700 |
| C | -2.11250900 | 3.97829900  | -3.89955800 |
| C | 2.83776600  | 2.21339700  | -2.90311300 |
| C | 2.47421400  | 1.09281900  | -2.28019100 |
| H | 3.51657600  | 2.10017800  | -3.74776000 |
| C | 2.41037700  | 3.57718000  | -2.55171100 |
| C | 3.16931300  | 4.67056300  | -2.98544300 |
| C | 1.24489100  | 3.82244800  | -1.81281000 |
| C | 2.78870600  | 5.97203900  | -2.67298500 |
| H | 4.06921300  | 4.49081500  | -3.56760600 |
| C | 0.86028200  | 5.12223800  | -1.50559900 |
| H | 0.62406900  | 2.98621000  | -1.50377000 |
| C | 1.63301400  | 6.20272500  | -1.93203000 |
| H | 3.39404500  | 6.80745600  | -3.01106400 |
| H | -0.05006500 | 5.29513900  | -0.93866400 |
| H | 1.33166500  | 7.21765300  | -1.69214100 |
| C | 3.00028200  | -0.24576300 | -2.78157000 |
| O | 3.74075400  | -0.24072600 | -3.85053400 |
| N | 4.12991800  | -1.95218500 | -8.13210200 |
| O | 3.79218200  | -0.81559700 | -7.85708200 |
| O | 4.51689300  | -2.31287300 | -9.23062300 |
| H | -2.51917500 | 4.11400200  | -4.90548700 |
| H | -1.37794000 | 4.77334800  | -3.73069000 |
| H | -2.92367000 | 4.11097100  | -3.17991200 |
| C | -1.17910700 | -0.17934100 | -1.17729600 |
| H | -1.52397400 | -1.19314000 | -1.40401400 |
| H | -0.21946000 | -0.27279300 | -0.65808900 |
| H | -1.89258000 | 0.28569200  | -0.49413800 |
| C | 1.04520300  | 0.45481600  | -5.65113600 |
| H | 2.07279100  | 0.44533500  | -5.26557500 |
| H | 0.79595900  | -0.56592500 | -5.96349200 |
| H | 1.01266700  | 1.09374800  | -6.53525100 |
| H | 1.83791400  | 1.09266100  | -1.39495400 |
| C | 3.73652000  | -0.90503700 | -0.29133900 |
| S | 5.05605900  | -0.85677200 | 0.73555600  |

|   |             |             |             |
|---|-------------|-------------|-------------|
| N | 3.86780700  | -0.84172200 | -1.62114800 |
| H | 4.82585000  | -0.70536100 | -1.93982700 |
| C | 2.37657600  | -1.13322700 | 0.28712200  |
| C | 1.86839700  | -0.26197100 | 1.25683300  |
| C | 1.67396400  | -2.30432600 | -0.01635400 |
| C | 0.67522200  | -0.55745900 | 1.90643100  |
| H | 2.43064400  | 0.63181600  | 1.50870900  |
| C | 0.48935100  | -2.60742900 | 0.65117200  |
| H | 2.08376700  | -3.01289400 | -0.72956000 |
| C | -0.01230200 | -1.73531200 | 1.61330300  |
| H | 0.28918800  | 0.12629200  | 2.65561300  |
| H | -0.03122000 | -3.53274600 | 0.42381800  |
| H | -0.93290100 | -1.97227700 | 2.13716300  |

**TS5R**

|   |             |             |             |
|---|-------------|-------------|-------------|
| C | -5.36938500 | -0.34017100 | -0.65421600 |
| C | -3.98041000 | -0.21675400 | -0.59187200 |
| C | -3.35772700 | 1.01353300  | -0.43688600 |
| C | -4.19600900 | 2.12004200  | -0.37306400 |
| C | -5.58159800 | 2.04244800  | -0.47250500 |
| C | -6.17779000 | 0.79278300  | -0.61069100 |
| C | -5.76814900 | -1.79179500 | -0.73612400 |
| C | -4.49856500 | -2.56851300 | -0.32535100 |
| C | -3.32740100 | -1.58450400 | -0.64634000 |
| H | -2.27631300 | 1.13908400  | -0.37406800 |
| H | -6.17072400 | 2.94976600  | -0.41956100 |
| H | -7.25841300 | 0.70752400  | -0.66020600 |
| H | -6.60509300 | -2.05363900 | -0.08338300 |
| H | -4.38740800 | -3.49658400 | -0.88681800 |
| H | -6.05198200 | -2.05523800 | -1.76098000 |
| H | -2.87004400 | -1.79683600 | -1.61087500 |
| N | -2.28001300 | -1.68245700 | 0.37622400  |
| O | -4.52906200 | -2.97689400 | 1.03672600  |
| C | -0.94244300 | -1.50403600 | 0.33412300  |
| C | -2.64648500 | -1.74773300 | 1.69023700  |
| N | -0.56845000 | -1.44572600 | 1.61852100  |
| N | -1.61753500 | -1.60734700 | 2.47200200  |
| C | -4.08339900 | -2.03069800 | 1.98932000  |
| H | -4.67278900 | -1.10451700 | 1.97107800  |
| H | -4.17451300 | -2.48472000 | 2.97667400  |
| C | 0.71203500  | -1.06152400 | 2.15788900  |
| C | 0.89872000  | 0.29915100  | 2.40946100  |
| C | 1.69004000  | -2.03730500 | 2.35798200  |
| C | 2.16916200  | 0.68934900  | 2.83295800  |

|   |              |              |              |
|---|--------------|--------------|--------------|
| C | 2. 93681900  | -1. 59374100 | 2. 79121900  |
| C | 3. 19732100  | -0. 23582500 | 3. 01038800  |
| H | 2. 35945500  | 1. 74532800  | 3. 00320100  |
| H | 3. 73018200  | -2. 32239100 | 2. 94200200  |
| C | 4. 57685000  | 0. 21285900  | 3. 41261600  |
| C | 2. 01660200  | -1. 48875700 | -2. 04154200 |
| C | 1. 28048500  | -1. 40377500 | -0. 88376600 |
| H | 1. 49909200  | -1. 82323100 | -2. 93506600 |
| C | 3. 48876100  | -1. 53034700 | -2. 07580000 |
| C | 4. 14363900  | -1. 59530700 | -3. 31289300 |
| C | 4. 26162700  | -1. 54040400 | -0. 90656000 |
| C | 5. 52876900  | -1. 65542300 | -3. 38349000 |
| H | 3. 54984600  | -1. 57592200 | -4. 22282400 |
| C | 5. 64996500  | -1. 59733700 | -0. 97744900 |
| H | 3. 77830100  | -1. 51392300 | 0. 06613100  |
| C | 6. 28831100  | -1. 65301400 | -2. 21386100 |
| H | 6. 01867400  | -1. 69796200 | -4. 35097700 |
| H | 6. 23474400  | -1. 60493500 | -0. 06251300 |
| H | 7. 37155200  | -1. 69716000 | -2. 26701500 |
| C | -0. 13134300 | -1. 55876400 | -0. 95784400 |
| O | -0. 79088900 | -1. 81988200 | -1. 96818800 |
| N | -3. 58236300 | 3. 43799900  | -0. 15339000 |
| O | -2. 41767600 | 3. 46259400  | 0. 19982500  |
| O | -4. 27921700 | 4. 42285700  | -0. 32369100 |
| H | 4. 91840100  | -0. 31387000 | 4. 30877000  |
| H | 4. 60189800  | 1. 28584100  | 3. 61345700  |
| H | 5. 29616600  | 0. 00257700  | 2. 61432300  |
| C | 1. 42340400  | -3. 48135800 | 2. 03519500  |
| H | 0. 46352200  | -3. 81380800 | 2. 44125900  |
| H | 1. 39966800  | -3. 63057000 | 0. 94882600  |
| H | 2. 20918100  | -4. 11873400 | 2. 44427300  |
| C | -0. 21294700 | 1. 29050400  | 2. 20151400  |
| H | -0. 45453000 | 1. 37832300  | 1. 13437600  |
| H | -1. 11392100 | 0. 98903000  | 2. 74618600  |
| H | 0. 08766900  | 2. 27732600  | 2. 55604000  |
| H | 1. 73688500  | -1. 07502000 | 0. 03868500  |
| C | 0. 96158800  | 1. 46354300  | -1. 65750400 |
| S | 1. 66327800  | 0. 90604000  | -3. 14337700 |
| N | -0. 24807500 | 1. 20159200  | -1. 27398000 |
| H | -0. 70641700 | 0. 69175500  | -2. 03559300 |
| C | 1. 82198900  | 2. 22638600  | -0. 69593800 |
| C | 3. 17623700  | 1. 91687800  | -0. 53566500 |
| C | 1. 26363100  | 3. 25570000  | 0. 06909000  |
| C | 3. 95543400  | 2. 61483800  | 0. 38279800  |

|   |            |            |             |
|---|------------|------------|-------------|
| H | 3.61252800 | 1.13433700 | -1.14917600 |
| C | 2.04994100 | 3.97091000 | 0.96890400  |
| H | 0.21099600 | 3.49149500 | -0.06078000 |
| C | 3.39735600 | 3.65008100 | 1.13136300  |
| H | 5.00457400 | 2.35925400 | 0.50104100  |
| H | 1.61064900 | 4.78427400 | 1.53942900  |
| H | 4.01075200 | 4.21030500 | 1.83133500  |

**TS5R'**

|   |             |             |             |
|---|-------------|-------------|-------------|
| C | 5.62100100  | 0.21859000  | -0.72364800 |
| C | 4.22969200  | 0.17391800  | -0.79558800 |
| C | 3.54444100  | -1.01806000 | -0.98940600 |
| C | 4.31751800  | -2.16536800 | -1.09574200 |
| C | 5.70923500  | -2.15771700 | -1.04340700 |
| C | 6.36974700  | -0.94966700 | -0.85646300 |
| C | 6.10908100  | 1.62453000  | -0.49871700 |
| C | 4.84466300  | 2.45430200  | -0.17285300 |
| C | 3.62898100  | 1.54918000  | -0.59710400 |
| H | 2.46312600  | -1.05560400 | -1.07222100 |
| H | 6.24941100  | -3.09137500 | -1.14107100 |
| H | 7.45333400  | -0.92412000 | -0.80378300 |
| H | 6.83397600  | 1.70458300  | 0.31742500  |
| H | 4.82158200  | 3.38639000  | -0.73752500 |
| H | 6.59552400  | 2.01205200  | -1.39950200 |
| H | 3.13441300  | 1.91388200  | -1.49678800 |
| N | 2.62571600  | 1.50909000  | 0.47352300  |
| O | 4.79956200  | 2.86805300  | 1.18336900  |
| C | 1.29873200  | 1.29332200  | 0.42571100  |
| C | 2.98297600  | 1.54184700  | 1.79288800  |
| N | 0.91497200  | 1.17752100  | 1.69685800  |
| N | 1.95403600  | 1.34242800  | 2.56391700  |
| C | 4.40795200  | 1.86680000  | 2.10178700  |
| H | 5.03449700  | 0.96671500  | 2.02998300  |
| H | 4.49539600  | 2.27643900  | 3.10834100  |
| C | -0.38174200 | 0.76051200  | 2.16327700  |
| C | -0.79381300 | -0.54058300 | 1.86109400  |
| C | -1.17482000 | 1.69104400  | 2.83887400  |
| C | -2.08198200 | -0.89654800 | 2.25280900  |
| C | -2.46327100 | 1.28866700  | 3.18328000  |
| C | -2.93700800 | 0.00946300  | 2.88013000  |
| H | -2.43519400 | -1.90105400 | 2.03706600  |
| H | -3.11756100 | 1.99635200  | 3.68638500  |
| C | -4.36203700 | -0.37777700 | 3.15835300  |
| C | -1.61068000 | 1.56101600  | -1.95370700 |



|   |             |             |             |
|---|-------------|-------------|-------------|
| C | -0.83262600 | 1.62697600  | -0.80477300 |
| H | -1.08654600 | 1.32079900  | -2.87376200 |
| C | -2.89062400 | 2.27092300  | -2.10910700 |
| C | -3.46156400 | 2.36774300  | -3.38561500 |
| C | -3.54830900 | 2.87717400  | -1.02959300 |
| C | -4.65280700 | 3.05224800  | -3.58175500 |
| H | -2.96791300 | 1.87662600  | -4.21943000 |
| C | -4.74545100 | 3.55733600  | -1.22580900 |
| H | -3.14110100 | 2.79589400  | -0.02660800 |
| C | -5.29976800 | 3.64927700  | -2.50017600 |
| H | -5.08372500 | 3.11393100  | -4.57589900 |
| H | -5.24910300 | 4.01365900  | -0.37958700 |
| H | -6.23595600 | 4.17782500  | -2.64982700 |
| C | 0.49963600  | 1.17611700  | -0.85433800 |
| O | 1.13575000  | 0.73039200  | -1.82331400 |
| N | 3.62879100  | -3.45538100 | -1.25618800 |
| O | 2.41743400  | -3.46574000 | -1.13979300 |
| O | 4.31378200  | -4.43685500 | -1.48356400 |
| H | -4.80874500 | 0.25022200  | 3.93311500  |
| H | -4.43521600 | -1.42434800 | 3.46574800  |
| H | -4.94219900 | -0.26236600 | 2.23504500  |
| C | -0.66598800 | 3.07530200  | 3.13872400  |
| H | 0.16018600  | 3.04862300  | 3.85584700  |
| H | -0.29665800 | 3.56916900  | 2.23275700  |
| H | -1.46269600 | 3.69195400  | 3.55840500  |
| C | 0.06998500  | -1.50753200 | 1.09527100  |
| H | -0.07484800 | -1.37656000 | 0.01410500  |
| H | 1.13360700  | -1.38959400 | 1.32672100  |
| H | -0.21362700 | -2.53448300 | 1.33406100  |
| H | -1.23964700 | 1.97309800  | 0.13582900  |
| C | -3.50006600 | -1.18500200 | -0.91807400 |
| S | -2.34741800 | -0.92487200 | -2.22806400 |
| N | -4.35047700 | -0.33665400 | -0.46575300 |
| H | -4.31028500 | 0.52075100  | -1.01726600 |
| C | -3.49548100 | -2.53862600 | -0.25531100 |
| C | -2.42723000 | -3.43174300 | -0.36998200 |
| C | -4.58695600 | -2.89597600 | 0.54740300  |
| C | -2.43252500 | -4.63680100 | 0.33103400  |
| H | -1.58548200 | -3.16936500 | -1.00251400 |
| C | -4.59449500 | -4.09898200 | 1.24351000  |
| H | -5.42119600 | -2.20646100 | 0.61502100  |
| C | -3.51092400 | -4.97183900 | 1.14536800  |
| H | -1.58959600 | -5.31515200 | 0.23750800  |
| H | -5.44945300 | -4.35989900 | 1.86062000  |

|   |             |             |            |
|---|-------------|-------------|------------|
| H | -3.51393400 | -5.91083400 | 1.69068200 |
|---|-------------|-------------|------------|

**TS5R"**

|   |             |             |             |
|---|-------------|-------------|-------------|
| C | -4.54331300 | -0.99465000 | -1.05121200 |
| C | -3.22413100 | -0.63340000 | -0.77810400 |
| C | -2.86762200 | 0.01823800  | 0.39351100  |
| C | -3.89383300 | 0.26308700  | 1.29620500  |
| C | -5.22665400 | -0.04376300 | 1.04143600  |
| C | -5.55790200 | -0.67697300 | -0.15185000 |
| C | -4.63006200 | -1.74690800 | -2.35357700 |
| C | -3.17585900 | -2.16399900 | -2.66716100 |
| C | -2.29069400 | -1.16318600 | -1.84685500 |
| H | -1.84946000 | 0.33276800  | 0.60865000  |
| H | -5.97773800 | 0.19163300  | 1.78586500  |
| H | -6.58873700 | -0.94703600 | -0.35706400 |
| H | -5.27701500 | -2.62723300 | -2.30925800 |
| H | -2.95007600 | -2.08615700 | -3.73083400 |
| H | -5.01254600 | -1.09624900 | -3.14731700 |
| H | -1.86514100 | -0.37588100 | -2.46717600 |
| N | -1.18921900 | -1.87848100 | -1.18714900 |
| O | -2.92166000 | -3.52662400 | -2.35259800 |
| C | 0.02446000  | -1.46347900 | -0.78486200 |
| C | -1.40248200 | -3.10755900 | -0.62938400 |
| N | 0.48220100  | -2.43215000 | 0.01228700  |
| N | -0.39415300 | -3.47227200 | 0.10693900  |
| C | -2.67289300 | -3.80798300 | -0.98972700 |
| H | -3.49215300 | -3.47768000 | -0.33596300 |
| H | -2.55220200 | -4.88656900 | -0.88451300 |
| C | 1.66338900  | -2.40858300 | 0.83690500  |
| C | 1.75346300  | -1.42854800 | 1.83431000  |
| C | 2.66587000  | -3.34497500 | 0.57557600  |
| C | 2.93523000  | -1.39538700 | 2.57140200  |
| C | 3.82220800  | -3.26765600 | 1.35086000  |
| C | 3.97744800  | -2.29691600 | 2.34198000  |
| H | 3.04450900  | -0.63672300 | 3.34226100  |
| H | 4.62320400  | -3.97852600 | 1.16606600  |
| C | 5.25119700  | -2.19465300 | 3.13734800  |
| C | 2.67181600  | 1.17693400  | -1.36596300 |
| C | 2.03812400  | -0.01743900 | -1.11884500 |
| H | 2.11547100  | 1.93303400  | -1.91088800 |
| C | 4.11958600  | 1.36263900  | -1.24347800 |
| C | 4.72434100  | 2.44114500  | -1.90274800 |
| C | 4.92161700  | 0.48985500  | -0.49484500 |
| C | 6.09878100  | 2.62789500  | -1.84148600 |

|   |              |              |              |
|---|--------------|--------------|--------------|
| H | 4. 10028100  | 3. 13735700  | -2. 45640400 |
| C | 6. 29622700  | 0. 68068200  | -0. 42987800 |
| H | 4. 46405600  | -0. 32655300 | 0. 05836000  |
| C | 6. 88875500  | 1. 74582500  | -1. 10623500 |
| H | 6. 55508500  | 3. 46615100  | -2. 35800000 |
| H | 6. 90827700  | 0. 00229500  | 0. 15652800  |
| H | 7. 96256200  | 1. 89520600  | -1. 05077400 |
| C | 0. 62530100  | -0. 12323300 | -1. 16853400 |
| O | -0. 19750400 | 0. 74488100  | -1. 45808600 |
| N | -3. 54986700 | 0. 83622100  | 2. 60191900  |
| O | -2. 39599900 | 0. 73018400  | 2. 97402900  |
| O | -4. 44122900 | 1. 36528400  | 3. 24240300  |
| H | 5. 93316500  | -3. 01584200 | 2. 90743300  |
| H | 5. 04634700  | -2. 20875300 | 4. 21156100  |
| H | 5. 76484800  | -1. 25260300 | 2. 91860300  |
| C | 2. 51723800  | -4. 38110500 | -0. 50593400 |
| H | 1. 77321300  | -5. 13442700 | -0. 23132300 |
| H | 2. 19568800  | -3. 93282700 | -1. 45149900 |
| H | 3. 46898300  | -4. 88642600 | -0. 67861500 |
| C | 0. 65853700  | -0. 42731700 | 2. 09111800  |
| H | 0. 75954400  | 0. 45475600  | 1. 44145500  |
| H | -0. 33603200 | -0. 86160500 | 1. 95114400  |
| H | 0. 71422700  | -0. 06563900 | 3. 11946400  |
| H | 2. 60535700  | -0. 87429300 | -0. 77816000 |
| C | 0. 33895700  | 3. 49740900  | -0. 71990100 |
| S | 1. 74553200  | 3. 18805200  | 0. 29223700  |
| N | 0. 39814400  | 3. 85096600  | -1. 95710000 |
| H | 1. 38177300  | 3. 94341100  | -2. 22184300 |
| C | -1. 04598600 | 3. 40350400  | -0. 13773300 |
| C | -1. 27901600 | 3. 47350700  | 1. 23629200  |
| C | -2. 14557200 | 3. 32760100  | -1. 00452900 |
| C | -2. 58141900 | 3. 50826900  | 1. 73406800  |
| H | -0. 42888600 | 3. 51927500  | 1. 90944600  |
| C | -3. 44272800 | 3. 34676400  | -0. 50849900 |
| H | -1. 95095400 | 3. 27161500  | -2. 06982700 |
| C | -3. 66732200 | 3. 44941100  | 0. 86555700  |
| H | -2. 74804400 | 3. 56775100  | 2. 80613000  |
| H | -4. 28473900 | 3. 28786900  | -1. 19314500 |
| H | -4. 68034000 | 3. 46896800  | 1. 25823300  |

**TS5R'''**

|   |             |              |              |
|---|-------------|--------------|--------------|
| C | 0. 49942200 | -4. 27551400 | -0. 31476900 |
| C | 0. 46211100 | -2. 89104100 | -0. 17076200 |
| C | 0. 19628100 | -2. 28807000 | 1. 04965100  |

|   |             |             |             |
|---|-------------|-------------|-------------|
| C | -0.02042700 | -3.13448900 | 2.12666000  |
| C | -0.00852400 | -4.52273300 | 2.01810900  |
| C | 0.25491400  | -5.10097600 | 0.78206200  |
| C | 0.80300400  | -4.66004300 | -1.73879000 |
| C | 1.22345400  | -3.34738600 | -2.44123000 |
| C | 0.76030400  | -2.19436800 | -1.47858100 |
| H | 0.12943700  | -1.21132600 | 1.17163900  |
| H | -0.20007500 | -5.12537100 | 2.89756600  |
| H | 0.27505000  | -6.18097300 | 0.67994200  |
| H | 1.59497500  | -5.40992900 | -1.82869000 |
| H | 0.74123500  | -3.23698100 | -3.41190200 |
| H | -0.09062100 | -5.07300200 | -2.21769100 |
| H | -0.10557300 | -1.64208400 | -1.85798300 |
| N | 1.85293800  | -1.23441800 | -1.29178900 |
| O | 2.61387800  | -3.30381100 | -2.73677800 |
| C | 1.79606800  | 0.05961300  | -0.95134700 |
| C | 3.16378400  | -1.61441300 | -1.22725100 |
| N | 3.04747900  | 0.41896700  | -0.69448500 |
| N | 3.92388800  | -0.61707900 | -0.87692300 |
| C | 3.46369400  | -3.02021700 | -1.64373700 |
| H | 3.30892800  | -3.71416400 | -0.80571400 |
| H | 4.49546600  | -3.10559600 | -1.98589000 |
| C | 3.50567000  | 1.72369300  | -0.29465200 |
| C | 3.87098400  | 1.90461300  | 1.04012000  |
| C | 3.57170000  | 2.72880300  | -1.26322400 |
| C | 4.31561500  | 3.17394500  | 1.40630800  |
| C | 4.02111700  | 3.97769500  | -0.84253100 |
| C | 4.39342100  | 4.21696500  | 0.48278900  |
| H | 4.60502700  | 3.35080700  | 2.43877700  |
| H | 4.08608500  | 4.78360100  | -1.56941900 |
| C | 4.85602400  | 5.58693800  | 0.90103700  |
| C | -1.35573800 | 1.52282800  | 0.38086500  |
| C | -0.00216900 | 1.25753100  | 0.28435200  |
| H | -1.88633400 | 1.70879600  | -0.54883500 |
| C | -2.06116800 | 1.85541800  | 1.61374400  |
| C | -3.32694900 | 2.45256900  | 1.53209300  |
| C | -1.51558900 | 1.58451000  | 2.87904000  |
| C | -4.02157000 | 2.79326700  | 2.68908300  |
| H | -3.76721300 | 2.63722200  | 0.55655900  |
| C | -2.21371100 | 1.91628600  | 4.02893000  |
| H | -0.55929300 | 1.07814900  | 2.96135700  |
| C | -3.46666900 | 2.52781800  | 3.93645200  |
| H | -5.00194500 | 3.25163500  | 2.61143600  |
| H | -1.78949600 | 1.68777400  | 5.00152800  |

|   |             |             |             |
|---|-------------|-------------|-------------|
| H | -4.01305200 | 2.78277700  | 4.83924100  |
| C | 0.49309100  | 0.83680700  | -0.97129100 |
| O | -0.06000200 | 0.84342800  | -2.07296600 |
| N | -0.25593100 | -2.53258200 | 3.44459600  |
| O | -0.04096800 | -1.33842900 | 3.56700400  |
| O | -0.62976300 | -3.26217400 | 4.34400200  |
| H | 5.59518900  | 5.98351200  | 0.19963600  |
| H | 5.30239000  | 5.57001400  | 1.89740600  |
| H | 4.01575700  | 6.28849300  | 0.92042900  |
| C | 3.18183300  | 2.46430900  | -2.69282700 |
| H | 3.71705200  | 1.59619100  | -3.09154600 |
| H | 2.10904300  | 2.26503200  | -2.78989700 |
| H | 3.42005500  | 3.32688500  | -3.31695100 |
| C | 3.79244100  | 0.77466500  | 2.03080100  |
| H | 2.77689600  | 0.36800900  | 2.10139400  |
| H | 4.45533400  | -0.04750300 | 1.74405600  |
| H | 4.08226000  | 1.11754500  | 3.02516700  |
| H | 0.64179700  | 1.17841900  | 1.15458500  |
| C | -4.07667800 | -0.11453800 | -0.33191800 |
| S | -2.51922900 | -0.90118400 | -0.08894900 |
| N | -4.98110200 | 0.00085800  | 0.57309900  |
| H | -4.64870900 | -0.45392500 | 1.42614700  |
| C | -4.37793200 | 0.53040000  | -1.66151500 |
| C | -3.39747200 | 0.71631700  | -2.64038800 |
| C | -5.67762300 | 0.99010200  | -1.91573500 |
| C | -3.70749900 | 1.35236500  | -3.84143300 |
| H | -2.38673200 | 0.37043600  | -2.44735100 |
| C | -5.98777800 | 1.61337300  | -3.11792200 |
| H | -6.43195800 | 0.84606900  | -1.14999900 |
| C | -5.00158400 | 1.79916700  | -4.08720100 |
| H | -2.93023200 | 1.49658000  | -4.58621700 |
| H | -7.00189100 | 1.95649200  | -3.30163200 |
| H | -5.24294800 | 2.29047000  | -5.02527400 |

### TS5S

|   |            |             |             |
|---|------------|-------------|-------------|
| C | 5.19590500 | 0.38164600  | -0.45817100 |
| C | 3.93041000 | -0.15687500 | -0.68873600 |
| C | 3.76082300 | -1.43163700 | -1.21011000 |
| C | 4.91819300 | -2.15335200 | -1.47050000 |
| C | 6.19812500 | -1.64873700 | -1.25343600 |
| C | 6.33888800 | -0.36252800 | -0.74564900 |
| C | 5.09602500 | 1.78311400  | 0.08433900  |
| C | 3.60214100 | 1.98751900  | 0.43077300  |
| C | 2.84666200 | 0.82427500  | -0.30573600 |

|   |             |             |             |
|---|-------------|-------------|-------------|
| H | 2.77833300  | -1.83754000 | -1.42683500 |
| H | 7.05875500  | -2.26453500 | -1.48369300 |
| H | 7.32811700  | 0.04837600  | -0.57168200 |
| H | 5.71664800  | 1.95043300  | 0.97005400  |
| H | 3.21988800  | 2.94265500  | 0.07110500  |
| H | 5.41296700  | 2.50717400  | -0.67337700 |
| H | 2.29723100  | 1.19731200  | -1.16702400 |
| N | 1.86926200  | 0.20825900  | 0.59221100  |
| O | 3.37794400  | 2.02154600  | 1.83369800  |
| C | 0.65996700  | -0.31950200 | 0.35015900  |
| C | 2.11094500  | 0.07691000  | 1.92934100  |
| N | 0.23460100  | -0.77930500 | 1.52865300  |
| N | 1.12698000  | -0.52563700 | 2.52994600  |
| C | 3.32964700  | 0.75596000  | 2.46327200  |
| H | 4.23268000  | 0.16080700  | 2.26974800  |
| H | 3.23307000  | 0.91412400  | 3.53764400  |
| C | -0.97443500 | -1.50873100 | 1.81119800  |
| C | -1.09543600 | -2.81394400 | 1.32535200  |
| C | -1.97341100 | -0.85781700 | 2.53835700  |
| C | -2.29252200 | -3.47573000 | 1.58669500  |
| C | -3.15132200 | -1.56793300 | 2.77096100  |
| C | -3.32915600 | -2.86942700 | 2.30018800  |
| H | -2.41999000 | -4.49067800 | 1.21837400  |
| H | -3.95113300 | -1.08364500 | 3.32508400  |
| C | -4.61953200 | -3.60912300 | 2.53310900  |
| C | -2.09095000 | 0.08303700  | -2.17639800 |
| C | -1.39786100 | -0.18180400 | -1.00606500 |
| H | -1.52991200 | -0.01031500 | -3.10233200 |
| C | -3.55804800 | -0.04687700 | -2.29424900 |
| C | -4.16609100 | 0.15199400  | -3.54033100 |
| C | -4.36027400 | -0.40592700 | -1.20450900 |
| C | -5.53895400 | 0.01040600  | -3.69233100 |
| H | -3.54838200 | 0.43448200  | -4.38903400 |
| C | -5.73565300 | -0.54456800 | -1.35608700 |
| H | -3.90810100 | -0.59430000 | -0.23523100 |
| C | -6.33045900 | -0.33530600 | -2.59782700 |
| H | -5.99433500 | 0.17061300  | -4.66450800 |
| H | -6.34425600 | -0.82360100 | -0.50134000 |
| H | -7.40405000 | -0.44574100 | -2.71470100 |
| C | 0.00487200  | -0.34519200 | -1.01669600 |
| O | 0.78165500  | -0.48220700 | -1.97327000 |
| N | 4.78355800  | -3.51883500 | -1.99823500 |
| O | 3.66074700  | -3.98194600 | -2.08617200 |
| O | 5.80198300  | -4.10971900 | -2.31110600 |

|   |             |             |             |
|---|-------------|-------------|-------------|
| H | -4.43544100 | -4.59680100 | 2.96547100  |
| H | -5.15245000 | -3.76051200 | 1.58882500  |
| H | -5.27833600 | -3.05839800 | 3.20770400  |
| C | -1.79725200 | 0.55895500  | 3.01043700  |
| H | -1.02535700 | 0.62641100  | 3.78339900  |
| H | -1.49409100 | 1.21664600  | 2.18775200  |
| H | -2.73198600 | 0.94366900  | 3.42119700  |
| C | 0.00130400  | -3.47225000 | 0.53205800  |
| H | 0.01970200  | -3.10471400 | -0.50040100 |
| H | 0.98596000  | -3.29229500 | 0.97473000  |
| H | -0.15637100 | -4.55131400 | 0.49141600  |
| H | -1.89293600 | -0.08832400 | -0.04657600 |
| C | -0.91760300 | 2.78421100  | -1.08032600 |
| S | -2.01789000 | 2.59308200  | -2.42236900 |
| N | 0.32463700  | 2.43707400  | -1.12067400 |
| H | 0.52364900  | 2.11956600  | -2.07383400 |
| C | -1.43387400 | 3.26022600  | 0.24819300  |
| C | -2.80001500 | 3.28466400  | 0.54343100  |
| C | -0.52140800 | 3.64223800  | 1.24194200  |
| C | -3.24429100 | 3.68570300  | 1.80168000  |
| H | -3.50587300 | 2.98587900  | -0.22460300 |
| C | -0.96606200 | 4.04810400  | 2.49485000  |
| H | 0.53897300  | 3.61023800  | 1.01435100  |
| C | -2.33152700 | 4.07219900  | 2.77906400  |
| H | -4.30878100 | 3.69849900  | 2.01582600  |
| H | -0.24769800 | 4.35113400  | 3.25095300  |
| H | -2.67979200 | 4.39357100  | 3.75616800  |

**TS5S'**

|   |             |             |             |
|---|-------------|-------------|-------------|
| C | -4.76666300 | 0.09195600  | 0.04896100  |
| C | -3.50373300 | -0.38778300 | 0.39430900  |
| C | -3.34502600 | -1.46835900 | 1.25098000  |
| C | -4.50691800 | -2.05059000 | 1.73929000  |
| C | -5.78361200 | -1.59458800 | 1.42073000  |
| C | -5.91420200 | -0.50804900 | 0.56510200  |
| C | -4.66553800 | 1.27863900  | -0.87106700 |
| C | -3.17471700 | 1.36711100  | -1.27270900 |
| C | -2.41535700 | 0.43035000  | -0.26039100 |
| H | -2.36424500 | -1.81971300 | 1.55099100  |
| H | -6.64759500 | -2.09290000 | 1.84281000  |
| H | -6.89998600 | -0.13832900 | 0.30173600  |
| H | -5.29192900 | 1.18639500  | -1.76389600 |
| H | -2.78624300 | 2.38146600  | -1.17734800 |
| H | -4.97334900 | 2.19186800  | -0.35185200 |

|   |             |             |             |
|---|-------------|-------------|-------------|
| H | -1.85262400 | 1.03417700  | 0.46075400  |
| N | -1.45747600 | -0.42035400 | -0.97878500 |
| O | -2.97114300 | 1.03601200  | -2.63965200 |
| C | -0.23870000 | -0.86282300 | -0.62731500 |
| C | -1.69524600 | -0.86045300 | -2.25043600 |
| N | 0.20523700  | -1.55320800 | -1.67717200 |
| N | -0.69433200 | -1.55606700 | -2.70560900 |
| C | -2.92991900 | -0.34912400 | -2.91786600 |
| H | -3.82233600 | -0.87525900 | -2.54974500 |
| H | -2.85882300 | -0.47929900 | -3.99804300 |
| C | 1.46320000  | -2.23834700 | -1.81628600 |
| C | 1.65559600  | -3.43938100 | -1.13050100 |
| C | 2.43371100  | -1.64638400 | -2.62955700 |
| C | 2.89325200  | -4.06235300 | -1.28506700 |
| C | 3.65082000  | -2.31294600 | -2.75088600 |
| C | 3.89537100  | -3.51951000 | -2.09055200 |
| H | 3.07619500  | -4.99841300 | -0.76355400 |
| H | 4.42764400  | -1.87556500 | -3.37294300 |
| C | 5.20661000  | -4.23671800 | -2.26797500 |
| C | 2.27819900  | 0.40433900  | 1.82012400  |
| C | 1.76025100  | -0.28978300 | 0.72138500  |
| H | 1.60031400  | 0.56263500  | 2.65575500  |
| C | 3.71525100  | 0.41735100  | 2.16554300  |
| C | 4.14479600  | 1.10680600  | 3.30754800  |
| C | 4.65823300  | -0.28751100 | 1.40969400  |
| C | 5.48135000  | 1.09841200  | 3.68021000  |
| H | 3.41720400  | 1.66588100  | 3.88952600  |
| C | 5.99943200  | -0.29264300 | 1.78165800  |
| H | 4.34222400  | -0.85552600 | 0.53987400  |
| C | 6.41530400  | 0.40045600  | 2.91457400  |
| H | 5.79680100  | 1.63978300  | 4.56645900  |
| H | 6.71949800  | -0.84669400 | 1.18757800  |
| H | 7.46154900  | 0.39510200  | 3.20403100  |
| C | 0.38488300  | -0.56959600 | 0.71372400  |
| O | -0.42718600 | -0.52095500 | 1.65808700  |
| N | -4.38241900 | -3.20627800 | 2.63840000  |
| O | -3.27023100 | -3.67116200 | 2.81194500  |
| O | -5.39969400 | -3.63634100 | 3.15326600  |
| H | 5.47878400  | -4.79406100 | -1.36849800 |
| H | 6.01370400  | -3.53727400 | -2.49845300 |
| H | 5.14421500  | -4.95356000 | -3.09385300 |
| C | 2.18404800  | -0.32623400 | -3.30752800 |
| H | 1.31624800  | -0.37525600 | -3.97155300 |
| H | 1.99424200  | 0.46491500  | -2.57228500 |



|   |             |             |             |
|---|-------------|-------------|-------------|
| H | 3.05319800  | -0.03091200 | -3.89738100 |
| C | 0.58693200  | -4.02598700 | -0.24873000 |
| H | 0.52392200  | -3.49014600 | 0.70513000  |
| H | -0.39736500 | -3.98190400 | -0.72486200 |
| H | 0.80865900  | -5.07072200 | -0.02501400 |
| H | 2.34787200  | -0.43803900 | -0.17586700 |
| C | 0.48552700  | 3.10976100  | 0.90960900  |
| S | 2.21109200  | 2.79681700  | 1.03624600  |
| N | -0.47267500 | 2.44494100  | 1.44823100  |
| H | -0.11963700 | 1.68146500  | 2.02594300  |
| C | 0.08063300  | 4.27056500  | 0.03965300  |
| C | 0.86598800  | 4.70866600  | -1.02934100 |
| C | -1.13484300 | 4.91687900  | 0.29491500  |
| C | 0.44144300  | 5.76275600  | -1.83344700 |
| H | 1.81093000  | 4.21410700  | -1.22786800 |
| C | -1.55286000 | 5.97773300  | -0.50174500 |
| H | -1.73672500 | 4.57628400  | 1.13110300  |
| C | -0.76671800 | 6.40242300  | -1.57160200 |
| H | 1.05983200  | 6.08556700  | -2.66544900 |
| H | -2.49102600 | 6.47985400  | -0.28447300 |
| H | -1.09159400 | 7.23109200  | -2.19337300 |

**TS5S"**

|   |             |             |             |
|---|-------------|-------------|-------------|
| C | -3.42939200 | -2.08590700 | -1.33471800 |
| C | -2.27791100 | -1.79082600 | -0.60372000 |
| C | -2.06864700 | -2.30502500 | 0.66824500  |
| C | -3.05868500 | -3.14134700 | 1.16999000  |
| C | -4.22593200 | -3.44658800 | 0.47450600  |
| C | -4.41464900 | -2.90844400 | -0.79364100 |
| C | -3.41403800 | -1.38406500 | -2.66651900 |
| C | -1.96589200 | -0.87795300 | -2.84043600 |
| C | -1.37953000 | -0.86183600 | -1.38755700 |
| H | -1.19329800 | -2.05082900 | 1.25507300  |
| H | -4.96013900 | -4.10108600 | 0.92776100  |
| H | -5.31594800 | -3.13709400 | -1.35288300 |
| H | -3.70225900 | -2.02350800 | -3.50522400 |
| H | -1.93508500 | 0.12947000  | -3.25728600 |
| H | -4.10387700 | -0.53298300 | -2.64249800 |
| H | -1.38445000 | 0.16206000  | -0.99115600 |
| N | 0.00812600  | -1.32489600 | -1.40183800 |
| O | -1.21836400 | -1.66666400 | -3.76259100 |
| C | 1.06868900  | -0.91198400 | -0.69300800 |
| C | 0.44236800  | -2.29979500 | -2.25336500 |
| N | 2.09047700  | -1.64889300 | -1.11567100 |

|   |              |              |              |
|---|--------------|--------------|--------------|
| N | 1. 71668600  | -2. 52206500 | -2. 10089000 |
| C | -0. 56099300 | -2. 80469700 | -3. 24009500 |
| H | -1. 25701000 | -3. 50471700 | -2. 75792800 |
| H | -0. 06209300 | -3. 31238600 | -4. 06579100 |
| C | 3. 43243200  | -1. 64066000 | -0. 59768100 |
| C | 3. 64178300  | -2. 10125000 | 0. 70376100  |
| C | 4. 45752200  | -1. 18184600 | -1. 43243100 |
| C | 4. 95366300  | -2. 07376200 | 1. 17860600  |
| C | 5. 74612200  | -1. 18085800 | -0. 90806800 |
| C | 6. 01116800  | -1. 62035000 | 0. 39222200  |
| H | 5. 14902000  | -2. 42245300 | 2. 18910000  |
| H | 6. 56467200  | -0. 82587400 | -1. 52948700 |
| C | 7. 42049000  | -1. 61145000 | 0. 92109500  |
| C | 1. 22332600  | 2. 45627000  | 0. 80948300  |
| C | 1. 74233000  | 1. 29842400  | 0. 24105600  |
| H | 0. 45084800  | 2. 31099900  | 1. 55778400  |
| C | 1. 86074800  | 3. 77836300  | 0. 80546900  |
| C | 1. 23000400  | 4. 82559700  | 1. 49326900  |
| C | 3. 08105800  | 4. 02637100  | 0. 16566700  |
| C | 1. 79961500  | 6. 09125100  | 1. 53078000  |
| H | 0. 27563300  | 4. 63965300  | 1. 98006500  |
| C | 3. 65259100  | 5. 29275300  | 0. 20785800  |
| H | 3. 59178500  | 3. 22636600  | -0. 36091100 |
| C | 3. 01363800  | 6. 32816200  | 0. 88712000  |
| H | 1. 29771200  | 6. 89374300  | 2. 06175000  |
| H | 4. 60038400  | 5. 47285600  | -0. 28968700 |
| H | 3. 46173300  | 7. 31644400  | 0. 91772000  |
| C | 0. 93660100  | 0. 14963600  | 0. 37061000  |
| O | -0. 01667400 | -0. 03587700 | 1. 13993800  |
| N | -2. 86190800 | -3. 73383200 | 2. 50087100  |
| O | -1. 79163600 | -3. 54647600 | 3. 05062200  |
| O | -3. 77708800 | -4. 38521400 | 2. 97274300  |
| H | 8. 04035900  | -2. 33934600 | 0. 38800100  |
| H | 7. 44762000  | -1. 85936700 | 1. 98412700  |
| H | 7. 88300300  | -0. 62932100 | 0. 78761100  |
| C | 4. 17436600  | -0. 71111900 | -2. 83336700 |
| H | 3. 89976400  | -1. 54840100 | -3. 48190600 |
| H | 3. 34653400  | 0. 00513500  | -2. 85851000 |
| H | 5. 05529700  | -0. 22538600 | -3. 25623500 |
| C | 2. 51557000  | -2. 61129700 | 1. 56364600  |
| H | 1. 90046600  | -1. 79494600 | 1. 95722200  |
| H | 1. 85803400  | -3. 28526500 | 1. 00480300  |
| H | 2. 91493600  | -3. 16235700 | 2. 41656400  |
| H | 2. 53994100  | 1. 30696600  | -0. 49347400 |

|   |             |             |             |
|---|-------------|-------------|-------------|
| C | -2.07419500 | 3.54306300  | 0.06558000  |
| S | -0.74083700 | 2.74646300  | -0.78032200 |
| N | -2.09520900 | 4.77679200  | 0.41637800  |
| H | -1.23912900 | 5.22846400  | 0.08317000  |
| C | -3.28406600 | 2.71479600  | 0.38639000  |
| C | -3.18708200 | 1.36702300  | 0.75050700  |
| C | -4.54706800 | 3.31020000  | 0.31897300  |
| C | -4.33601700 | 0.62850000  | 1.02339600  |
| H | -2.20417400 | 0.91252300  | 0.85133800  |
| C | -5.69455300 | 2.56803100  | 0.58067800  |
| H | -4.60971400 | 4.35984400  | 0.05027600  |
| C | -5.59282100 | 1.22290200  | 0.92949500  |
| H | -4.24796100 | -0.41448300 | 1.31767100  |
| H | -6.67010600 | 3.04012300  | 0.51105800  |
| H | -6.48763500 | 0.64348200  | 1.13656100  |

**TS5S'''**

|   |             |            |             |
|---|-------------|------------|-------------|
| C | 2.93522300  | 3.15931800 | -0.24290700 |
| C | 1.79205100  | 2.58646700 | 0.31290200  |
| C | 1.15771500  | 3.13985400 | 1.41666100  |
| C | 1.71557800  | 4.30310400 | 1.93183000  |
| C | 2.85702300  | 4.90207600 | 1.40455200  |
| C | 3.47546600  | 4.32127400 | 0.30427900  |
| C | 3.43367700  | 2.35178000 | -1.41001100 |
| C | 2.30778800  | 1.34351000 | -1.72566800 |
| C | 1.39759200  | 1.33633400 | -0.44069800 |
| H | 0.28328900  | 2.68065600 | 1.86762600  |
| H | 3.24076000  | 5.80838300 | 1.85632300  |
| H | 4.36471100  | 4.77378200 | -0.12240900 |
| H | 3.66567600  | 2.95457100 | -2.29305000 |
| H | 2.69963400  | 0.34155600 | -1.90669700 |
| H | 4.34391000  | 1.80910500 | -1.13405700 |
| H | 1.55677300  | 0.42543300 | 0.15489100  |
| N | -0.01192800 | 1.37581300 | -0.83665500 |
| O | 1.61156800  | 1.67404600 | -2.92236100 |
| C | -1.07371100 | 0.76333700 | -0.29980100 |
| C | -0.44976400 | 2.05581700 | -1.93881600 |
| N | -2.10684100 | 1.09658000 | -1.06496400 |
| N | -1.73178600 | 1.90338000 | -2.10444000 |
| C | 0.60803900  | 2.66290400 | -2.80091400 |
| H | 0.98680000  | 3.59593100 | -2.36103300 |
| H | 0.21421800  | 2.87089300 | -3.79611900 |
| C | -3.47777100 | 0.69831700 | -0.88959600 |
| C | -4.18469100 | 1.20372700 | 0.20356700  |

|   |             |             |             |
|---|-------------|-------------|-------------|
| C | -4.02838900 | -0.17563700 | -1.83229000 |
| C | -5.50693400 | 0.78405300  | 0.34668100  |
| C | -5.35363100 | -0.55642200 | -1.64304200 |
| C | -6.10499700 | -0.08896400 | -0.56209200 |
| H | -6.08293100 | 1.15458300  | 1.19054200  |
| H | -5.80786700 | -1.24054200 | -2.35539600 |
| C | -7.54434400 | -0.49886300 | -0.40259300 |
| C | -0.67559100 | -2.35386600 | 1.67834200  |
| C | -1.18096100 | -1.46899000 | 0.73366900  |
| H | -0.51946000 | -1.95676700 | 2.67581600  |
| C | -0.77957700 | -3.81380500 | 1.57959900  |
| C | -0.53095400 | -4.58663900 | 2.72304100  |
| C | -1.09469500 | -4.46473200 | 0.37987700  |
| C | -0.60369700 | -5.97177400 | 2.67209800  |
| H | -0.25984500 | -4.08503300 | 3.64802600  |
| C | -1.16739600 | -5.85235800 | 0.32921700  |
| H | -1.25739600 | -3.89032500 | -0.52618300 |
| C | -0.92164100 | -6.60866500 | 1.47241000  |
| H | -0.40321100 | -6.55662900 | 3.56402800  |
| H | -1.40012400 | -6.34575200 | -0.60885300 |
| H | -0.96931800 | -7.69214300 | 1.42798300  |
| C | -0.96799700 | -0.09463900 | 0.94236900  |
| O | -0.53109700 | 0.48769800  | 1.94217100  |
| N | 1.06318800  | 4.93684900  | 3.08600300  |
| O | 0.01407000  | 4.45790400  | 3.47633000  |
| O | 1.60550900  | 5.90934800  | 3.58135900  |
| H | -8.19134300 | 0.11797500  | -1.03532800 |
| H | -7.87985800 | -0.38165700 | 0.63012100  |
| H | -7.69365600 | -1.54083900 | -0.69667800 |
| C | -3.22430400 | -0.67894200 | -3.00046300 |
| H | -3.04391000 | 0.11951800  | -3.72641900 |
| H | -2.24553300 | -1.05709300 | -2.68658900 |
| H | -3.75316100 | -1.48881600 | -3.50578200 |
| C | -3.55715700 | 2.16305700  | 1.17992900  |
| H | -2.81299400 | 1.67242400  | 1.81608100  |
| H | -3.05725200 | 2.98710700  | 0.66012100  |
| H | -4.32075700 | 2.59065300  | 1.83172200  |
| H | -1.52156200 | -1.79622800 | -0.24242900 |
| C | 2.36627200  | -2.93766400 | 0.25315800  |
| S | 1.85649500  | -1.93758800 | 1.61613700  |
| N | 2.06549300  | -4.16149700 | 0.02066800  |
| H | 1.49140400  | -4.52653800 | 0.78326200  |
| C | 3.24739100  | -2.26647000 | -0.76590000 |
| C | 4.25998200  | -1.38053300 | -0.38355500 |

|   |            |             |             |
|---|------------|-------------|-------------|
| C | 3.08888200 | -2.56645800 | -2.12220300 |
| C | 5.11234200 | -0.82757300 | -1.33683200 |
| H | 4.38737500 | -1.14884000 | 0.66961100  |
| C | 3.91233600 | -1.97878500 | -3.07936500 |
| H | 2.31466100 | -3.27115600 | -2.40901600 |
| C | 4.93304200 | -1.11316700 | -2.68957200 |
| H | 5.92159300 | -0.17475100 | -1.02126700 |
| H | 3.76628000 | -2.20765900 | -4.13082100 |
| H | 5.58932000 | -0.67178700 | -3.43350300 |

**M5R**

|   |             |             |             |
|---|-------------|-------------|-------------|
| C | -4.12784000 | -2.94964700 | -0.09221300 |
| C | -2.93813300 | -2.43098700 | 0.41537500  |
| C | -2.39770300 | -2.87650800 | 1.61496800  |
| C | -3.09883200 | -3.87779000 | 2.27319400  |
| C | -4.29306900 | -4.41708500 | 1.79868300  |
| C | -4.81556500 | -3.94416600 | 0.60185600  |
| C | -4.49846800 | -2.29258700 | -1.39414200 |
| C | -3.26374800 | -1.45395800 | -1.79932100 |
| C | -2.36305900 | -1.37967400 | -0.50907300 |
| H | -1.48938700 | -2.43754900 | 2.01838800  |
| H | -4.78974200 | -5.19493000 | 2.36536100  |
| H | -5.74308100 | -4.35218500 | 0.21335600  |
| H | -4.74391700 | -3.00970000 | -2.18390000 |
| H | -3.54311600 | -0.44601000 | -2.10566100 |
| H | -5.37153300 | -1.64521500 | -1.26261900 |
| H | -2.37260800 | -0.38249200 | -0.06017800 |
| N | -0.97466900 | -1.69088300 | -0.85528900 |
| O | -2.59708500 | -1.99174400 | -2.93267500 |
| C | 0.16825400  | -1.21556200 | -0.33660300 |
| C | -0.64057400 | -2.58569300 | -1.83356800 |
| N | 1.14057400  | -1.85517000 | -0.98717100 |
| N | 0.64968100  | -2.70778200 | -1.94035400 |
| C | -1.76504300 | -3.10599300 | -2.66830600 |
| H | -2.30316800 | -3.91141500 | -2.14958200 |
| H | -1.39178500 | -3.48412100 | -3.62004600 |
| C | 2.55113700  | -1.77366900 | -0.71802100 |
| C | 3.02235900  | -2.27925400 | 0.49639100  |
| C | 3.37287400  | -1.16999100 | -1.67366900 |
| C | 4.38968800  | -2.15578600 | 0.74456800  |
| C | 4.72989200  | -1.07383700 | -1.37529900 |
| C | 5.25420200  | -1.56134100 | -0.17524500 |
| H | 4.78541600  | -2.53403900 | 1.68358700  |
| H | 5.39361100  | -0.60275000 | -2.09612900 |

|   |              |              |              |
|---|--------------|--------------|--------------|
| C | 6. 73047200  | -1. 46394100 | 0. 10626900  |
| C | 1. 16434900  | 1. 93947700  | 1. 53908900  |
| C | 1. 09554900  | 0. 81512700  | 0. 57318800  |
| H | 0. 52641700  | 1. 70503200  | 2. 39876400  |
| C | 2. 56251100  | 2. 27305500  | 2. 04259600  |
| C | 2. 74889400  | 3. 30297100  | 2. 97174900  |
| C | 3. 67402900  | 1. 53973400  | 1. 62294600  |
| C | 4. 01561900  | 3. 59716100  | 3. 46294300  |
| H | 1. 89003300  | 3. 87598100  | 3. 31166500  |
| C | 4. 94366700  | 1. 83426300  | 2. 11574500  |
| H | 3. 54689400  | 0. 72023900  | 0. 92131300  |
| C | 5. 12066400  | 2. 86437500  | 3. 03323300  |
| H | 4. 14006700  | 4. 39742400  | 4. 18590200  |
| H | 5. 79585600  | 1. 24961900  | 1. 78048700  |
| H | 6. 11024200  | 3. 09266300  | 3. 41696200  |
| C | 0. 22949500  | -0. 21777100 | 0. 77566400  |
| O | -0. 60957100 | -0. 42661800 | 1. 71631100  |
| N | -2. 55014400 | -4. 40083000 | 3. 53263400  |
| O | -1. 44992300 | -4. 01041200 | 3. 87724000  |
| O | -3. 22495600 | -5. 20249400 | 4. 15599300  |
| H | 7. 26950500  | -2. 28688100 | -0. 37535500 |
| H | 6. 93501300  | -1. 51633700 | 1. 17820500  |
| H | 7. 14613400  | -0. 52996500 | -0. 28109700 |
| C | 2. 80629900  | -0. 63247600 | -2. 95977200 |
| H | 2. 41591800  | -1. 44015500 | -3. 58602500 |
| H | 1. 98059200  | 0. 06217400  | -2. 77144500 |
| H | 3. 57564600  | -0. 10037600 | -3. 52178400 |
| C | 2. 09906600  | -2. 90776400 | 1. 50546300  |
| H | 1. 51344800  | -2. 14987800 | 2. 03804400  |
| H | 1. 39554200  | -3. 59915100 | 1. 03009800  |
| H | 2. 67221200  | -3. 46692200 | 2. 24702700  |
| H | 1. 70057100  | 0. 85814900  | -0. 32675900 |
| C | -1. 19383500 | 3. 06047200  | 0. 37220100  |
| S | 0. 49222300  | 3. 51014700  | 0. 78546500  |
| N | -1. 84482200 | 2. 04109200  | 0. 75531600  |
| H | -1. 34332500 | 1. 40225200  | 1. 38101700  |
| C | -1. 87243100 | 4. 06659700  | -0. 50697700 |
| C | -1. 17661900 | 4. 87791400  | -1. 40706700 |
| C | -3. 26539600 | 4. 17498000  | -0. 42712200 |
| C | -1. 86399500 | 5. 78135900  | -2. 21366300 |
| H | -0. 09812000 | 4. 79353900  | -1. 49267300 |
| C | -3. 94794700 | 5. 08028600  | -1. 22923500 |
| H | -3. 79288100 | 3. 53932400  | 0. 27616900  |
| C | -3. 24849600 | 5. 88670200  | -2. 12617200 |

|   |             |            |             |
|---|-------------|------------|-------------|
| H | -1.31296500 | 6.40107000 | -2.91406500 |
| H | -5.02788500 | 5.16178100 | -1.15253900 |
| H | -3.78195400 | 6.59529800 | -2.75228400 |

**M5S**

|   |             |             |             |
|---|-------------|-------------|-------------|
| C | 2.08676900  | -4.11018200 | -2.40974400 |
| C | 1.75432000  | -2.93449200 | -1.74017600 |
| C | 1.33636100  | -1.79603100 | -2.41759600 |
| C | 1.24989200  | -1.89883200 | -3.79874800 |
| C | 1.58692500  | -3.05181600 | -4.50486400 |
| C | 2.01476000  | -4.17113600 | -3.80128600 |
| C | 2.48964400  | -5.18865000 | -1.43891400 |
| C | 2.08888400  | -4.65438100 | -0.04234800 |
| C | 1.84594500  | -3.11482700 | -0.23942400 |
| H | 1.11234400  | -0.86966500 | -1.89486400 |
| H | 1.49975000  | -3.05851200 | -5.58447400 |
| H | 2.27097200  | -5.08204600 | -4.33274600 |
| H | 2.00180200  | -6.14926900 | -1.63084100 |
| H | 2.88008900  | -4.81267000 | 0.69052300  |
| H | 3.56992100  | -5.36136200 | -1.48374500 |
| H | 2.62616900  | -2.49426600 | 0.19889300  |
| N | 0.57195700  | -2.71745400 | 0.37217800  |
| O | 0.97148900  | -5.34278800 | 0.50043800  |
| C | 0.15482000  | -1.51032800 | 0.80256900  |
| C | -0.51524400 | -3.54634100 | 0.35227500  |
| N | -1.16150600 | -1.65312300 | 1.00142900  |
| N | -1.58994600 | -2.92629100 | 0.73680800  |
| C | -0.27979200 | -4.96887000 | -0.04003800 |
| H | -0.30690300 | -5.07680800 | -1.13383900 |
| H | -1.04318900 | -5.61563400 | 0.39359600  |
| C | -2.12754400 | -0.60228800 | 1.19860100  |
| C | -2.48825300 | 0.15070800  | 0.07941300  |
| C | -2.63672000 | -0.37929600 | 2.47978700  |
| C | -3.37467300 | 1.20882700  | 0.28832700  |
| C | -3.51860600 | 0.68613200  | 2.63307000  |
| C | -3.88309300 | 1.49765200  | 1.55313400  |
| H | -3.65985600 | 1.82839800  | -0.55991500 |
| H | -3.92641800 | 0.89279500  | 3.61992100  |
| C | -4.79460300 | 2.67720800  | 1.76245700  |
| C | 1.43798300  | 1.89926100  | 1.96274500  |
| C | 0.67073600  | 0.63341100  | 1.82920400  |
| H | 2.34861500  | 1.83568700  | 1.36075100  |
| C | 1.80776100  | 2.25695400  | 3.38818000  |
| C | 3.13732800  | 2.50984900  | 3.72577600  |

|   |             |             |             |
|---|-------------|-------------|-------------|
| C | 0.82987800  | 2.33272900  | 4.38573000  |
| C | 3.48963700  | 2.82189600  | 5.03685900  |
| H | 3.90115600  | 2.45794100  | 2.95445600  |
| C | 1.17973400  | 2.64836200  | 5.69400600  |
| H | -0.21161100 | 2.14947000  | 4.13093300  |
| C | 2.51173400  | 2.89262200  | 6.02415900  |
| H | 4.52930500  | 3.01333200  | 5.28427800  |
| H | 0.41105200  | 2.70734200  | 6.45869900  |
| H | 2.78378800  | 3.13886200  | 7.04583600  |
| C | 1.04663900  | -0.30979200 | 0.91635000  |
| O | 2.05650500  | -0.32359600 | 0.13223200  |
| N | 0.75054500  | -0.73839000 | -4.55089400 |
| O | 0.27269100  | 0.18199000  | -3.91351900 |
| O | 0.83236200  | -0.77227300 | -5.76704400 |
| H | -5.65453200 | 2.40988100  | 2.38352100  |
| H | -5.16269800 | 3.06518300  | 0.81013400  |
| H | -4.26268000 | 3.48780000  | 2.27227200  |
| C | -2.20347500 | -1.23159900 | 3.64195900  |
| H | -2.31582900 | -2.29681700 | 3.41908800  |
| H | -1.14896900 | -1.05506100 | 3.88564200  |
| H | -2.79567200 | -1.00066400 | 4.52943400  |
| C | -1.92825000 | -0.14059400 | -1.28622200 |
| H | -0.93635900 | 0.31377800  | -1.40596800 |
| H | -1.84662300 | -1.21793500 | -1.46672200 |
| H | -2.57417300 | 0.28294900  | -2.05841600 |
| H | -0.22629900 | 0.51666000  | 2.42177200  |
| C | 0.03757900  | 2.83213400  | -0.33577300 |
| S | 0.43647500  | 3.35023200  | 1.33869500  |
| N | 0.66316500  | 1.97255400  | -1.02545200 |
| H | 1.46395000  | 1.52937000  | -0.56837700 |
| C | -1.17906200 | 3.48230200  | -0.92466800 |
| C | -2.01750900 | 4.32625800  | -0.19156300 |
| C | -1.51022100 | 3.18161200  | -2.25260400 |
| C | -3.16820500 | 4.85642800  | -0.77039300 |
| H | -1.78773000 | 4.56153200  | 0.84233500  |
| C | -2.66519600 | 3.70252800  | -2.82413400 |
| H | -0.85208200 | 2.52772200  | -2.81653500 |
| C | -3.50031300 | 4.54082100  | -2.08483700 |
| H | -3.80814100 | 5.51107500  | -0.18645500 |
| H | -2.91270400 | 3.45740700  | -3.85254600 |
| H | -4.40025100 | 4.95020500  | -2.53363000 |

**TS6R**

|   |             |             |             |
|---|-------------|-------------|-------------|
| C | -3.88307900 | -1.36736900 | -0.48624500 |
|---|-------------|-------------|-------------|



|   |             |             |             |
|---|-------------|-------------|-------------|
| C | -2.64378500 | -1.20820900 | 0.13092800  |
| C | -2.39628000 | -1.67273200 | 1.41592200  |
| C | -3.44586100 | -2.32166400 | 2.05054400  |
| C | -4.70025000 | -2.49598400 | 1.46846500  |
| C | -4.92261000 | -2.01041800 | 0.18626600  |
| C | -3.89250600 | -0.75506200 | -1.86129000 |
| C | -2.43783200 | -0.29593500 | -2.12554900 |
| C | -1.68760600 | -0.45105300 | -0.75588800 |
| H | -1.44179900 | -1.52736600 | 1.91362100  |
| H | -5.47630000 | -3.00712500 | 2.02438500  |
| H | -5.89273100 | -2.13828400 | -0.28296100 |
| H | -4.21778000 | -1.45659000 | -2.63657000 |
| H | -2.38659000 | 0.75193800  | -2.42785400 |
| H | -4.56957700 | 0.10442600  | -1.89493100 |
| H | -1.44817100 | 0.52766600  | -0.34291700 |
| N | -0.42730000 | -1.17414400 | -0.93985200 |
| O | -1.82625800 | -1.00856700 | -3.19153900 |
| C | 0.72742600  | -1.08496300 | -0.27082300 |
| C | -0.26646000 | -2.14899600 | -1.88199800 |
| N | 1.51639400  | -2.02283200 | -0.77470100 |
| N | 0.91301000  | -2.69198700 | -1.80067100 |
| C | -1.37972400 | -2.31084400 | -2.86587300 |
| H | -2.18632100 | -2.92658000 | -2.44292400 |
| H | -1.01286500 | -2.78126300 | -3.77795400 |
| C | 2.81031900  | -2.42026600 | -0.28030800 |
| C | 2.84996600  | -3.14644700 | 0.91570900  |
| C | 3.94519600  | -2.10256100 | -1.03067900 |
| C | 4.10689300  | -3.51796900 | 1.38836800  |
| C | 5.17540200  | -2.50112900 | -0.50935800 |
| C | 5.27598700  | -3.19457000 | 0.69733500  |
| H | 4.17125200  | -4.08126900 | 2.31571400  |
| H | 6.07817100  | -2.26271000 | -1.06592700 |
| C | 6.62211000  | -3.57553400 | 1.25304200  |
| C | 1.45506800  | 2.36335700  | 1.32516200  |
| C | 1.36117200  | 1.22967900  | 0.31537700  |
| H | 1.41014100  | 1.97411700  | 2.34651800  |
| C | 2.70892900  | 3.19520300  | 1.17300800  |
| C | 3.51627300  | 3.47385900  | 2.27541900  |
| C | 3.06656600  | 3.70220200  | -0.08102600 |
| C | 4.67389500  | 4.23485700  | 2.12761900  |
| H | 3.23805900  | 3.08891700  | 3.25277700  |
| C | 4.22102900  | 4.46248600  | -0.22844700 |
| H | 2.42881200  | 3.49903000  | -0.93880700 |
| C | 5.02876100  | 4.72929700  | 0.87627300  |

|   |             |             |             |
|---|-------------|-------------|-------------|
| H | 5.29712500  | 4.44105900  | 2.99209500  |
| H | 4.49037800  | 4.84963200  | -1.20604600 |
| H | 5.93038700  | 5.32243000  | 0.76066500  |
| C | 0.97520200  | -0.05682000 | 0.83156600  |
| O | 0.66967500  | -0.38698600 | 1.97088900  |
| N | -3.22237900 | -2.85416900 | 3.40170900  |
| O | -2.09686600 | -2.77977300 | 3.86020600  |
| O | -4.17403300 | -3.34685900 | 3.98247500  |
| H | 6.56684600  | -4.50579400 | 1.82351900  |
| H | 6.99262700  | -2.79623000 | 1.92747800  |
| H | 7.35927000  | -3.70150900 | 0.45670100  |
| C | 3.84189300  | -1.39856400 | -2.35383300 |
| H | 3.47061700  | -2.08703700 | -3.12071900 |
| H | 3.13937200  | -0.56251800 | -2.32353900 |
| H | 4.82322200  | -1.03770700 | -2.66780700 |
| C | 1.59290200  | -3.53676400 | 1.64726600  |
| H | 1.12024200  | -2.67195300 | 2.12346100  |
| H | 0.86459300  | -3.98603100 | 0.96367200  |
| H | 1.82082100  | -4.26801900 | 2.42445000  |
| H | 2.22207900  | 1.13365900  | -0.35620600 |
| C | -1.37666400 | 2.49629800  | 1.18910300  |
| S | 0.05033000  | 3.58508200  | 1.12746100  |
| N | -1.47638300 | 1.46062900  | 1.92093700  |
| H | -0.66605000 | 1.31237100  | 2.52294500  |
| C | -2.51513600 | 2.82556700  | 0.27627800  |
| C | -2.35916500 | 3.61184600  | -0.86859600 |
| C | -3.76462300 | 2.25093900  | 0.55131000  |
| C | -3.44019200 | 3.82570200  | -1.72129800 |
| H | -1.38344400 | 4.01390200  | -1.11290600 |
| C | -4.83999200 | 2.46772600  | -0.30178500 |
| H | -3.87140200 | 1.63717600  | 1.43990200  |
| C | -4.67981800 | 3.25691000  | -1.44201700 |
| H | -3.30807100 | 4.43319000  | -2.61097200 |
| H | -5.80548000 | 2.02529200  | -0.07468500 |
| H | -5.52018800 | 3.42935600  | -2.10761300 |
| H | 0.55386000  | 1.50095600  | -0.68999900 |
| C | 0.38505200  | 1.24217200  | -2.81128500 |
| O | -0.11401700 | 1.84117800  | -1.78023400 |
| O | 1.22457700  | 0.33622800  | -2.76108000 |
| C | -0.15870200 | 1.69265700  | -4.15511200 |
| H | -0.71401300 | 2.62729400  | -4.06861100 |
| H | 0.66254800  | 1.80217800  | -4.86648400 |
| H | -0.82101900 | 0.90677800  | -4.53119600 |

**TS6S**

|   |             |             |             |
|---|-------------|-------------|-------------|
| C | -5.40745100 | 0.70602000  | -0.50824600 |
| C | -4.01702800 | 0.76432000  | -0.61367100 |
| C | -3.37366000 | 1.85626100  | -1.17900700 |
| C | -4.18522800 | 2.89111500  | -1.62745200 |
| C | -5.57468300 | 2.86494200  | -1.54154300 |
| C | -6.19393100 | 1.75647100  | -0.97642200 |
| C | -5.84544800 | -0.58572100 | 0.13140900  |
| C | -4.55609000 | -1.21576200 | 0.70556000  |
| C | -3.38851700 | -0.49021300 | -0.05064000 |
| H | -2.29527000 | 1.90583600  | -1.28063200 |
| H | -6.14555900 | 3.70722900  | -1.91170500 |
| H | -7.27544100 | 1.71904800  | -0.89682500 |
| H | -6.58604700 | -0.44660100 | 0.92414700  |
| H | -4.48145700 | -2.28544800 | 0.51656200  |
| H | -6.29020100 | -1.24812100 | -0.61892000 |
| H | -2.97898300 | -1.14077100 | -0.82120700 |
| N | -2.29638900 | -0.18747200 | 0.87177100  |
| O | -4.49989500 | -1.10046500 | 2.12142500  |
| C | -0.96728000 | -0.28323300 | 0.72236100  |
| C | -2.53687200 | 0.13740500  | 2.17124500  |
| N | -0.45371900 | 0.01854100  | 1.91368000  |
| N | -1.42481300 | 0.27489700  | 2.83613700  |
| C | -3.95894900 | 0.10463300  | 2.62405800  |
| H | -4.50557400 | 0.98975500  | 2.27092200  |
| H | -4.00696200 | 0.06808300  | 3.71255600  |
| C | 0.92998100  | 0.14594800  | 2.29891700  |
| C | 1.52644400  | 1.40268400  | 2.18396100  |
| C | 1.58054900  | -0.98450300 | 2.80311400  |
| C | 2.86990900  | 1.49682600  | 2.54701400  |
| C | 2.91997200  | -0.83164100 | 3.15280400  |
| C | 3.58021900  | 0.39304000  | 3.01792600  |
| H | 3.37270100  | 2.45629600  | 2.44496600  |
| H | 3.46146000  | -1.69171800 | 3.53926300  |
| C | 5.04080600  | 0.50936900  | 3.36248400  |
| C | 1.68301500  | -1.32908400 | -1.93589500 |
| C | 0.90402500  | -1.36262300 | -0.62736900 |
| H | 1.05416100  | -0.89508500 | -2.71946500 |
| C | 2.18795100  | -2.67022600 | -2.43311500 |
| C | 2.21040200  | -2.93410900 | -3.80388000 |
| C | 2.68270900  | -3.63004500 | -1.54806500 |
| C | 2.70671400  | -4.14200000 | -4.28469200 |
| H | 1.83454900  | -2.18560900 | -4.49696800 |
| C | 3.17974000  | -4.83782000 | -2.02732700 |

|   |             |             |             |
|---|-------------|-------------|-------------|
| H | 2.65731700  | -3.44030300 | -0.47899800 |
| C | 3.19320000  | -5.09686400 | -3.39575300 |
| H | 2.71181000  | -4.33689600 | -5.35250800 |
| H | 3.55226900  | -5.58056400 | -1.32905800 |
| H | 3.57873700  | -6.04103700 | -3.76757200 |
| C | -0.30934200 | -0.58486600 | -0.61405600 |
| O | -0.95842300 | -0.20101800 | -1.58341900 |
| N | -3.54538000 | 4.07519400  | -2.21918100 |
| O | -2.32884400 | 4.10966300  | -2.23992000 |
| O | -4.26978600 | 4.95519700  | -2.65082600 |
| H | 5.26555500  | 0.00373300  | 4.30579500  |
| H | 5.34605900  | 1.55462400  | 3.44712100  |
| H | 5.65603800  | 0.04168000  | 2.58597200  |
| C | 0.87854000  | -2.31064200 | 2.91978700  |
| H | -0.14648900 | -2.19500800 | 3.28349800  |
| H | 0.83144400  | -2.82296900 | 1.95067400  |
| H | 1.41561400  | -2.96019700 | 3.61386900  |
| C | 0.76075500  | 2.59774100  | 1.68634700  |
| H | 0.60169800  | 2.53492000  | 0.60308800  |
| H | -0.21258100 | 2.67772200  | 2.18040400  |
| H | 1.32170000  | 3.51231100  | 1.88799200  |
| H | 1.52218400  | -1.22050600 | 0.25961500  |
| C | 2.60031400  | 1.29652400  | -1.31033300 |
| S | 3.22522800  | -0.30641700 | -1.79944700 |
| N | 1.41591000  | 1.72251300  | -1.49476100 |
| H | 0.82745900  | 1.07384800  | -2.01690900 |
| C | 3.59812200  | 2.18417300  | -0.63503600 |
| C | 4.81657800  | 1.71128900  | -0.13817000 |
| C | 3.27726200  | 3.53814600  | -0.47689400 |
| C | 5.69540000  | 2.57603100  | 0.50942100  |
| H | 5.07572600  | 0.66215400  | -0.23457700 |
| C | 4.14906500  | 4.39574700  | 0.18333200  |
| H | 2.33669800  | 3.89919300  | -0.87905600 |
| C | 5.36200000  | 3.91705200  | 0.67918200  |
| H | 6.63937000  | 2.19661800  | 0.88810400  |
| H | 3.88776300  | 5.44269800  | 0.30152400  |
| H | 6.04669000  | 4.58921300  | 1.18703200  |
| H | 0.42887500  | -2.54660600 | -0.41701500 |
| C | -1.14880300 | -3.81939500 | 0.36369800  |
| O | -1.90410900 | -2.83140400 | 0.37182400  |
| O | 0.05652200  | -3.81758600 | -0.06656100 |
| C | -1.62942400 | -5.14246400 | 0.93457300  |
| H | -2.71102900 | -5.13554300 | 1.07170900  |
| H | -1.33172800 | -5.96568600 | 0.28220900  |

|   |             |             |            |
|---|-------------|-------------|------------|
| H | -1.14803100 | -5.30122800 | 1.90501000 |
|---|-------------|-------------|------------|

**M6R**

|   |             |             |             |
|---|-------------|-------------|-------------|
| C | -3.87071700 | -0.89091900 | -0.98143900 |
| C | -2.65631400 | -0.86262000 | -0.29827300 |
| C | -2.54999100 | -1.29988700 | 1.01497000  |
| C | -3.71833000 | -1.73291800 | 1.62442900  |
| C | -4.95514900 | -1.74377700 | 0.98383100  |
| C | -5.02998800 | -1.32481200 | -0.33831300 |
| C | -3.71494700 | -0.41772800 | -2.40039000 |
| C | -2.20355700 | -0.14374500 | -2.58938300 |
| C | -1.56084400 | -0.28284100 | -1.15945800 |
| H | -1.62078400 | -1.27992300 | 1.57113800  |
| H | -5.82992000 | -2.08746000 | 1.52231000  |
| H | -5.98028800 | -1.34118500 | -0.86244200 |
| H | -4.05888300 | -1.16279900 | -3.12622700 |
| H | -2.00053300 | 0.86779300  | -2.94122400 |
| H | -4.29414300 | 0.49423300  | -2.57358700 |
| H | -1.22621500 | 0.70302100  | -0.83010900 |
| N | -0.37992400 | -1.14334200 | -1.19617500 |
| O | -1.61574100 | -0.99028200 | -3.56559000 |
| C | 0.74475500  | -1.11433600 | -0.47655500 |
| C | -0.25320300 | -2.16870900 | -2.08601600 |
| N | 1.47722700  | -2.13913700 | -0.89550500 |
| N | 0.87534700  | -2.79745300 | -1.92413600 |
| C | -1.32493800 | -2.29869200 | -3.11885200 |
| H | -2.21070800 | -2.79749400 | -2.69841100 |
| H | -0.95983300 | -2.87623400 | -3.96836200 |
| C | 2.73686000  | -2.59459500 | -0.36058000 |
| C | 2.70186500  | -3.39041800 | 0.79172800  |
| C | 3.91117300  | -2.26516100 | -1.03955400 |
| C | 3.92436000  | -3.81327900 | 1.30409600  |
| C | 5.10723400  | -2.71678000 | -0.47774000 |
| C | 5.13404200  | -3.47462700 | 0.69150300  |
| H | 3.93177800  | -4.42895600 | 2.20006100  |
| H | 6.04067100  | -2.47128000 | -0.97780200 |
| C | 6.43920100  | -3.92376200 | 1.29225600  |
| C | 1.51071000  | 2.30025800  | 1.30040900  |
| C | 1.42700200  | 1.25169800  | 0.18651400  |
| H | 1.66932200  | 1.82535700  | 2.27308000  |
| C | 2.61791400  | 3.30277800  | 1.05442600  |
| C | 3.48961800  | 3.65979900  | 2.08206900  |
| C | 2.76104100  | 3.89163500  | -0.20683700 |
| C | 4.50577800  | 4.58413700  | 1.85294200  |

|   |             |             |             |
|---|-------------|-------------|-------------|
| H | 3.37332200  | 3.20915300  | 3.06423200  |
| C | 3.77581100  | 4.81552200  | -0.43306600 |
| H | 2.07246600  | 3.62357000  | -1.00675200 |
| C | 4.65046500  | 5.16234300  | 0.59519500  |
| H | 5.18277200  | 4.85157100  | 2.65816600  |
| H | 3.88303000  | 5.26667500  | -1.41440100 |
| H | 5.44154200  | 5.88372700  | 0.41627500  |
| C | 1.12634800  | -0.13899500 | 0.63390800  |
| O | 1.22062400  | -0.57696500 | 1.75650700  |
| N | -3.64291200 | -2.19777600 | 3.01495200  |
| O | -2.53796300 | -2.32653800 | 3.51028200  |
| O | -4.69075900 | -2.43268700 | 3.59247200  |
| H | 6.38627600  | -4.96697500 | 1.61541700  |
| H | 6.68602200  | -3.32096300 | 2.17248200  |
| H | 7.25998600  | -3.82544400 | 0.57852800  |
| C | 3.89509300  | -1.51680200 | -2.34307400 |
| H | 3.66967200  | -2.20967200 | -3.16202100 |
| H | 3.13615900  | -0.72988100 | -2.37960300 |
| H | 4.87701000  | -1.07992200 | -2.53739900 |
| C | 1.40126100  | -3.79373500 | 1.43209700  |
| H | 0.93192200  | -2.94596900 | 1.93901200  |
| H | 0.69714100  | -4.17758500 | 0.68664600  |
| H | 1.57079100  | -4.57836800 | 2.17138500  |
| H | 2.39328400  | 1.15236800  | -0.33440300 |
| C | -1.29011500 | 2.05947000  | 1.63347600  |
| S | -0.03687500 | 3.31379800  | 1.35932000  |
| N | -1.16231200 | 1.02703800  | 2.36603600  |
| H | -0.25594200 | 0.98575000  | 2.83613600  |
| C | -2.58267800 | 2.28822800  | 0.92661900  |
| C | -2.62249200 | 2.80922900  | -0.37157700 |
| C | -3.76640800 | 1.88014700  | 1.55289500  |
| C | -3.84534900 | 2.91707400  | -1.03215700 |
| H | -1.70075600 | 3.07676400  | -0.88367800 |
| C | -4.98273900 | 2.00558100  | 0.89323100  |
| H | -3.71175800 | 1.46841000  | 2.55594200  |
| C | -5.02368500 | 2.52497000  | -0.40123000 |
| H | -3.87191500 | 3.31139300  | -2.04368200 |
| H | -5.89924500 | 1.69779200  | 1.38712400  |
| H | -5.97494200 | 2.62340100  | -0.91611400 |
| H | 0.75262700  | 1.55454800  | -0.63269600 |
| C | 0.65663500  | 1.33346600  | -3.06879800 |
| O | -0.09219500 | 2.05222400  | -2.34618100 |
| O | 1.38803200  | 0.39578600  | -2.66346500 |
| C | 0.62000300  | 1.58820600  | -4.57500200 |

|   |             |            |             |
|---|-------------|------------|-------------|
| H | 0.27112500  | 2.59810900 | -4.79670400 |
| H | 1.60228800  | 1.41658800 | -5.01994000 |
| H | -0.07736300 | 0.86973500 | -5.02031900 |

**M6S**

|   |             |             |             |
|---|-------------|-------------|-------------|
| C | -5.42168000 | 0.49359000  | -0.43142000 |
| C | -4.03585800 | 0.62994400  | -0.53249000 |
| C | -3.45537900 | 1.72193700  | -1.16034500 |
| C | -4.32335200 | 2.67547700  | -1.67883900 |
| C | -5.70907700 | 2.56977900  | -1.59957800 |
| C | -6.26543400 | 1.46260300  | -0.96904400 |
| C | -5.78298500 | -0.78259200 | 0.28463600  |
| C | -4.46592400 | -1.27117000 | 0.92685600  |
| C | -3.34295600 | -0.55181700 | 0.10578300  |
| H | -2.38174500 | 1.83807500  | -1.25486800 |
| H | -6.32674000 | 3.35083800  | -2.02499800 |
| H | -7.34339600 | 1.36453300  | -0.89317100 |
| H | -6.55425000 | -0.64985900 | 1.04814900  |
| H | -4.32130000 | -2.34823200 | 0.84613700  |
| H | -6.15307300 | -1.52444300 | -0.43151100 |
| H | -2.92310500 | -1.24798400 | -0.61877100 |
| N | -2.25123600 | -0.14726900 | 0.98658500  |
| O | -4.43419200 | -1.00566100 | 2.32417800  |
| C | -0.92200000 | -0.25857700 | 0.84843700  |
| C | -2.49071800 | 0.26543700  | 2.26084600  |
| N | -0.40578600 | 0.13372900  | 2.01083700  |
| N | -1.37890500 | 0.45092900  | 2.91357600  |
| C | -3.91243800 | 0.24916400  | 2.71588200  |
| H | -4.47337500 | 1.08983700  | 2.28595700  |
| H | -3.96007600 | 0.30727000  | 3.80324600  |
| C | 0.97723700  | 0.25642000  | 2.40269700  |
| C | 1.58924600  | 1.50509400  | 2.28018900  |
| C | 1.60361100  | -0.87489800 | 2.93714400  |
| C | 2.92891900  | 1.58717100  | 2.66084600  |
| C | 2.94044700  | -0.73303100 | 3.30136500  |
| C | 3.61780100  | 0.48121900  | 3.15825700  |
| H | 3.44572200  | 2.53852700  | 2.55366400  |
| H | 3.46396000  | -1.59316500 | 3.71145300  |
| C | 5.07257600  | 0.58405400  | 3.53086200  |
| C | 1.74506200  | -1.31093200 | -1.84345800 |
| C | 1.02736700  | -1.36385000 | -0.48442500 |
| H | 1.10056900  | -0.82041300 | -2.57932000 |
| C | 2.14454600  | -2.65493600 | -2.42698000 |
| C | 2.30766000  | -2.75690000 | -3.81251200 |

|   |              |              |              |
|---|--------------|--------------|--------------|
| C | 2. 38985700  | -3. 77374600 | -1. 62973700 |
| C | 2. 70073400  | -3. 95592200 | -4. 39465000 |
| H | 2. 12212100  | -1. 88556900 | -4. 43613700 |
| C | 2. 77937900  | -4. 97675000 | -2. 21564300 |
| H | 2. 24221100  | -3. 73163700 | -0. 55593300 |
| C | 2. 93823800  | -5. 07178500 | -3. 59417700 |
| H | 2. 81709400  | -4. 02049700 | -5. 47187200 |
| H | 2. 95142100  | -5. 84330300 | -1. 58537700 |
| H | 3. 23983900  | -6. 01180600 | -4. 04546800 |
| C | -0. 27362700 | -0. 62725000 | -0. 47074600 |
| O | -0. 89595400 | -0. 28525300 | -1. 45544600 |
| N | -3. 74913700 | 3. 85522200  | -2. 34185700 |
| O | -2. 53571500 | 3. 94954300  | -2. 37666000 |
| O | -4. 51995600 | 4. 67122300  | -2. 81556400 |
| H | 5. 26268200  | 0. 12161100  | 4. 50364500  |
| H | 5. 39935800  | 1. 62535400  | 3. 57179000  |
| H | 5. 69560700  | 0. 06392800  | 2. 79509400  |
| C | 0. 86994200  | -2. 17808300 | 3. 08657800  |
| H | -0. 11735700 | -2. 02692400 | 3. 53394000  |
| H | 0. 71682500  | -2. 68378600 | 2. 12378200  |
| H | 1. 43606900  | -2. 85382000 | 3. 73068700  |
| C | 0. 84273600  | 2. 70499200  | 1. 76510400  |
| H | 0. 67387200  | 2. 62463800  | 0. 68517600  |
| H | -0. 12485000 | 2. 81186700  | 2. 26530300  |
| H | 1. 42238400  | 3. 61229000  | 1. 94599800  |
| H | 1. 66614000  | -1. 01138400 | 0. 33050000  |
| C | 2. 71312600  | 1. 25209400  | -1. 19381200 |
| S | 3. 31447500  | -0. 34507000 | -1. 73628100 |
| N | 1. 52488100  | 1. 68480100  | -1. 34153400 |
| H | 0. 93314700  | 1. 05734400  | -1. 88428400 |
| C | 3. 72915700  | 2. 11895200  | -0. 52543600 |
| C | 4. 92709400  | 1. 61547300  | -0. 00972500 |
| C | 3. 44731100  | 3. 48453500  | -0. 39416600 |
| C | 5. 82711100  | 2. 46456900  | 0. 62922500  |
| H | 5. 15113300  | 0. 55623400  | -0. 08269600 |
| C | 4. 34122700  | 4. 32656800  | 0. 25593000  |
| H | 2. 52130100  | 3. 86698500  | -0. 81011700 |
| C | 5. 53479200  | 3. 81854700  | 0. 76956900  |
| H | 6. 75479600  | 2. 06326500  | 1. 02482400  |
| H | 4. 11303400  | 5. 38336100  | 0. 35244000  |
| H | 6. 23679100  | 4. 47837600  | 1. 26984700  |
| H | 0. 73949000  | -2. 39871300 | -0. 21377400 |
| C | -1. 10269500 | -3. 85585400 | 0. 54109600  |
| O | -1. 59274900 | -2. 68579400 | 0. 54677500  |



|   |             |             |             |
|---|-------------|-------------|-------------|
| O | 0.11471800  | -4.13714000 | 0.54728600  |
| C | -2.11358100 | -5.00245000 | 0.53738600  |
| H | -2.78233500 | -4.89877300 | -0.32212800 |
| H | -1.61405100 | -5.97088700 | 0.49880100  |
| H | -2.72979200 | -4.94439400 | 1.43986200  |

**TS7R**

|   |             |             |             |
|---|-------------|-------------|-------------|
| C | -4.92558100 | 1.02351500  | 0.47085800  |
| C | -3.75770500 | 0.26458600  | 0.54302300  |
| C | -3.76811200 | -1.04404900 | 1.00579100  |
| C | -5.00137000 | -1.56159800 | 1.37945200  |
| C | -6.18678000 | -0.83272900 | 1.31924500  |
| C | -6.14726400 | 0.47799000  | 0.86090700  |
| C | -4.63924800 | 2.41068400  | -0.03881900 |
| C | -3.18067600 | 2.36899000  | -0.54978300 |
| C | -2.56271600 | 1.06598100  | 0.07776100  |
| H | -2.85863900 | -1.62805900 | 1.09134500  |
| H | -7.11421600 | -1.29877200 | 1.62839500  |
| H | -7.05980000 | 1.06288000  | 0.80709700  |
| H | -5.31243300 | 2.72369700  | -0.84254200 |
| H | -2.60367500 | 3.23274600  | -0.22014900 |
| H | -4.73925000 | 3.14101100  | 0.77109800  |
| H | -1.87565500 | 1.31321200  | 0.88903800  |
| N | -1.77347200 | 0.35145800  | -0.92021300 |
| O | -3.11538900 | 2.42781100  | -1.96794700 |
| C | -0.59740500 | -0.28219100 | -0.79343700 |
| C | -2.08835900 | 0.36634000  | -2.24789300 |
| N | -0.26816900 | -0.65989500 | -2.02776600 |
| N | -1.18460400 | -0.24287600 | -2.95673400 |
| C | -3.26451800 | 1.19432500  | -2.64443300 |
| H | -4.20694900 | 0.69011400  | -2.38891700 |
| H | -3.24556300 | 1.39380500  | -3.71600000 |
| C | 0.89617600  | -1.39539300 | -2.43941300 |
| C | 0.90877000  | -2.77875100 | -2.26110900 |
| C | 1.96990700  | -0.66841500 | -2.95927500 |
| C | 2.07691200  | -3.45148100 | -2.61780000 |
| C | 3.11233000  | -1.38837600 | -3.30123300 |
| C | 3.18469600  | -2.77362600 | -3.12978300 |
| H | 2.12179900  | -4.52981200 | -2.48816200 |
| H | 3.97027000  | -0.85331000 | -3.70062900 |
| C | 4.45178800  | -3.51674300 | -3.46009500 |
| C | 2.18963800  | -0.34790800 | 1.83919200  |
| C | 1.53046200  | -0.89214400 | 0.56397900  |
| H | 1.42552100  | -0.30526000 | 2.62081300  |

|   |              |              |              |
|---|--------------|--------------|--------------|
| C | 3. 33372200  | -1. 21311300 | 2. 31979000  |
| C | 3. 50454800  | -1. 44660100 | 3. 68538400  |
| C | 4. 24228200  | -1. 77831500 | 1. 41921600  |
| C | 4. 55431600  | -2. 23698900 | 4. 14499800  |
| H | 2. 80446200  | -1. 00620000 | 4. 39054600  |
| C | 5. 29051200  | -2. 57017900 | 1. 87662700  |
| H | 4. 12903700  | -1. 59415500 | 0. 35340300  |
| C | 5. 44925000  | -2. 80297200 | 3. 24117100  |
| H | 4. 67085300  | -2. 41307500 | 5. 20993900  |
| H | 5. 98749200  | -3. 00444900 | 1. 16612200  |
| H | 6. 26717400  | -3. 42171500 | 3. 59692200  |
| C | 0. 06793900  | -0. 53392800 | 0. 53375700  |
| O | -0. 69200800 | -0. 75092400 | 1. 47672600  |
| N | -5. 05917500 | -2. 94841300 | 1. 86301600  |
| O | -4. 02811400 | -3. 59605400 | 1. 85187000  |
| O | -6. 13660400 | -3. 37206900 | 2. 24363400  |
| H | 5. 12683800  | -3. 52328800 | -2. 59726300 |
| H | 4. 98268900  | -3. 04505000 | -4. 29039700 |
| H | 4. 24553800  | -4. 55600500 | -3. 72621900 |
| C | 1. 88922500  | 0. 82730300  | -3. 09404700 |
| H | 1. 13562500  | 1. 11305200  | -3. 83501800 |
| H | 1. 60327800  | 1. 29512100  | -2. 14358400 |
| H | 2. 85158400  | 1. 23732500  | -3. 40446900 |
| C | -0. 28069100 | -3. 50078600 | -1. 68715900 |
| H | -0. 41743400 | -3. 27122100 | -0. 62377400 |
| H | -1. 20227000 | -3. 22033600 | -2. 20683900 |
| H | -0. 15272200 | -4. 58078200 | -1. 77682700 |
| H | 1. 59127600  | -1. 98958400 | 0. 57913700  |
| C | 1. 46373000  | 2. 21848400  | 0. 70620500  |
| S | 2. 86972600  | 1. 33513600  | 1. 61007900  |
| N | 0. 41493300  | 1. 71609600  | 0. 27651100  |
| H | 2. 05077100  | -0. 53403800 | -0. 32553800 |
| C | 1. 80044600  | 3. 68359300  | 0. 59112100  |
| C | 3. 10912200  | 4. 15729000  | 0. 46842300  |
| C | 0. 74520200  | 4. 60022400  | 0. 57111900  |
| C | 3. 35433100  | 5. 52163500  | 0. 32859800  |
| H | 3. 94187000  | 3. 46050200  | 0. 46547900  |
| C | 0. 99013900  | 5. 96172800  | 0. 44331400  |
| H | -0. 26592500 | 4. 21679600  | 0. 66111900  |
| C | 2. 29839800  | 6. 42763800  | 0. 31972600  |
| H | 4. 37553300  | 5. 87568400  | 0. 22555900  |
| H | 0. 16064700  | 6. 66266300  | 0. 44077100  |
| H | 2. 49220000  | 7. 49095700  | 0. 21713500  |

**TS7S**

|   |             |             |             |
|---|-------------|-------------|-------------|
| C | -5.06575500 | -1.23285100 | -0.71905200 |
| C | -3.70164200 | -0.95871400 | -0.80021200 |
| C | -3.22193500 | 0.27397000  | -1.22960400 |
| C | -4.18423900 | 1.21677200  | -1.56792200 |
| C | -5.55557500 | 0.98072600  | -1.49512600 |
| C | -6.00289900 | -0.26213000 | -1.06800300 |
| C | -5.31589200 | -2.63730600 | -0.24001800 |
| C | -3.93256300 | -3.18497800 | 0.18511500  |
| C | -2.88286100 | -2.15900800 | -0.38410100 |
| H | -2.15829400 | 0.50156100  | -1.28079100 |
| H | -6.24528100 | 1.76809500  | -1.77254700 |
| H | -7.06673000 | -0.46779800 | -1.00625300 |
| H | -6.01423400 | -2.68483700 | 0.60191900  |
| H | -3.74632000 | -4.16882000 | -0.24634700 |
| H | -5.73971800 | -3.24911600 | -1.04276400 |
| H | -2.33123600 | -2.57019700 | -1.22608200 |
| N | -1.89257100 | -1.79915700 | 0.64238200  |
| O | -3.84242400 | -3.39651800 | 1.58441500  |
| C | -0.60175600 | -1.41708200 | 0.54988800  |
| C | -2.24406500 | -1.75173200 | 1.96367800  |
| N | -0.22726800 | -1.18123100 | 1.81486800  |
| N | -1.24237000 | -1.39167600 | 2.70404300  |
| C | -3.61053800 | -2.22122500 | 2.33514400  |
| H | -4.36049200 | -1.44413900 | 2.12946300  |
| H | -3.64739000 | -2.47858000 | 3.39395700  |
| C | 1.03396800  | -0.71114800 | 2.32968900  |
| C | 1.13502500  | 0.63110700  | 2.71138300  |
| C | 2.06851100  | -1.63592600 | 2.49711700  |
| C | 2.38321900  | 1.06464900  | 3.15734300  |
| C | 3.29233900  | -1.14991600 | 2.95433500  |
| C | 3.47386600  | 0.19992000  | 3.26050200  |
| H | 2.49933300  | 2.10973500  | 3.43487300  |
| H | 4.11824400  | -1.84555800 | 3.08025800  |
| C | 4.81926500  | 0.71805400  | 3.69230400  |
| C | 2.22493100  | -0.59305900 | -1.96125700 |
| C | 1.59793000  | -1.44731100 | -0.85462300 |
| H | 1.49698400  | -0.50334500 | -2.77322300 |
| C | 3.50751100  | -1.18621600 | -2.49822100 |
| C | 3.71494100  | -1.28016300 | -3.87483800 |
| C | 4.50429200  | -1.64554300 | -1.63095700 |
| C | 4.89049300  | -1.83102000 | -4.37908000 |
| H | 2.94689200  | -0.91902800 | -4.55350800 |
| C | 5.67763900  | -2.19837800 | -2.13289200 |

|   |             |             |             |
|---|-------------|-------------|-------------|
| H | 4.36058700  | -1.55978000 | -0.55610600 |
| C | 5.87397800  | -2.29304000 | -3.50946600 |
| H | 5.03688200  | -1.89898800 | -5.45270700 |
| H | 6.44265200  | -2.55324900 | -1.44897600 |
| H | 6.79079000  | -2.72243000 | -3.90122700 |
| C | 0.10086500  | -1.23529100 | -0.80194100 |
| O | -0.59560500 | -1.49568300 | -1.79541200 |
| N | -3.73768600 | 2.53608900  | -2.03691700 |
| O | -2.54846700 | 2.69034200  | -2.24712900 |
| O | -4.58390400 | 3.40001000  | -2.19273000 |
| H | 5.34168000  | 1.17244300  | 2.84345500  |
| H | 5.45052500  | -0.08463000 | 4.08069200  |
| H | 4.71954900  | 1.48447800  | 4.46522900  |
| C | 1.86605600  | -3.09963400 | 2.20752400  |
| H | 2.71775800  | -3.67869100 | 2.56916200  |
| H | 0.96347200  | -3.47454100 | 2.70048300  |
| H | 1.76287800  | -3.29608400 | 1.13527200  |
| C | -0.05485500 | 1.55047800  | 2.70905600  |
| H | 0.26789800  | 2.58921500  | 2.81173500  |
| H | -0.62216500 | 1.45506900  | 1.77930300  |
| H | -0.71225000 | 1.30602700  | 3.55092400  |
| H | 1.74218800  | -2.50527500 | -1.11135200 |
| C | 1.01754400  | 1.53377700  | -0.53791400 |
| S | 2.61543600  | 1.08486000  | -1.35410100 |
| N | 0.01566400  | 0.80940600  | -0.36970700 |
| H | 2.09026500  | -1.24471200 | 0.09585900  |
| C | 1.06260100  | 2.95767400  | -0.05580800 |
| C | 2.21003900  | 3.49854700  | 0.53041600  |
| C | -0.10423700 | 3.72555600  | -0.11421500 |
| C | 2.18689500  | 4.78784300  | 1.05932100  |
| H | 3.11704700  | 2.90371000  | 0.59233000  |
| C | -0.12022500 | 5.01649000  | 0.40079600  |
| H | -0.98871100 | 3.29085200  | -0.56961800 |
| C | 1.02349900  | 5.54965200  | 0.99497100  |
| H | 3.08091800  | 5.19628900  | 1.52105700  |
| H | -1.02777400 | 5.60964000  | 0.33976400  |
| H | 1.00787000  | 6.55642400  | 1.40126800  |

### M7R

|   |            |             |             |
|---|------------|-------------|-------------|
| C | 4.39830900 | -4.35046700 | -6.22342500 |
| C | 4.15487900 | -3.06264300 | -5.74711200 |
| C | 4.63401200 | -1.92669200 | -6.39368700 |
| C | 5.37481100 | -2.15922400 | -7.54733500 |
| C | 5.64776400 | -3.42993900 | -8.04862700 |

|   |              |              |              |
|---|--------------|--------------|--------------|
| C | 5. 15147000  | -4. 54168700 | -7. 37946800 |
| C | 3. 75898900  | -5. 38785900 | -5. 33888800 |
| C | 2. 84716300  | -4. 59884700 | -4. 36863900 |
| C | 3. 32744800  | -3. 10767000 | -4. 48219300 |
| H | 4. 43163200  | -0. 91640600 | -6. 01615500 |
| H | 6. 23137600  | -3. 52820200 | -8. 95565200 |
| H | 5. 34286300  | -5. 53927000 | -7. 76191500 |
| H | 3. 17126900  | -6. 12622800 | -5. 89334800 |
| H | 2. 96547000  | -4. 94481400 | -3. 34144700 |
| H | 4. 52311300  | -5. 93748700 | -4. 77902700 |
| H | 3. 91572600  | -2. 81378400 | -3. 61442100 |
| N | 2. 18964000  | -2. 18274600 | -4. 55927500 |
| O | 1. 46819700  | -4. 79090000 | -4. 64437500 |
| C | 2. 03126700  | -0. 89144800 | -4. 17975800 |
| C | 1. 05092100  | -2. 56750700 | -5. 21634000 |
| N | 0. 80116500  | -0. 57597300 | -4. 60628300 |
| N | 0. 17634700  | -1. 61286100 | -5. 24661600 |
| C | 0. 95893400  | -3. 98110300 | -5. 68474000 |
| H | 1. 51446400  | -4. 11695700 | -6. 62374700 |
| H | -0. 08352700 | -4. 25499100 | -5. 85011800 |
| C | 0. 09872200  | 0. 67903500  | -4. 52932800 |
| C | 0. 26741200  | 1. 59237100  | -5. 57075000 |
| C | -0. 74645300 | 0. 90090300  | -3. 43788900 |
| C | -0. 41332000 | 2. 80658300  | -5. 46149100 |
| C | -1. 40351600 | 2. 12561400  | -3. 37950200 |
| C | -1. 23743400 | 3. 09380700  | -4. 37488500 |
| H | -0. 29141300 | 3. 54476800  | -6. 24983100 |
| H | -2. 05726900 | 2. 33364000  | -2. 53565000 |
| C | -1. 94942300 | 4. 41597500  | -4. 26687300 |
| C | 3. 76693700  | 2. 20090400  | -2. 56448900 |
| C | 2. 66076300  | 1. 16847000  | -2. 74717100 |
| H | 4. 05605300  | 2. 52389700  | -3. 56769700 |
| C | 3. 34706500  | 3. 39250200  | -1. 73700200 |
| C | 3. 31326600  | 4. 65915100  | -2. 32114800 |
| C | 2. 95236300  | 3. 25221300  | -0. 40273400 |
| C | 2. 89030500  | 5. 76687100  | -1. 58966900 |
| H | 3. 61970200  | 4. 77440700  | -3. 35729000 |
| C | 2. 52971100  | 4. 35624600  | 0. 32887800  |
| H | 2. 98958300  | 2. 27160100  | 0. 06515200  |
| C | 2. 49780400  | 5. 61799700  | -0. 26330800 |
| H | 2. 87129400  | 6. 74643300  | -2. 05748000 |
| H | 2. 22808400  | 4. 23407700  | 1. 36470900  |
| H | 2. 17257400  | 6. 48074600  | 0. 30974500  |
| C | 3. 17203600  | 0. 11347900  | -3. 75777800 |

|   |             |             |             |
|---|-------------|-------------|-------------|
| O | 3.62167800  | 0.60955300  | -4.88771800 |
| N | 5.88879000  | -1.00129400 | -8.29650500 |
| O | 5.52576200  | 0.10468400  | -7.94799900 |
| O | 6.64510400  | -1.22059200 | -9.22950600 |
| H | -1.63658900 | 4.95292400  | -3.36603100 |
| H | -3.03264600 | 4.27369600  | -4.20395700 |
| H | -1.73926900 | 5.05177800  | -5.12949400 |
| C | -0.90906400 | -0.13460300 | -2.35870000 |
| H | -1.09994700 | -1.12495300 | -2.78250700 |
| H | -0.00658100 | -0.20536900 | -1.74153200 |
| H | -1.74205600 | 0.12446600  | -1.70256300 |
| C | 1.15283700  | 1.27576300  | -6.74240100 |
| H | 2.18494800  | 1.13987400  | -6.39579400 |
| H | 0.83036500  | 0.34911800  | -7.22990300 |
| H | 1.11574500  | 2.08010400  | -7.47963800 |
| H | 1.80543900  | 1.70303200  | -3.16327500 |
| C | 5.07916300  | -0.26484300 | -2.34736900 |
| S | 5.25620200  | 1.42854600  | -1.81669200 |
| N | 4.17498200  | -0.76080600 | -3.08462300 |
| H | 2.36890600  | 0.71537500  | -1.79127400 |
| C | 6.17156000  | -1.15364300 | -1.84908000 |
| C | 6.71730800  | -1.01989900 | -0.56995500 |
| C | 6.65446700  | -2.15203100 | -2.70166900 |
| C | 7.72246100  | -1.88459500 | -0.14561500 |
| H | 6.34625000  | -0.25033400 | 0.10009900  |
| C | 7.66278000  | -3.00910300 | -2.27720700 |
| H | 6.24284600  | -2.22491900 | -3.70465400 |
| C | 8.19673900  | -2.87939500 | -0.99602700 |
| H | 8.13528300  | -1.77936200 | 0.85264000  |
| H | 8.04158200  | -3.77178800 | -2.95051800 |
| H | 8.98559000  | -3.54730500 | -0.66450200 |

### M7S

|   |            |             |             |
|---|------------|-------------|-------------|
| C | 3.71393700 | -3.58063200 | -4.94913200 |
| C | 3.34418600 | -2.30816800 | -4.52010700 |
| C | 3.39487100 | -1.20390500 | -5.36314900 |
| C | 3.80708700 | -1.44563600 | -6.66609100 |
| C | 4.18795100 | -2.70374400 | -7.13094700 |
| C | 4.14576500 | -3.78404400 | -6.25997400 |
| C | 3.58378700 | -4.59090800 | -3.84115500 |
| C | 2.90568100 | -3.83890400 | -2.66786700 |
| C | 2.89018900 | -2.32011400 | -3.07885500 |
| H | 3.15628400 | -0.20812000 | -4.99477300 |
| H | 4.50574200 | -2.81602500 | -8.16008700 |

|   |             |             |             |
|---|-------------|-------------|-------------|
| H | 4.43880200  | -4.77136100 | -6.60239300 |
| H | 2.98714500  | -5.46339800 | -4.12747600 |
| H | 3.47463300  | -3.95339500 | -1.74508200 |
| H | 4.56683200  | -4.96473800 | -3.53862700 |
| H | 3.52062500  | -1.68298700 | -2.46012700 |
| N | 1.52757000  | -1.76935700 | -2.97298700 |
| O | 1.62746600  | -4.36932600 | -2.35239600 |
| C | 1.11512700  | -0.49506100 | -2.85004300 |
| C | 0.41754300  | -2.54628100 | -3.16708700 |
| N | -0.21436600 | -0.55659200 | -2.97037200 |
| N | -0.66790000 | -1.83354800 | -3.15958400 |
| C | 0.61687400  | -4.02173000 | -3.27585900 |
| H | 0.88715800  | -4.30111200 | -4.30445600 |
| H | -0.29609000 | -4.54998000 | -2.99876000 |
| C | -1.13661400 | 0.55012500  | -2.98949700 |
| C | -1.37865700 | 1.17818600  | -4.21720500 |
| C | -1.74712300 | 0.93622400  | -1.79697100 |
| C | -2.19373700 | 2.30523400  | -4.20129800 |
| C | -2.56187400 | 2.07033100  | -1.83683200 |
| C | -2.77357600 | 2.77680700  | -3.01963600 |
| H | -2.37010900 | 2.83568100  | -5.13444600 |
| H | -3.03974100 | 2.40496600  | -0.91952100 |
| C | -3.61454100 | 4.02541300  | -3.04194400 |
| C | 2.69018900  | 2.47236200  | -0.94821100 |
| C | 1.77018200  | 1.28927200  | -1.20924900 |
| H | 3.70607800  | 2.14774000  | -1.18772400 |
| C | 2.62107500  | 2.98794800  | 0.46939400  |
| C | 3.76580900  | 2.99029900  | 1.26759200  |
| C | 1.41561700  | 3.44391300  | 1.01436600  |
| C | 3.71015000  | 3.43301100  | 2.58765500  |
| H | 4.70594400  | 2.64087100  | 0.84917200  |
| C | 1.35842200  | 3.88603600  | 2.33081300  |
| H | 0.52139800  | 3.45932500  | 0.39563800  |
| C | 2.50689300  | 3.88222200  | 3.12209100  |
| H | 4.60962200  | 3.43023800  | 3.19549700  |
| H | 0.41744100  | 4.24015500  | 2.74068800  |
| H | 2.46199600  | 4.23075000  | 4.14914500  |
| C | 2.08477000  | 0.73536500  | -2.62596500 |
| O | 3.32959100  | 0.37607900  | -2.79019000 |
| N | 3.83678300  | -0.32118900 | -7.61202900 |
| O | 3.38264100  | 0.74642500  | -7.24137100 |
| O | 4.30433400  | -0.52208800 | -8.71982500 |
| H | -3.00472600 | 4.89346900  | -3.31235500 |
| H | -4.06938100 | 4.21946100  | -2.06809800 |

|   |             |             |             |
|---|-------------|-------------|-------------|
| H | -4.41439400 | 3.94723400  | -3.78426200 |
| C | -1.57410300 | 0.13886800  | -0.53197100 |
| H | -2.08228800 | -0.82738200 | -0.61838100 |
| H | -0.52344200 | -0.06634300 | -0.31004000 |
| H | -2.00037100 | 0.67222300  | 0.31994500  |
| C | -0.79099100 | 0.64458600  | -5.49323200 |
| H | -1.14356900 | 1.22486800  | -6.34807000 |
| H | 0.30059300  | 0.70415300  | -5.45963100 |
| H | -1.07868600 | -0.40189600 | -5.64283000 |
| H | 2.00389400  | 0.50739300  | -0.47729400 |
| C | 1.66045300  | 2.93231600  | -3.52148400 |
| S | 2.26593000  | 3.84012000  | -2.10168200 |
| N | 1.59884700  | 1.67705100  | -3.67574300 |
| H | 0.72193700  | 1.58767400  | -1.09779900 |
| C | 1.16999000  | 3.81304000  | -4.62360300 |
| C | 0.46683100  | 4.99265400  | -4.36295200 |
| C | 1.36820700  | 3.40714000  | -5.94710700 |
| C | -0.03980900 | 5.75152700  | -5.41471200 |
| H | 0.29534400  | 5.30620300  | -3.33743900 |
| C | 0.86748500  | 4.17222800  | -6.99426100 |
| H | 1.92726300  | 2.49644500  | -6.13796300 |
| C | 0.15888800  | 5.34375100  | -6.73094000 |
| H | -0.59208800 | 6.66199600  | -5.20303700 |
| H | 1.03781200  | 3.85586900  | -8.01878900 |
| H | -0.23185400 | 5.93964400  | -7.55012900 |

**TS8R**

|   |            |             |             |
|---|------------|-------------|-------------|
| C | 4.10639300 | -4.62176800 | -5.89820400 |
| C | 3.83456900 | -3.29988400 | -5.54356200 |
| C | 4.29719500 | -2.22733800 | -6.29943200 |
| C | 5.04403600 | -2.55265100 | -7.42732200 |
| C | 5.33095100 | -3.85987000 | -7.81238900 |
| C | 4.85676300 | -4.90961700 | -7.03605400 |
| C | 3.49817700 | -5.58207900 | -4.91054800 |
| C | 2.53913400 | -4.72653200 | -4.05292800 |
| C | 3.01109100 | -3.24496400 | -4.27300600 |
| H | 4.09467900 | -1.18827000 | -6.03254900 |
| H | 5.91334300 | -4.03475400 | -8.70839300 |
| H | 5.06536800 | -5.93622600 | -7.32018200 |
| H | 2.95354900 | -6.40441600 | -5.38348500 |
| H | 2.60610200 | -4.98732000 | -2.99578700 |
| H | 4.27802300 | -6.02497700 | -4.28109300 |
| H | 3.62160900 | -2.89504900 | -3.43914400 |
| N | 1.86922900 | -2.34554900 | -4.38900100 |



|   |              |              |              |
|---|--------------|--------------|--------------|
| O | 1. 17753200  | -4. 95666100 | -4. 38696700 |
| C | 1. 70737700  | -1. 06140300 | -3. 97394900 |
| C | 0. 73508000  | -2. 75958100 | -5. 03907500 |
| N | 0. 46819600  | -0. 78595400 | -4. 40582000 |
| N | -0. 15997100 | -1. 82268800 | -5. 05757200 |
| C | 0. 67423800  | -4. 18756800 | -5. 46617300 |
| H | 1. 24900100  | -4. 34912400 | -6. 38896100 |
| H | -0. 35894700 | -4. 49116700 | -5. 63764100 |
| C | -0. 21180800 | 0. 47109400  | -4. 27781900 |
| C | -0. 20995900 | 1. 33799600  | -5. 37404400 |
| C | -0. 83728700 | 0. 77520800  | -3. 06685300 |
| C | -0. 84486900 | 2. 56932500  | -5. 21496700 |
| C | -1. 45367400 | 2. 02070500  | -2. 95579800 |
| C | -1. 45993100 | 2. 92969400  | -4. 01489200 |
| H | -0. 85328700 | 3. 26571100  | -6. 05000600 |
| H | -1. 94293000 | 2. 28530300  | -2. 02144400 |
| C | -2. 09149400 | 4. 28748500  | -3. 85470800 |
| C | 3. 81498800  | 2. 27090100  | -2. 59097300 |
| C | 2. 68087700  | 1. 29074700  | -2. 89368200 |
| H | 4. 18797600  | 2. 66214900  | -3. 54132800 |
| C | 3. 39203200  | 3. 42386300  | -1. 71093500 |
| C | 3. 41741800  | 4. 72357400  | -2. 21770000 |
| C | 2. 93296000  | 3. 21218800  | -0. 40740400 |
| C | 2. 98954000  | 5. 79593300  | -1. 43833500 |
| H | 3. 77423500  | 4. 89373800  | -3. 22990800 |
| C | 2. 50667600  | 4. 28196500  | 0. 37179600  |
| H | 2. 91925000  | 2. 20425700  | -0. 00042000 |
| C | 2. 53377100  | 5. 57746200  | -0. 14223400 |
| H | 3. 01738500  | 6. 80210800  | -1. 84472800 |
| H | 2. 15508500  | 4. 10582000  | 1. 38368500  |
| H | 2. 20516300  | 6. 41273900  | 0. 46814100  |
| C | 3. 20632000  | 0. 27709300  | -3. 90333500 |
| O | 3. 34101400  | 0. 60916000  | -5. 09330300 |
| N | 5. 56053400  | -1. 45908900 | -8. 26542600 |
| O | 5. 29048400  | -0. 31966200 | -7. 93973100 |
| O | 6. 23120700  | -1. 75993800 | -9. 23996600 |
| H | -1. 35841500 | 5. 01023900  | -3. 48049000 |
| H | -2. 91891100 | 4. 25940300  | -3. 14136100 |
| H | -2. 47054300 | 4. 66487900  | -4. 80755700 |
| C | -0. 83021000 | -0. 20513500 | -1. 92525600 |
| H | -1. 18059900 | -1. 18992400 | -2. 24966300 |
| H | 0. 17874900  | -0. 33718200 | -1. 52058700 |
| H | -1. 47662700 | 0. 14143500  | -1. 11665500 |
| C | 0. 46929200  | 0. 95183900  | -6. 65828200 |

|   |             |              |              |
|---|-------------|--------------|--------------|
| H | 1. 53503200 | 0. 77341400  | -6. 47832500 |
| H | 0. 03367800 | 0. 03633100  | -7. 07119700 |
| H | 0. 36735400 | 1. 74634700  | -7. 40026300 |
| H | 1. 85800900 | 1. 84503400  | -3. 35188900 |
| C | 5. 06084400 | -0. 24629400 | -2. 52190700 |
| S | 5. 21498500 | 1. 37931600  | -1. 79362900 |
| N | 4. 20297600 | -0. 63962900 | -3. 37219000 |
| H | 2. 33069800 | 0. 80707700  | -1. 97645800 |
| C | 6. 10314200 | -1. 20881500 | -2. 05532100 |
| C | 6. 63521100 | -1. 15735500 | -0. 76457500 |
| C | 6. 53986400 | -2. 20038200 | -2. 94086200 |
| C | 7. 58667000 | -2. 09037500 | -0. 36341400 |
| H | 6. 29391300 | -0. 40119100 | -0. 06423900 |
| C | 7. 49531900 | -3. 12569800 | -2. 53853800 |
| H | 6. 13221000 | -2. 21670200 | -3. 94747600 |
| C | 8. 01973900 | -3. 07407200 | -1. 24793900 |
| H | 7. 98831300 | -2. 04761100 | 0. 64387000  |
| H | 7. 83972100 | -3. 88278500 | -3. 23624500 |
| H | 8. 76728900 | -3. 79573000 | -0. 93364900 |

**TS8S**

|   |              |              |              |
|---|--------------|--------------|--------------|
| C | 3. 54910000  | -3. 74097500 | -5. 11575400 |
| C | 3. 18038700  | -2. 47197400 | -4. 67109100 |
| C | 3. 33352500  | -1. 34378300 | -5. 46876800 |
| C | 3. 85247000  | -1. 55784300 | -6. 74081600 |
| C | 4. 22301000  | -2. 81323500 | -7. 21952000 |
| C | 4. 07379200  | -3. 91901500 | -6. 39484000 |
| C | 3. 31784800  | -4. 77985100 | -4. 05185300 |
| C | 2. 51538800  | -4. 06133100 | -2. 94177500 |
| C | 2. 63633000  | -2. 52461400 | -3. 25948700 |
| H | 3. 08216100  | -0. 34734500 | -5. 11050700 |
| H | 4. 62203600  | -2. 90238900 | -8. 22199300 |
| H | 4. 36130900  | -4. 90472600 | -6. 74635300 |
| H | 2. 76506300  | -5. 65274000 | -4. 41338400 |
| H | 2. 92836800  | -4. 26743300 | -1. 95397500 |
| H | 4. 27389900  | -5. 14289700 | -3. 66033600 |
| H | 3. 30260300  | -2. 00541200 | -2. 56908100 |
| N | 1. 32943200  | -1. 88148800 | -3. 15903500 |
| O | 1. 17665400  | -4. 52793600 | -2. 86386100 |
| C | 1. 02552300  | -0. 61974700 | -2. 78240000 |
| C | 0. 18084700  | -2. 53204200 | -3. 53040300 |
| N | -0. 30126400 | -0. 58077900 | -2. 95225800 |
| N | -0. 85306900 | -1. 75776700 | -3. 40640200 |
| C | 0. 29990900  | -3. 98783000 | -3. 83865900 |

|   |             |             |             |
|---|-------------|-------------|-------------|
| H | 0.67268700  | -4.15153400 | -4.85974900 |
| H | -0.66539400 | -4.48385300 | -3.73333900 |
| C | -1.12270100 | 0.57904600  | -2.74747500 |
| C | -1.40127800 | 1.39602300  | -3.84668100 |
| C | -1.58816200 | 0.85351600  | -1.45864700 |
| C | -2.13183700 | 2.56024100  | -3.61035600 |
| C | -2.31252900 | 2.03054300  | -1.27340800 |
| C | -2.57867300 | 2.90063700  | -2.33301300 |
| H | -2.34740000 | 3.21902200  | -4.44837200 |
| H | -2.68197500 | 2.26990500  | -0.27867800 |
| C | -3.31722500 | 4.19181900  | -2.09959200 |
| C | 2.65968100  | 2.69094600  | -0.97192100 |
| C | 2.02740300  | 1.31989000  | -1.19262700 |
| H | 3.73728200  | 2.62299400  | -1.14713000 |
| C | 2.40883500  | 3.24320200  | 0.41201200  |
| C | 3.48226700  | 3.61172600  | 1.22327500  |
| C | 1.10680600  | 3.36616500  | 0.90982200  |
| C | 3.26404900  | 4.08557800  | 2.51513800  |
| H | 4.49511900  | 3.52234600  | 0.83971500  |
| C | 0.88865900  | 3.83771300  | 2.19915200  |
| H | 0.26182700  | 3.09756700  | 0.27904900  |
| C | 1.96729700  | 4.19812100  | 3.00607300  |
| H | 4.10905100  | 4.36713400  | 3.13555500  |
| H | -0.12544400 | 3.92830400  | 2.57602900  |
| H | 1.79542600  | 4.56782700  | 4.01210600  |
| C | 2.45143700  | 0.76974300  | -2.55135500 |
| O | 3.54931900  | 0.20255200  | -2.67794100 |
| N | 4.03349000  | -0.40678500 | -7.63594300 |
| O | 3.70795400  | 0.69296300  | -7.22566100 |
| O | 4.49802600  | -0.61377600 | -8.74346600 |
| H | -2.61976600 | 4.98963600  | -1.82114000 |
| H | -4.04573200 | 4.09497700  | -1.29049400 |
| H | -3.84530900 | 4.51459900  | -3.00017700 |
| C | -1.31487100 | -0.08858900 | -0.31676900 |
| H | -1.55668900 | -1.11946000 | -0.59253800 |
| H | -0.26048100 | -0.06963500 | -0.02006900 |
| H | -1.91250000 | 0.18400700  | 0.55537700  |
| C | -0.94125100 | 1.01838300  | -5.22725900 |
| H | -1.13657800 | 1.82966000  | -5.93253700 |
| H | 0.13283400  | 0.80827800  | -5.23414700 |
| H | -1.46539800 | 0.12094900  | -5.57364800 |
| H | 2.38538000  | 0.62624200  | -0.42620500 |
| C | 1.75781900  | 2.78625100  | -3.62536700 |
| S | 1.97699400  | 3.86481800  | -2.21266100 |

|   |              |             |              |
|---|--------------|-------------|--------------|
| N | 1. 98195800  | 1. 53714500 | -3. 69890100 |
| H | 0. 94070600  | 1. 41232400 | -1. 12752900 |
| C | 1. 27973100  | 3. 50406300 | -4. 84272100 |
| C | 0. 36571400  | 4. 55834400 | -4. 76863900 |
| C | 1. 73086300  | 3. 06503200 | -6. 09073200 |
| C | -0. 10203200 | 5. 15641900 | -5. 93626500 |
| H | -0. 00429900 | 4. 89342000 | -3. 80374100 |
| C | 1. 27028800  | 3. 67200500 | -7. 25266200 |
| H | 2. 43878400  | 2. 24482400 | -6. 13203400 |
| C | 0. 34933500  | 4. 71620300 | -7. 17827400 |
| H | -0. 82167800 | 5. 96679000 | -5. 87334300 |
| H | 1. 63361500  | 3. 32733000 | -8. 21576000 |
| H | -0. 01403500 | 5. 18747200 | -8. 08634600 |

**PR**

|   |              |             |              |
|---|--------------|-------------|--------------|
| C | 2. 68655800  | 2. 89664000 | -0. 98634300 |
| C | 2. 27183700  | 1. 46022400 | -1. 30723800 |
| H | 3. 77850400  | 2. 96717700 | -1. 01145400 |
| C | 2. 20259300  | 3. 37503400 | 0. 36408500  |
| C | 3. 12744200  | 3. 78975100 | 1. 32214800  |
| C | 0. 84062100  | 3. 38670800 | 0. 67968400  |
| C | 2. 70131000  | 4. 20196100 | 2. 58270700  |
| H | 4. 18695000  | 3. 78653800 | 1. 08062300  |
| C | 0. 41513000  | 3. 79734100 | 1. 93775800  |
| H | 0. 11118600  | 3. 08067900 | -0. 06600800 |
| C | 1. 34522400  | 4. 20521800 | 2. 89260200  |
| H | 3. 43035600  | 4. 52237900 | 3. 32019900  |
| H | -0. 64437200 | 3. 80183000 | 2. 17330700  |
| H | 1. 01155600  | 4. 52741000 | 3. 87380600  |
| C | 2. 88303500  | 1. 03890600 | -2. 62785900 |
| O | 3. 62521300  | 0. 08934100 | -2. 72633300 |
| H | 2. 64173700  | 0. 79096400 | -0. 52832200 |
| C | 2. 11852900  | 2. 99286300 | -3. 71779200 |
| S | 2. 05882300  | 4. 03965600 | -2. 28204300 |
| N | 2. 52469000  | 1. 77907300 | -3. 76358200 |
| H | 1. 17990700  | 1. 38208300 | -1. 35913500 |
| C | 1. 65720600  | 3. 63735600 | -4. 97954200 |
| C | 0. 98964400  | 4. 86650100 | -4. 99470400 |
| C | 1. 90359400  | 2. 97489500 | -6. 18865000 |
| C | 0. 57226600  | 5. 42100200 | -6. 19954500 |
| H | 0. 77591900  | 5. 39410300 | -4. 07041000 |
| C | 1. 48706100  | 3. 53376100 | -7. 38921100 |
| H | 2. 42643400  | 2. 02546600 | -6. 16414600 |
| C | 0. 82075000  | 4. 75779200 | -7. 39806600 |

|   |            |            |             |
|---|------------|------------|-------------|
| H | 0.04979200 | 6.37189000 | -6.19980500 |
| H | 1.68557400 | 3.01461300 | -8.32125200 |
| H | 0.49506900 | 5.19378900 | -8.33734700 |

**PS**

|   |             |             |             |
|---|-------------|-------------|-------------|
| C | 3.46449700  | 1.92937000  | -2.07466900 |
| C | 2.99189800  | 0.74493900  | -2.91853300 |
| H | 4.51176200  | 1.77365500  | -1.79709300 |
| C | 3.34719500  | 3.25793500  | -2.78703800 |
| C | 4.49447500  | 4.01313700  | -3.02866900 |
| C | 2.11087900  | 3.72947100  | -3.23882000 |
| C | 4.41229800  | 5.22219500  | -3.71546300 |
| H | 5.45693200  | 3.65107400  | -2.67731400 |
| C | 2.02841500  | 4.93675600  | -3.92315700 |
| H | 1.20978700  | 3.15373500  | -3.04335600 |
| C | 3.17950000  | 5.68528000  | -4.16399600 |
| H | 5.31256800  | 5.79988000  | -3.89919000 |
| H | 1.06421000  | 5.29538900  | -4.26899000 |
| H | 3.11288100  | 6.62810800  | -4.69754900 |
| C | 3.24245800  | -0.54641800 | -2.16666100 |
| O | 3.94148200  | -1.42912900 | -2.60709900 |
| H | 3.55724300  | 0.71378900  | -3.85188700 |
| C | 2.21236400  | 0.27899000  | -0.20645700 |
| S | 2.51475400  | 2.00514300  | -0.50347100 |
| N | 2.59706900  | -0.70471600 | -0.93085200 |
| H | 1.92510500  | 0.84498700  | -3.14834800 |
| C | 1.45646500  | -0.00899600 | 1.04375700  |
| C | 0.71853500  | 0.97153900  | 1.71525700  |
| C | 1.49387500  | -1.31208900 | 1.55455100  |
| C | 0.02780600  | 0.65185300  | 2.87892600  |
| H | 0.66106000  | 1.98410100  | 1.32806200  |
| C | 0.80686700  | -1.62468700 | 2.72005100  |
| H | 2.07121600  | -2.06224400 | 1.02583600  |
| C | 0.07239700  | -0.64439700 | 3.38485600  |
| H | -0.54702200 | 1.41800200  | 3.38855000  |
| H | 0.84704100  | -2.63549900 | 3.11269200  |
| H | -0.46477700 | -0.89041100 | 4.29538500  |

**E-M4\_Li<sup>+</sup>**

|   |            |            |             |
|---|------------|------------|-------------|
| C | 4.04477100 | 0.80011400 | -1.67569000 |
| C | 3.16341400 | 0.47159500 | -0.64743300 |
| C | 2.39160300 | 1.44153200 | -0.02369000 |
| C | 2.49956100 | 2.73596500 | -0.51054200 |
| C | 3.37169700 | 3.10167400 | -1.53423400 |

|   |              |              |              |
|---|--------------|--------------|--------------|
| C | 4. 16062800  | 2. 11949500  | -2. 11701400 |
| C | 4. 78845500  | -0. 40663500 | -2. 17432900 |
| C | 4. 22497500  | -1. 60844900 | -1. 37408100 |
| C | 3. 17041700  | -1. 01040000 | -0. 35529000 |
| H | 1. 70961600  | 1. 22218600  | 0. 78790000  |
| H | 3. 40849600  | 4. 13388800  | -1. 86235800 |
| H | 4. 84950700  | 2. 37842900  | -2. 91458900 |
| H | 4. 65411000  | -0. 56756500 | -3. 24957100 |
| H | 5. 01250400  | -2. 09739200 | -0. 80078100 |
| H | 5. 86520600  | -0. 30381400 | -2. 00833100 |
| H | 3. 43866700  | -1. 23183800 | 0. 67832100  |
| N | 1. 84550100  | -1. 62696300 | -0. 57611700 |
| O | 3. 71633900  | -2. 63014200 | -2. 20249500 |
| C | 0. 78019200  | -1. 71109100 | 0. 23742000  |
| C | 1. 47561300  | -2. 21652100 | -1. 75215000 |
| N | -0. 15038500 | -2. 37803300 | -0. 43424100 |
| N | 0. 27200500  | -2. 70835800 | -1. 68080200 |
| C | 2. 49417500  | -2. 30970900 | -2. 83484500 |
| H | 2. 54091500  | -1. 35871100 | -3. 38338800 |
| H | 2. 24864500  | -3. 11654700 | -3. 52485000 |
| C | -1. 43209700 | -2. 80588800 | 0. 05971700  |
| C | -2. 57930200 | -2. 40543400 | -0. 64155600 |
| C | -1. 46998800 | -3. 59338700 | 1. 21698000  |
| C | -3. 80532300 | -2. 79401200 | -0. 10994000 |
| C | -2. 73004600 | -3. 95042700 | 1. 69708800  |
| C | -3. 90361000 | -3. 55985300 | 1. 05519200  |
| H | -4. 71365400 | -2. 49314900 | -0. 62637900 |
| H | -2. 79064300 | -4. 56346900 | 2. 59261600  |
| C | -5. 24967900 | -3. 98551000 | 1. 57793000  |
| N | 1. 62216200  | 3. 76030900  | 0. 05338100  |
| O | 0. 66104900  | 3. 37325500  | 0. 73832300  |
| O | 1. 86544100  | 4. 91676200  | -0. 16038100 |
| H | -5. 61148300 | -4. 86203100 | 1. 02998400  |
| H | -5. 99081900 | -3. 19174800 | 1. 45386600  |
| H | -5. 20056300 | -4. 25065800 | 2. 63628600  |
| C | -0. 23080500 | -4. 08091400 | 1. 92917900  |
| H | 0. 58698100  | -4. 29374100 | 1. 23418900  |
| H | 0. 13337200  | -3. 36164300 | 2. 67127900  |
| H | -0. 45678000 | -5. 00494400 | 2. 46490300  |
| C | -2. 50723400 | -1. 59904300 | -1. 91178400 |
| H | -1. 77352000 | -0. 79214100 | -1. 83139500 |
| H | -2. 21238800 | -2. 23342100 | -2. 75301600 |
| H | -3. 48616300 | -1. 17005000 | -2. 13646300 |
| H | 0. 92615400  | 1. 28283600  | -3. 55708800 |

|    |             |             |             |
|----|-------------|-------------|-------------|
| C  | 0.07660600  | 1.30506200  | -1.88483000 |
| O  | -0.27417100 | 0.62978400  | -0.87851500 |
| O  | 0.75492600  | 0.63663500  | -2.85162600 |
| O  | -0.13156500 | 2.53209400  | -2.01794100 |
| C  | -0.54501300 | 0.86075200  | 2.51288000  |
| C  | -0.56066700 | -0.25161600 | 1.75564800  |
| H  | 0.32622400  | 1.04533400  | 3.14140100  |
| C  | -1.54439600 | 1.92749800  | 2.44686600  |
| C  | -1.36789100 | 3.06819400  | 3.24118700  |
| C  | -2.60831400 | 1.90199600  | 1.52182200  |
| C  | -2.22476000 | 4.15718500  | 3.12178900  |
| H  | -0.54185500 | 3.10141800  | 3.94594100  |
| C  | -3.45512200 | 2.99806300  | 1.39593500  |
| H  | -2.78019600 | 1.02329900  | 0.90337300  |
| C  | -3.26334000 | 4.12852300  | 2.19510300  |
| H  | -2.07330900 | 5.03350500  | 3.74281000  |
| H  | -4.27157000 | 2.96927700  | 0.68134600  |
| H  | -3.92495700 | 4.98218400  | 2.09235300  |
| C  | 0.67490100  | -1.00886000 | 1.57304800  |
| O  | 1.66704500  | -0.97878000 | 2.27422900  |
| H  | -1.37550500 | -0.47097000 | 1.07750700  |
| Li | -0.77763900 | 2.41842400  | -0.18673000 |

**TS5R\_Li<sup>+</sup>**

|   |             |             |             |
|---|-------------|-------------|-------------|
| C | -5.50133500 | 0.07963300  | 0.46583000  |
| C | -4.11882200 | -0.07293300 | 0.43088800  |
| C | -3.52502000 | -1.09892600 | -0.27250100 |
| C | -4.35262900 | -2.06572300 | -0.80910000 |
| C | -5.74253300 | -1.96907100 | -0.78601600 |
| C | -6.31868200 | -0.86097000 | -0.16851000 |
| C | -5.88065600 | 1.31152300  | 1.24597000  |
| C | -4.55016600 | 1.88877500  | 1.80586100  |
| C | -3.41837500 | 0.88746900  | 1.34928900  |
| H | -2.45569200 | -1.14220600 | -0.38998500 |
| H | -6.34901300 | -2.75259500 | -1.22621300 |
| H | -7.39832700 | -0.75753400 | -0.14991900 |
| H | -6.37298100 | 2.05653900  | 0.61086800  |
| H | -4.57211700 | 1.90999100  | 2.89566900  |
| H | -6.57501800 | 1.07972800  | 2.05758600  |
| H | -3.01445800 | 0.34684300  | 2.20584400  |
| N | -2.28610600 | 1.57494500  | 0.71650400  |
| O | -4.31493300 | 3.23111900  | 1.43552000  |
| C | -0.97257000 | 1.25791400  | 0.64056400  |
| C | -2.44856000 | 2.78655700  | 0.11079000  |

|   |             |             |             |
|---|-------------|-------------|-------------|
| N | -0.40333700 | 2.29773300  | 0.02039700  |
| N | -1.30892300 | 3.25377800  | -0.31036400 |
| C | -3.80971000 | 3.40231000  | 0.12738300  |
| H | -4.45461600 | 2.93565400  | -0.63095000 |
| H | -3.74096400 | 4.47112900  | -0.07547000 |
| C | 0.98513900  | 2.51429400  | -0.31337800 |
| C | 1.38885500  | 2.25634400  | -1.62314300 |
| C | 1.83464900  | 2.99907200  | 0.68725900  |
| C | 2.74321900  | 2.43433300  | -1.90570300 |
| C | 3.17752300  | 3.14747700  | 0.35110200  |
| C | 3.64990300  | 2.85114500  | -0.93232900 |
| H | 3.09406600  | 2.23555600  | -2.91362400 |
| H | 3.87021700  | 3.51401400  | 1.10470400  |
| C | 5.11559600  | 2.96703200  | -1.24982400 |
| C | 1.48588400  | -1.33319000 | 1.88901000  |
| C | 1.00134100  | -0.16380300 | 1.30925400  |
| H | 0.75936800  | -1.98785200 | 2.35911300  |
| C | 2.87250500  | -1.53542700 | 2.29460800  |
| C | 3.20642400  | -2.71756900 | 2.97266200  |
| C | 3.87226300  | -0.57479200 | 2.06385400  |
| C | 4.50508400  | -2.94132600 | 3.40627600  |
| H | 2.43681600  | -3.46611900 | 3.14147500  |
| C | 5.16999200  | -0.80008500 | 2.50170700  |
| H | 3.63915900  | 0.35066900  | 1.54385500  |
| C | 5.48862000  | -1.98147800 | 3.17143500  |
| H | 4.75299800  | -3.86021400 | 3.92648000  |
| H | 5.93614300  | -0.05211900 | 2.32574100  |
| H | 6.50504700  | -2.15333700 | 3.51091000  |
| C | -0.38025300 | -0.04482100 | 1.12731500  |
| O | -1.22105000 | -0.95941800 | 1.36264000  |
| N | -3.69565600 | -3.27358300 | -1.29910500 |
| O | -2.53677900 | -3.48663500 | -0.90635000 |
| O | -4.30036900 | -4.02014400 | -2.02377100 |
| H | 5.28110700  | 3.08741200  | -2.32272400 |
| H | 5.64532300  | 2.06207300  | -0.93165500 |
| H | 5.56972800  | 3.81560700  | -0.73190300 |
| C | 1.32267700  | 3.31387000  | 2.06698000  |
| H | 0.46315900  | 3.99102500  | 2.02746000  |
| H | 1.00978400  | 2.40330500  | 2.59220200  |
| H | 2.10227800  | 3.79030200  | 2.66338000  |
| C | 0.41213700  | 1.81322300  | -2.67549100 |
| H | 0.06569000  | 0.78896300  | -2.48885500 |
| H | -0.45726600 | 2.47750500  | -2.70594400 |
| H | 0.88721300  | 1.83203000  | -3.65795600 |



|    |             |             |             |
|----|-------------|-------------|-------------|
| H  | 1.67456200  | 0.60508700  | 0.96271800  |
| C  | 0.99367900  | -1.94029800 | -1.37611100 |
| S  | 1.06178500  | -3.11861200 | -0.05429500 |
| N  | -0.08984600 | -1.50995200 | -1.92144900 |
| H  | -0.89824700 | -2.04481200 | -1.60135500 |
| C  | 2.28255400  | -1.39449500 | -1.90502400 |
| C  | 3.46083000  | -1.41964500 | -1.15610300 |
| C  | 2.31396900  | -0.86848500 | -3.20371400 |
| C  | 4.63932200  | -0.88839200 | -1.67338700 |
| H  | 3.46047400  | -1.87877900 | -0.17482200 |
| C  | 3.49784300  | -0.36667500 | -3.73104700 |
| H  | 1.40520500  | -0.88447800 | -3.79564600 |
| C  | 4.66248600  | -0.36274000 | -2.96211900 |
| H  | 5.54486200  | -0.91053100 | -1.07426700 |
| H  | 3.51598500  | 0.01628400  | -4.74714300 |
| H  | 5.58700000  | 0.03086500  | -3.37418700 |
| Li | -1.21647900 | -2.74442400 | 0.55735700  |

**TS5S\_Li<sup>+</sup>**

|   |            |             |             |
|---|------------|-------------|-------------|
| C | 4.93201800 | -1.17039200 | 0.06056300  |
| C | 3.72062300 | -0.62782300 | 0.49160100  |
| C | 3.67458200 | 0.34665300  | 1.48005000  |
| C | 4.88890600 | 0.75666500  | 2.01219500  |
| C | 6.11550200 | 0.24267800  | 1.60029100  |
| C | 6.13547200 | -0.73563400 | 0.61377300  |
| C | 4.72379800 | -2.21456400 | -1.00090400 |
| C | 3.21093600 | -2.18964700 | -1.32279700 |
| C | 2.55080000 | -1.23622300 | -0.24996200 |
| H | 2.74177500 | 0.77302900  | 1.83044900  |
| H | 7.02851500 | 0.60938800  | 2.05350900  |
| H | 7.08037200 | -1.15132100 | 0.27958100  |
| H | 5.30910200 | -2.02284600 | -1.90610300 |
| H | 2.77193800 | -3.18325700 | -1.22330100 |
| H | 5.02008000 | -3.20331000 | -0.63884200 |
| H | 1.87739100 | -1.80562200 | 0.39702500  |
| N | 1.74095200 | -0.20448700 | -0.91881000 |
| O | 2.93830800 | -1.80783300 | -2.65869900 |
| C | 0.62796000 | 0.43706200  | -0.52217800 |
| C | 2.05047200 | 0.27335200  | -2.16286500 |
| N | 0.33214700 | 1.29131400  | -1.50087300 |
| N | 1.20580600 | 1.19047900  | -2.53771100 |
| C | 3.13247300 | -0.42918500 | -2.91518800 |
| H | 4.12619700 | -0.08151400 | -2.60159500 |
| H | 3.01747300 | -0.25728500 | -3.98580500 |

|   |             |             |             |
|---|-------------|-------------|-------------|
| C | -0.73085100 | 2.26502900  | -1.54096200 |
| C | -0.68980400 | 3.34263100  | -0.65224100 |
| C | -1.74776300 | 2.07245800  | -2.48140000 |
| C | -1.74287400 | 4.25402500  | -0.72206000 |
| C | -2.77307200 | 3.01299600  | -2.50443200 |
| C | -2.78632300 | 4.10806800  | -1.63681100 |
| H | -1.74114600 | 5.10434400  | -0.04534300 |
| H | -3.58028800 | 2.88798800  | -3.22166600 |
| C | -3.89282000 | 5.12414500  | -1.71289100 |
| C | -2.29158600 | -0.12835700 | 1.78462600  |
| C | -1.51233800 | 0.14024200  | 0.64430700  |
| H | -1.84900800 | 0.13163200  | 2.74322000  |
| C | -3.75554700 | -0.14041300 | 1.77089300  |
| C | -4.43673500 | -0.11933900 | 2.99708000  |
| C | -4.49639400 | -0.15105400 | 0.57921400  |
| C | -5.82329900 | -0.10961300 | 3.03598500  |
| H | -3.86505200 | -0.11652700 | 3.92173200  |
| C | -5.88473100 | -0.14145800 | 0.62081200  |
| H | -3.99269200 | -0.16813000 | -0.38175800 |
| C | -6.54954200 | -0.12230300 | 1.84564900  |
| H | -6.33956900 | -0.09292500 | 3.98980100  |
| H | -6.45173400 | -0.14678400 | -0.30430500 |
| H | -7.63443900 | -0.11571400 | 1.87285100  |
| C | -0.12906100 | 0.17791500  | 0.74038200  |
| O | 0.58168900  | -0.06532600 | 1.76421900  |
| N | 4.87128500  | 1.78281200  | 3.06652600  |
| O | 3.78354600  | 2.17800700  | 3.44992500  |
| O | 5.94070300  | 2.17402800  | 3.49264600  |
| H | -3.96759700 | 5.70130100  | -0.78888500 |
| H | -4.85714000 | 4.64511400  | -1.89970900 |
| H | -3.71016000 | 5.82681600  | -2.53247700 |
| C | -1.74022200 | 0.89846800  | -3.42153500 |
| H | -1.01051100 | 1.04271600  | -4.22424900 |
| H | -1.47753900 | -0.03194000 | -2.90775000 |
| H | -2.72470400 | 0.76851800  | -3.87520800 |
| C | 0.42653400  | 3.51860700  | 0.34280200  |
| H | 0.32585600  | 2.83073700  | 1.19077500  |
| H | 1.40640900  | 3.35183700  | -0.11571900 |
| H | 0.41521500  | 4.53296900  | 0.74437000  |
| H | -1.96883700 | 0.24056700  | -0.33291400 |
| C | -0.73799300 | -3.00851400 | 1.11627100  |
| S | -1.71957400 | -2.46554800 | 2.50188400  |
| N | 0.46030300  | -3.46127200 | 1.21205800  |
| H | 0.74583900  | -3.55928000 | 2.19014500  |

|    |             |             |             |
|----|-------------|-------------|-------------|
| C  | -1.33683100 | -2.89073900 | -0.24779100 |
| C  | -2.71879000 | -2.80728600 | -0.43347800 |
| C  | -0.49586800 | -2.87503000 | -1.36869100 |
| C  | -3.25021500 | -2.71019300 | -1.71781100 |
| H  | -3.37872200 | -2.82279800 | 0.42847500  |
| C  | -1.02554100 | -2.76414600 | -2.64819700 |
| H  | 0.57502100  | -2.96629300 | -1.22638100 |
| C  | -2.40793700 | -2.68276100 | -2.82583000 |
| H  | -4.32668200 | -2.65832400 | -1.84895400 |
| H  | -0.36007400 | -2.74774900 | -3.50596500 |
| H  | -2.82400200 | -2.60130800 | -3.82523400 |
| Li | 0.25312800  | -1.29702300 | 3.05804100  |
